# Supplementary material
Source: PubMed Central journal article supplement (PMC5376967)

Figure 3 (A)

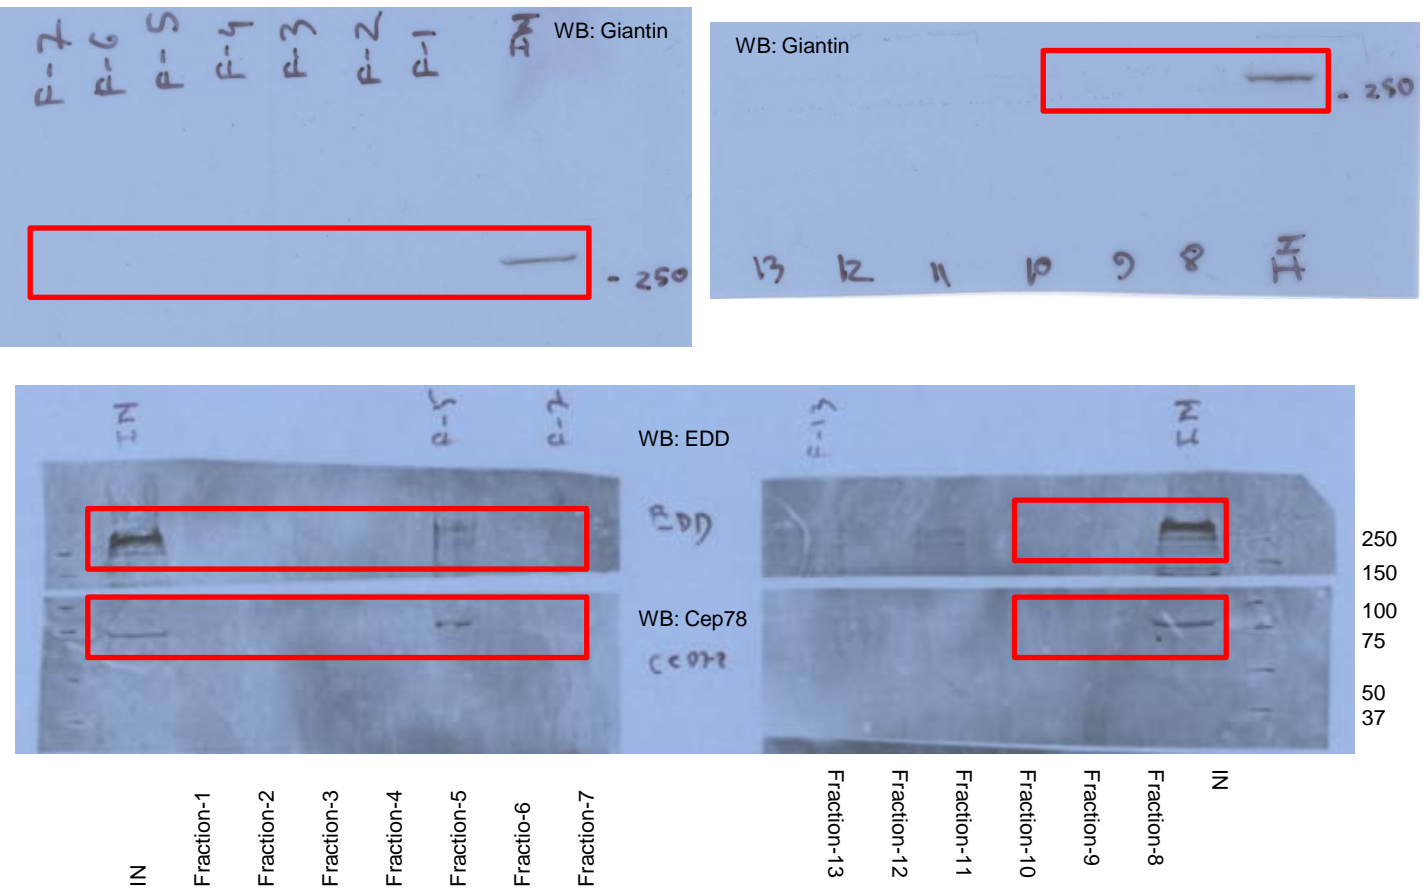

Figure 3 (A)

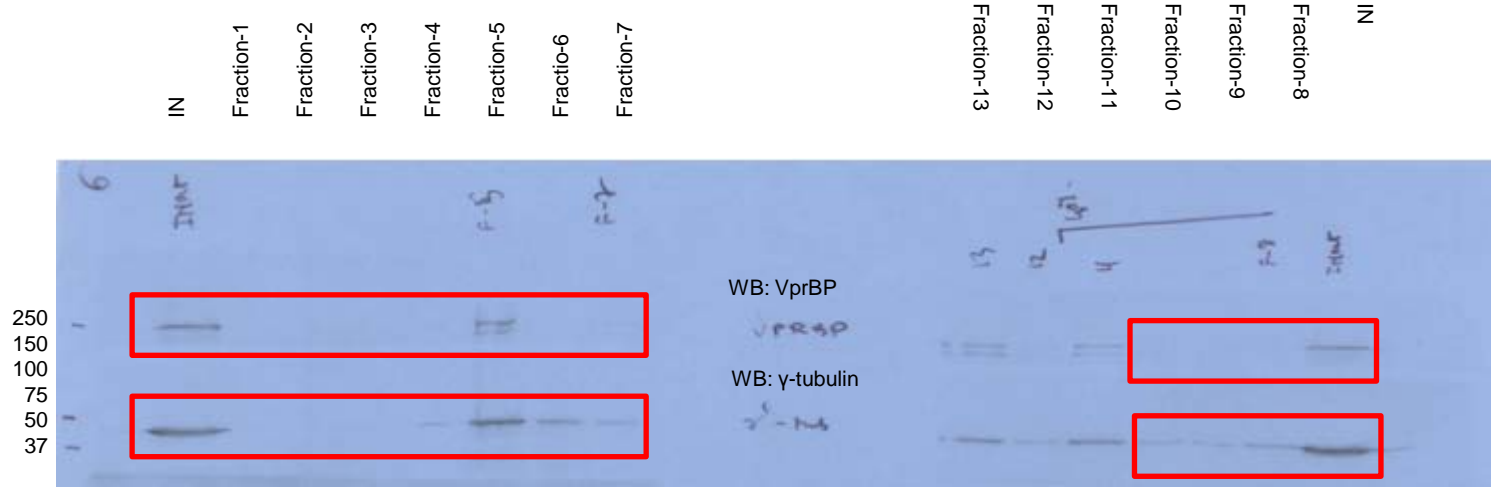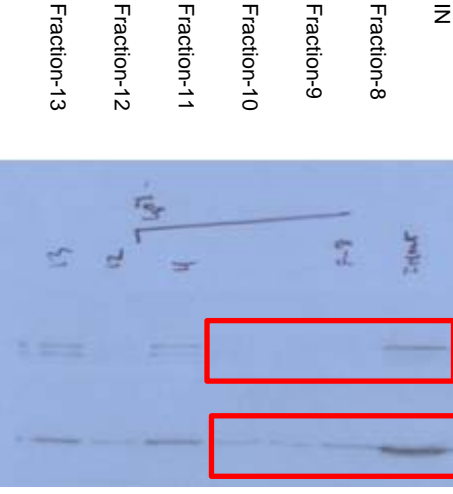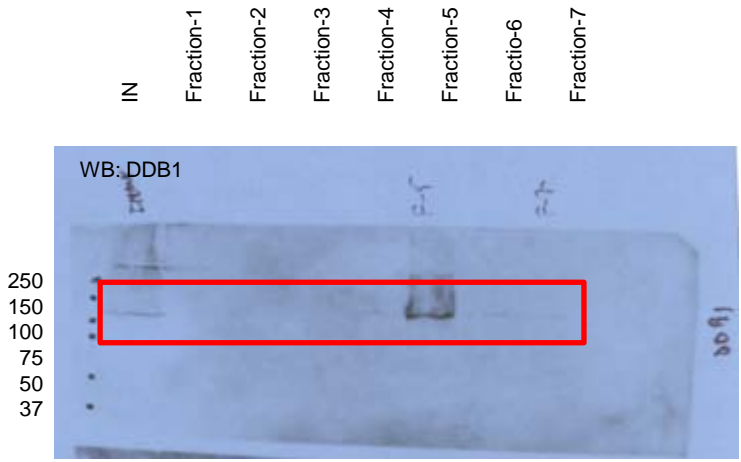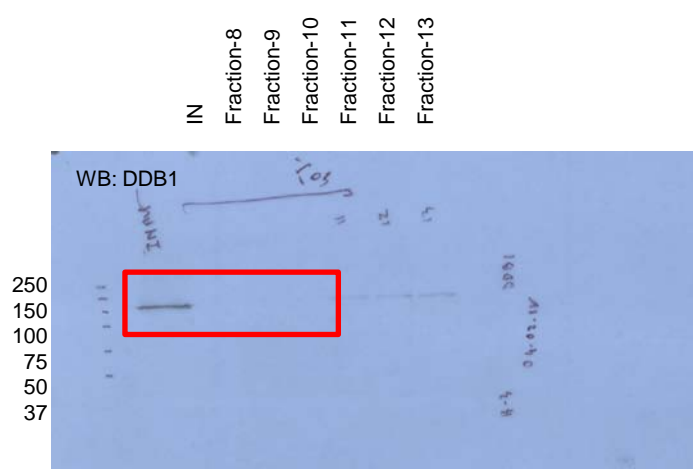

Figure 3 (A)

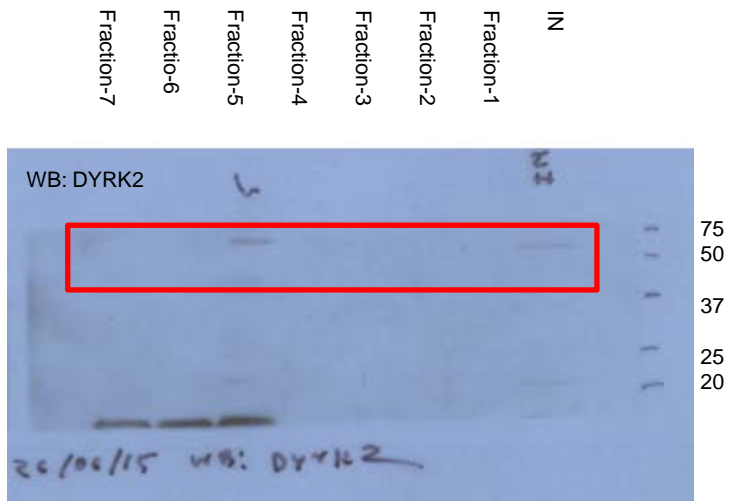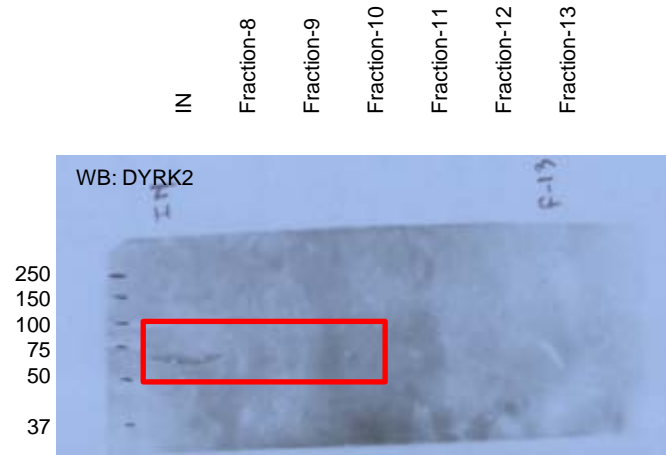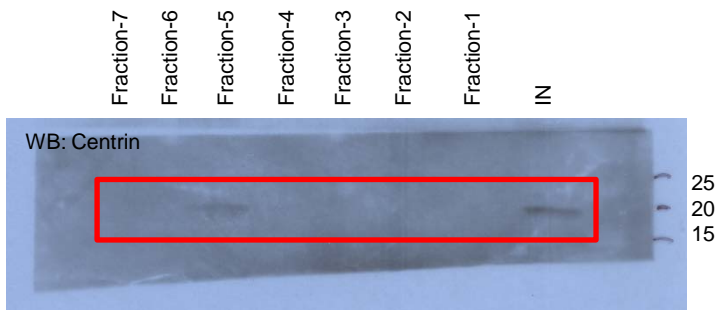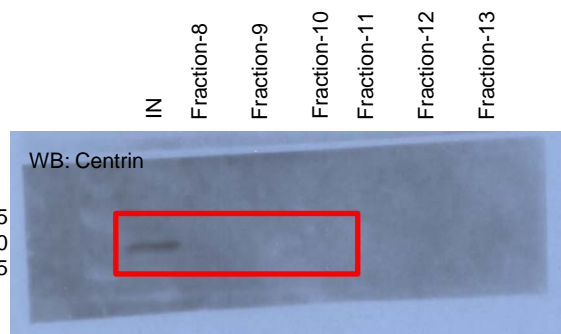

Figure 3(B1) - EDD

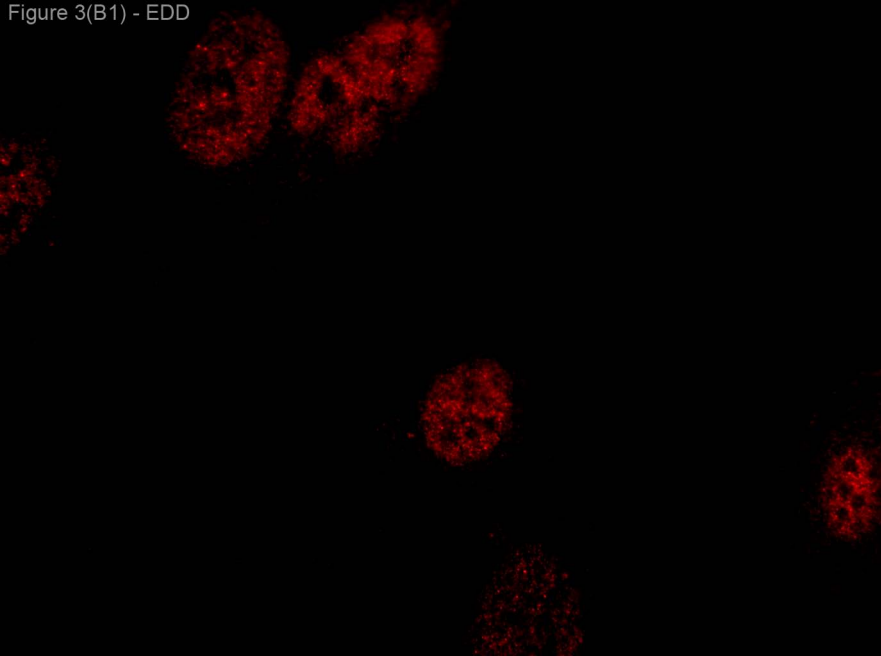

Figure 3(B1) - Centrin

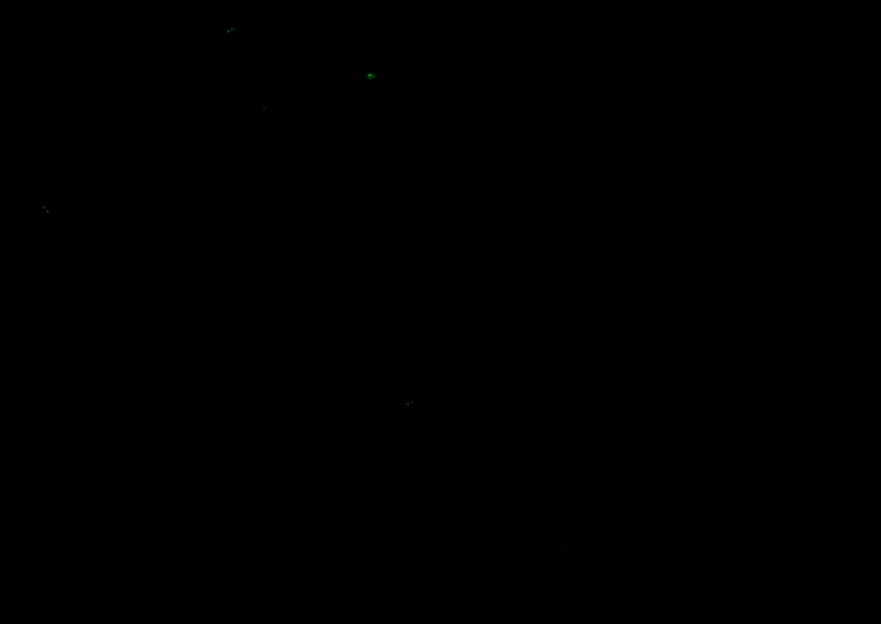

Figure 3(B1) - DAPI

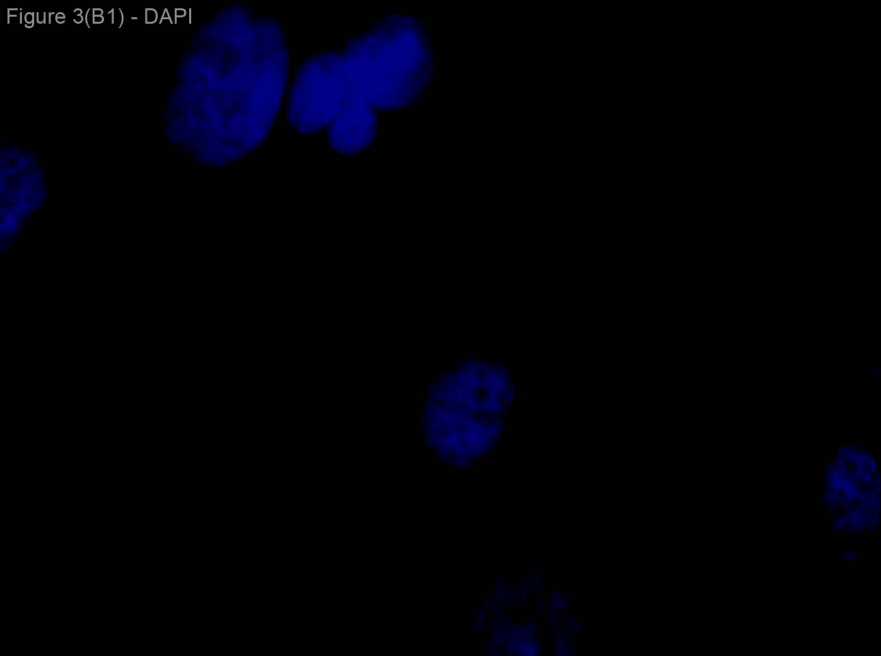

Figure 3(B1) - Merge

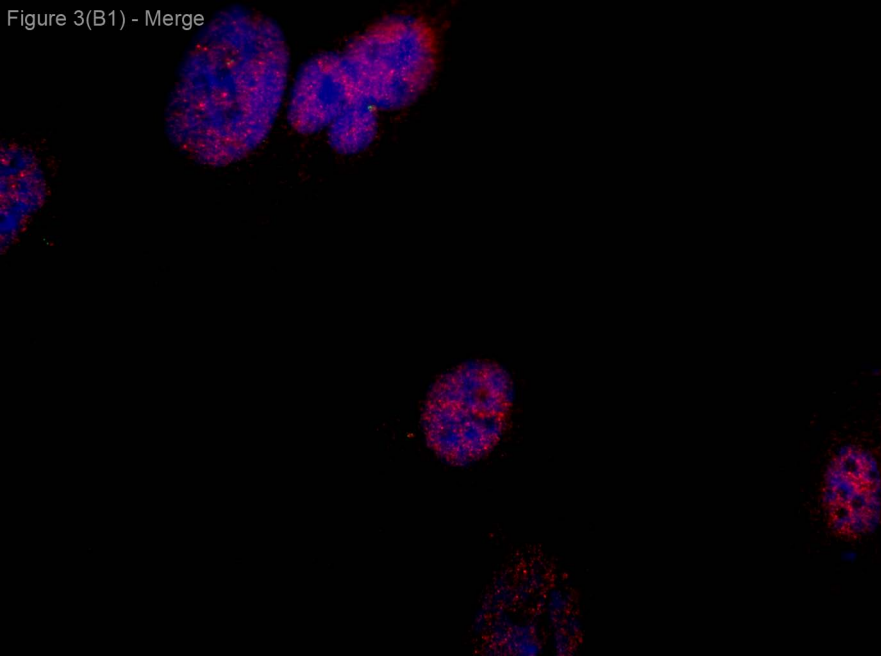

Figure 3(B2) - VprBP

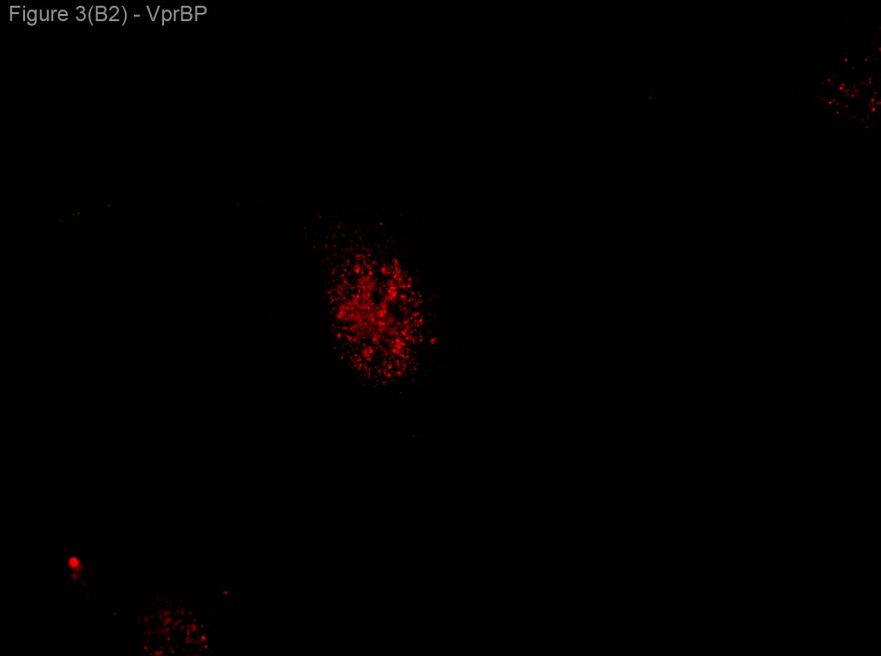



Figure 3(B2) - Centrin

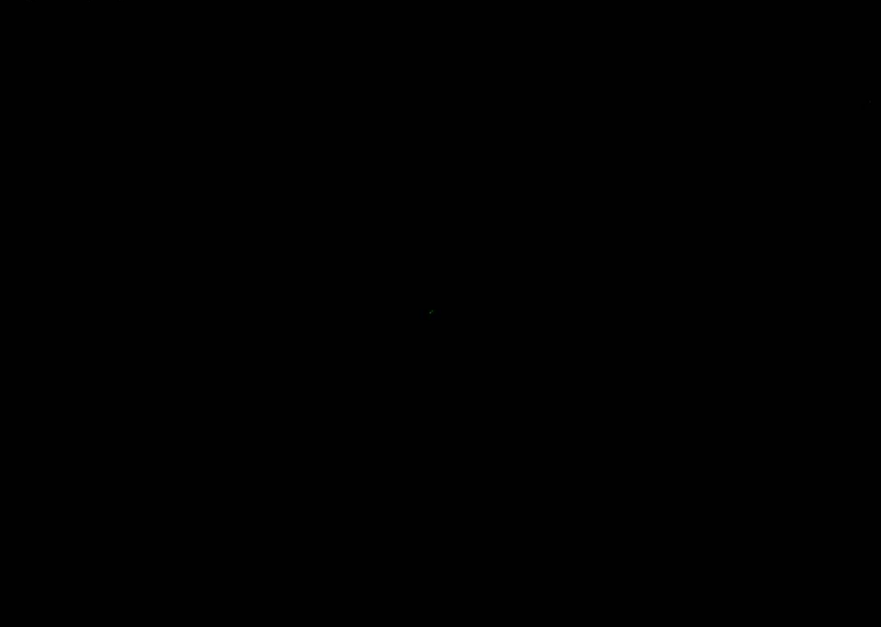

Figure 3(B2) - DAPI

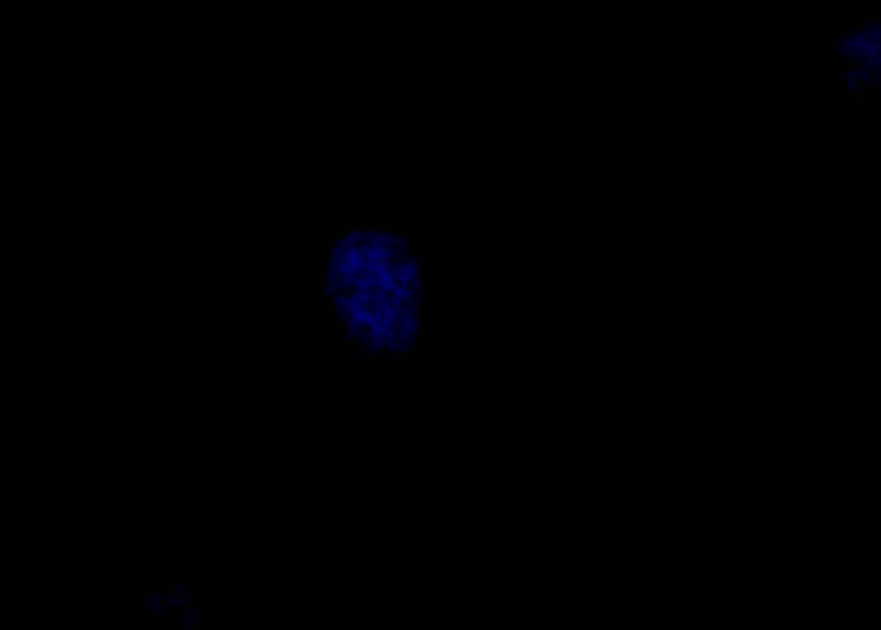

Figure 3(B2) - Merge

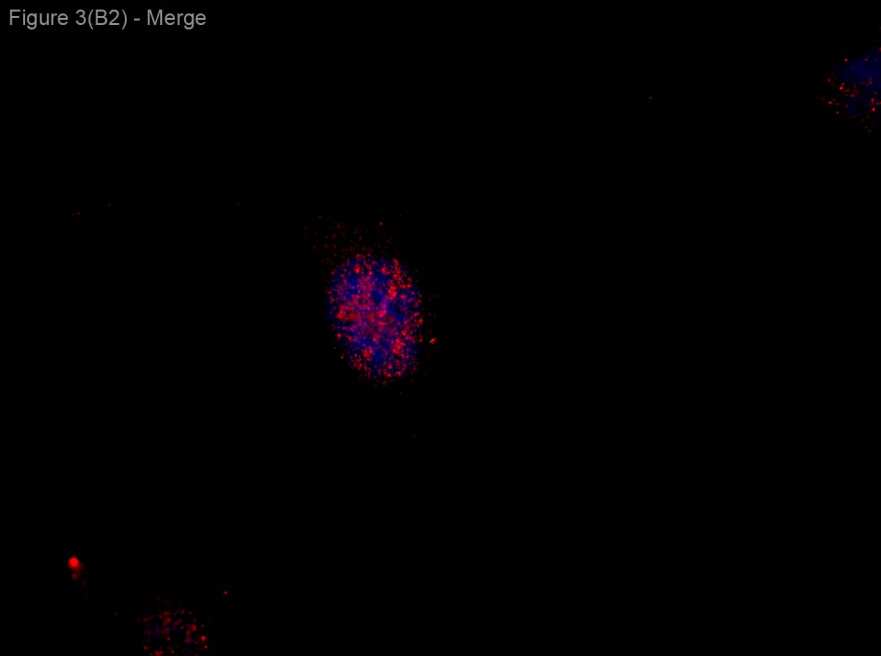

Figure 3(B3) - DYRK2

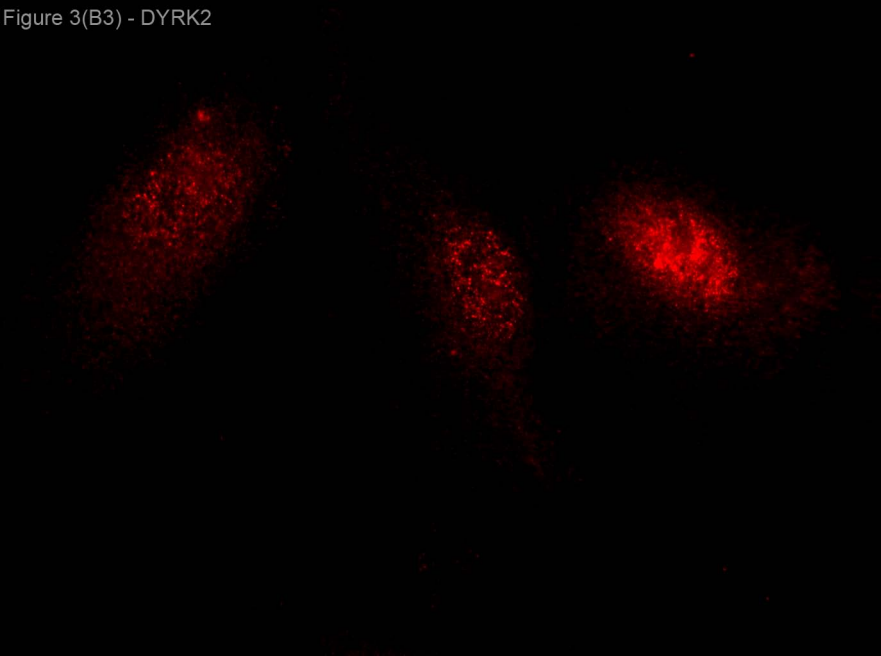

Figure 3(B3) - Centrin

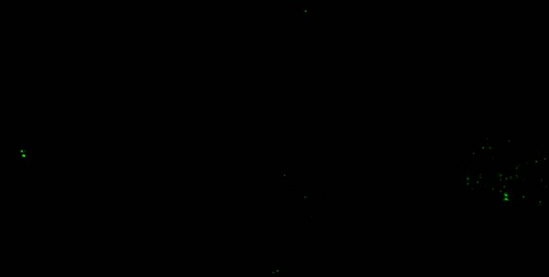

Figure 3(B3) - DAPI

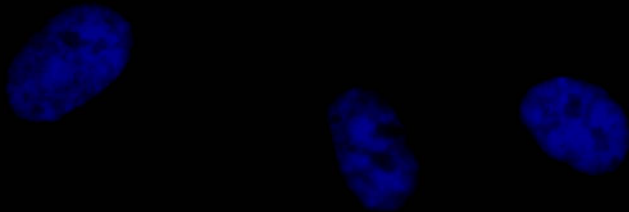

Figure 3(B3) - Merge

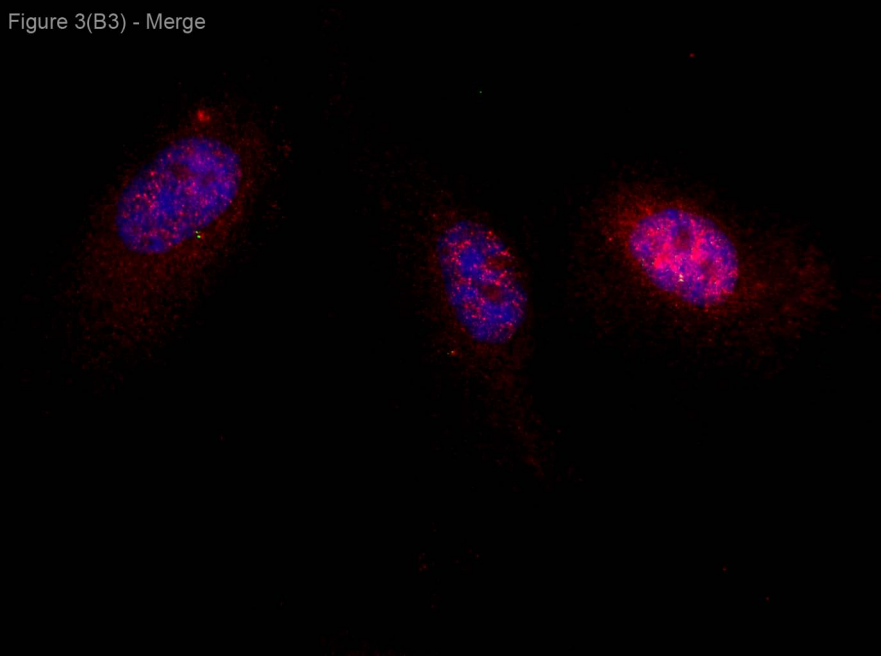

Supplement: EMBR-18-632-s006.pdf [file EMBR-18-632-s006.pdf]
