# Supplementary material
Source: PubMed Central journal article supplement (PMC5376967)

Figure 4 (A)

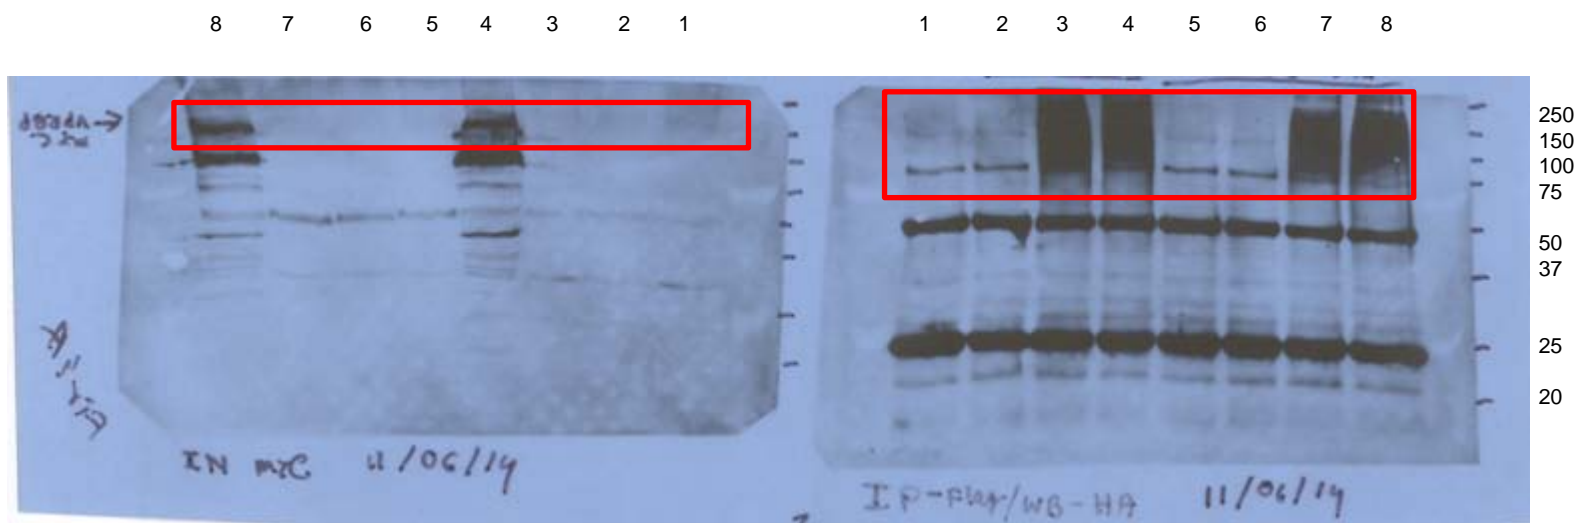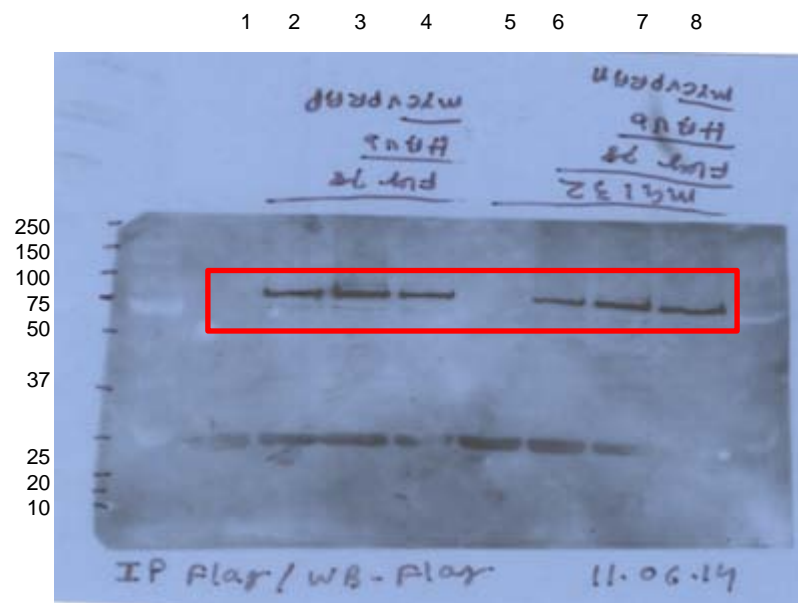

Figure 4 (A)

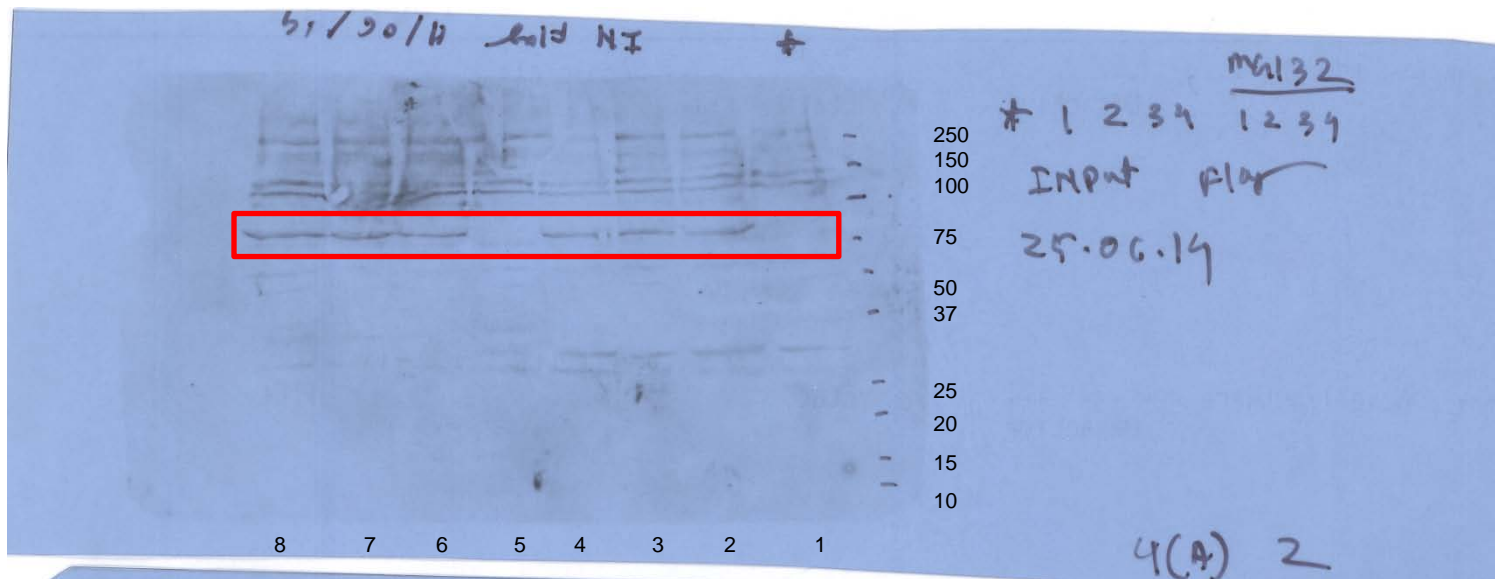

|            | 1 | 2 | 3 | 4 | 5 | 6 | 7 | 8 |
|------------|---|---|---|---|---|---|---|---|
| MG132      | - | - | - | - | + | + | + | + |
| HA         | + | + | - | - | + | + | - | - |
| HA-Ub      | - | - | + | + | - | - | + | + |
| Myc        | + | + | + | - | + | + | + | - |
| Myc-VprBP  | - | - | - | + | - | - | - | + |
| Flag       | + | - | - | - | + | - | - | - |
| Flag-Cep78 | - | + | + | + | - | + | + | + |

Figure 4 (B)

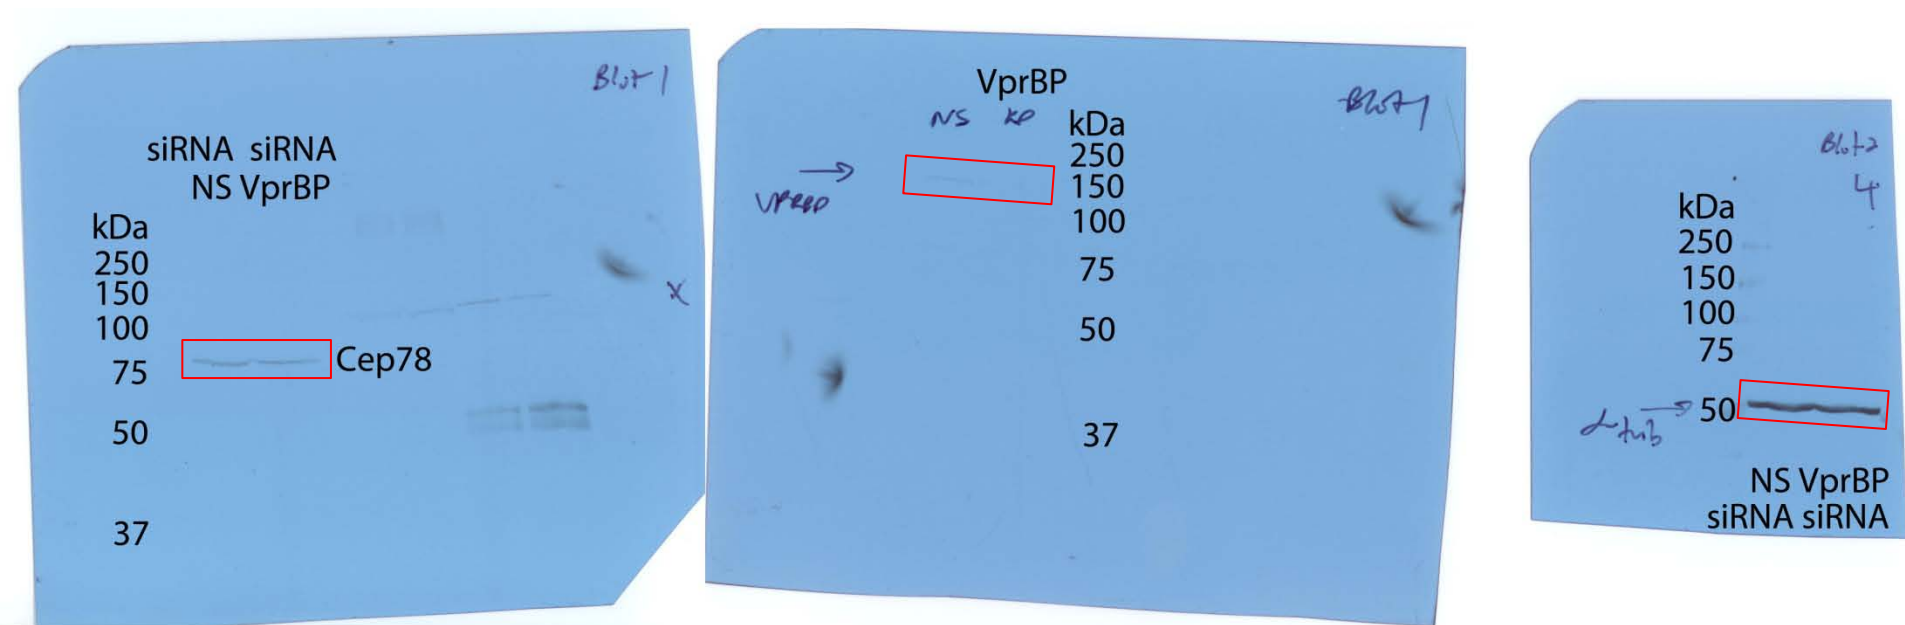

Figure 4 (B)

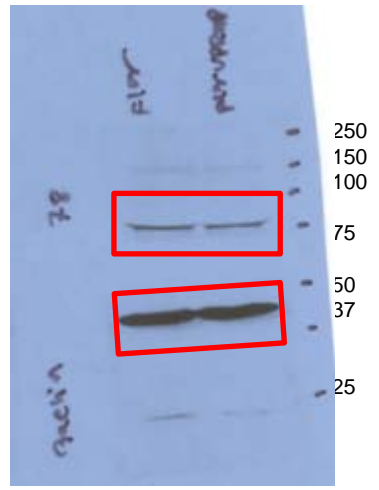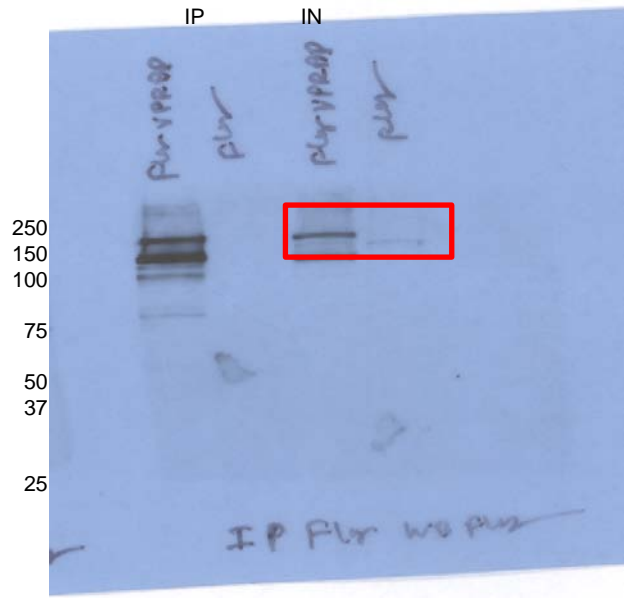

Figure 4 (C)

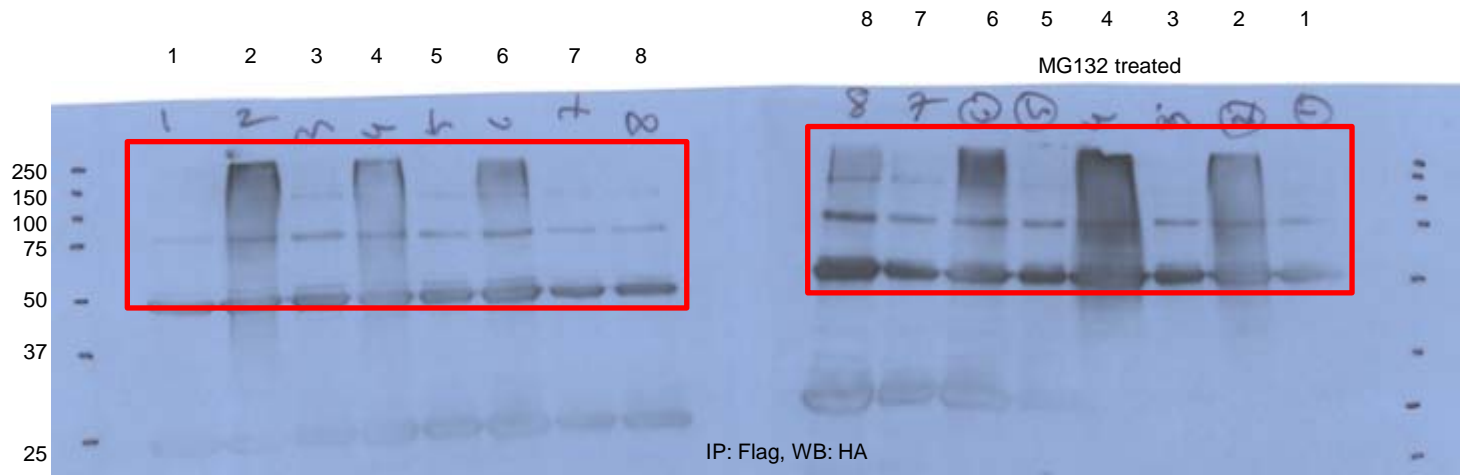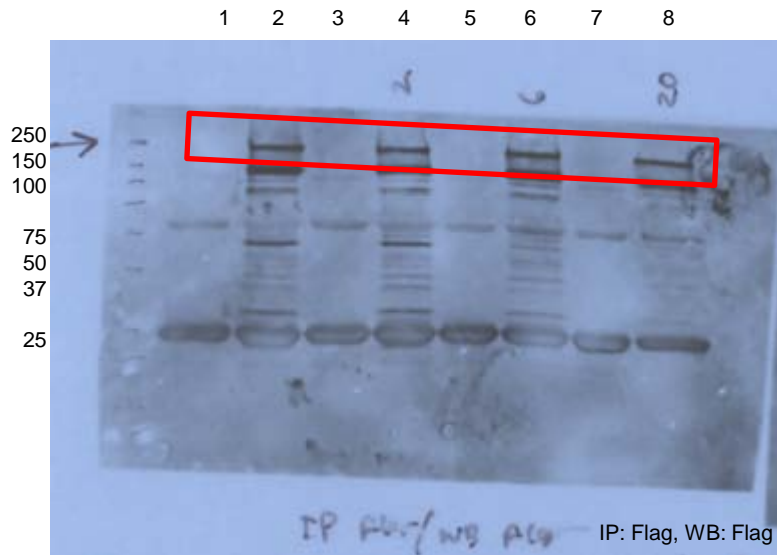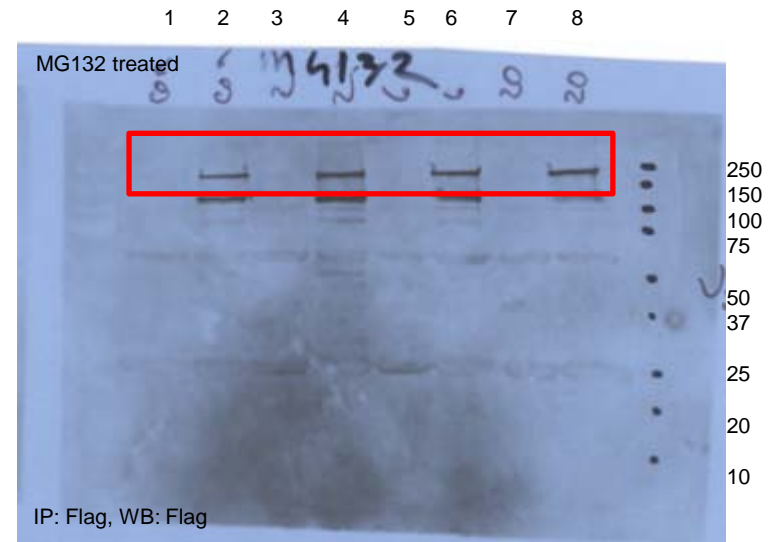

Figure 4 (C)

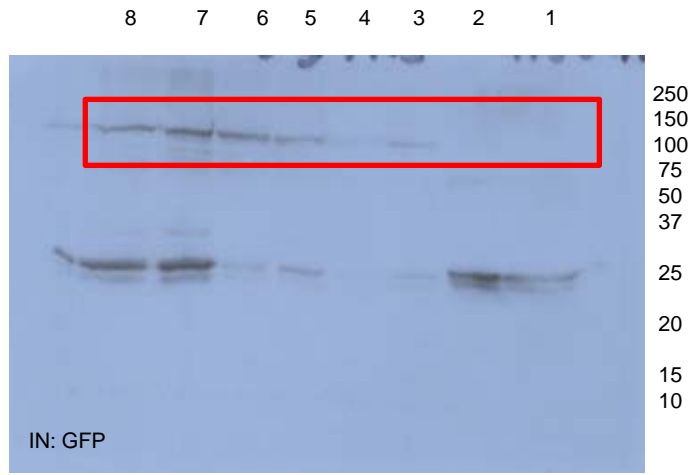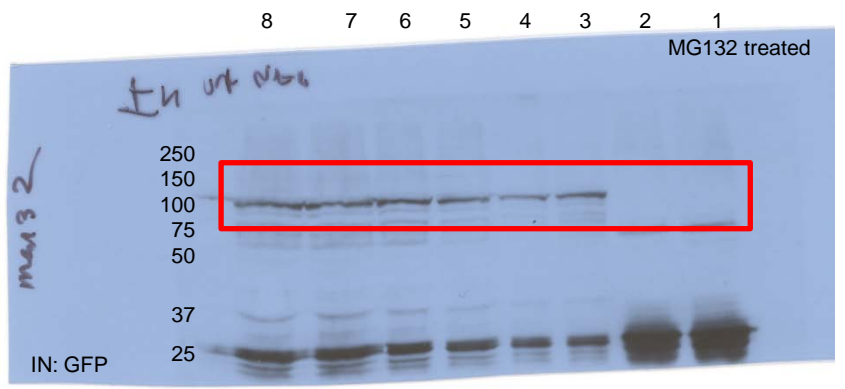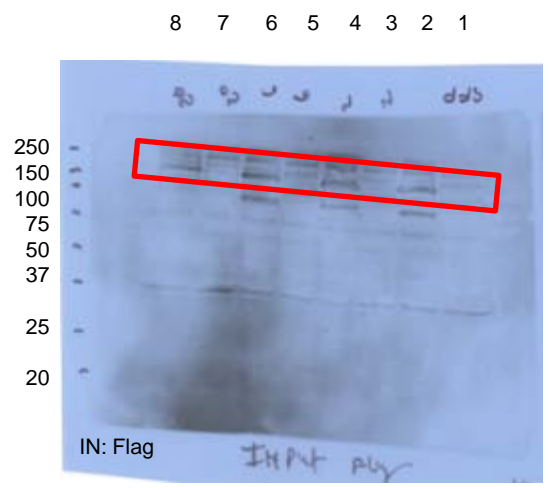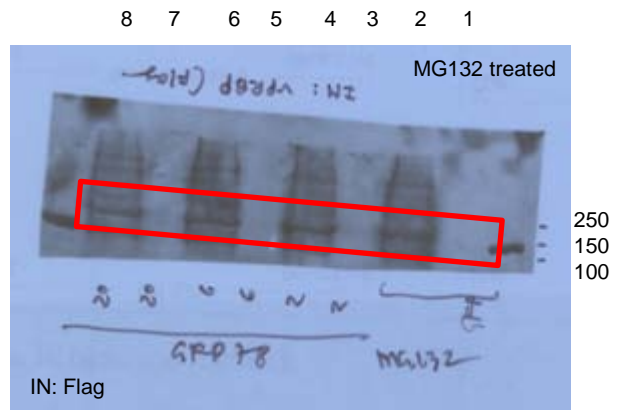

|            | 8  | 7  | 6 | 5 | 4 | 3 | 2  | 1  |
|------------|----|----|---|---|---|---|----|----|
| HA-Ub      | +  | +  | + | + | + | + | +  | +  |
| Flag       | -  | +  | - | + | - | + | -  | +  |
| Flag-VprBP | +  | -  | + | - | + | - | +  | -  |
| GFP        | 0  | 0  | 0 | 0 | 0 | 0 | 20 | 20 |
| GFP-Cep78  | 20 | 20 | 6 | 6 | 2 | 2 | 0  | 0  |

Figure 4 (D)

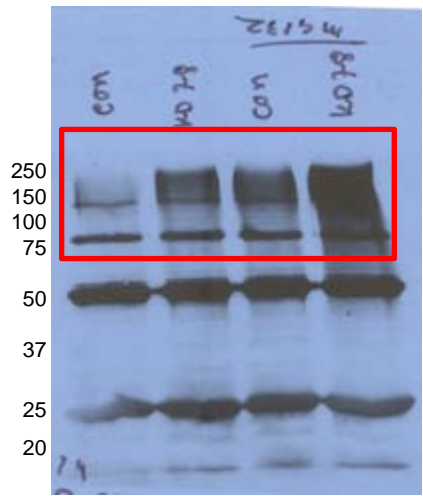

IP: Flag, WB: HA

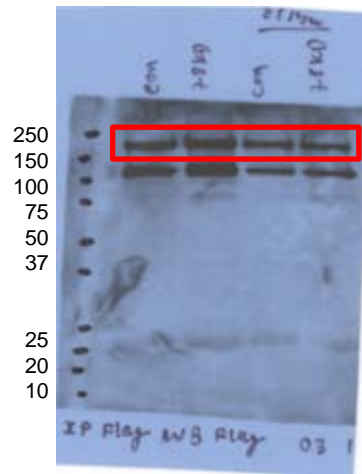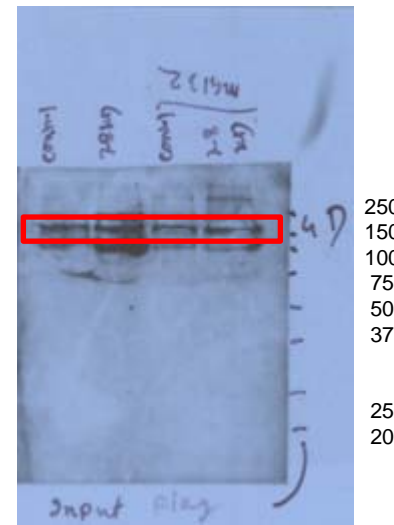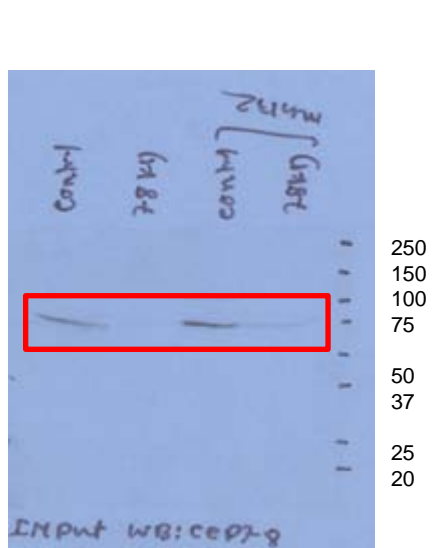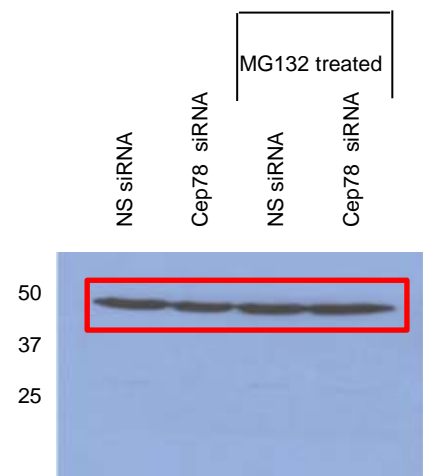

IN:  $\beta$ -actin

Figure 4 (E)

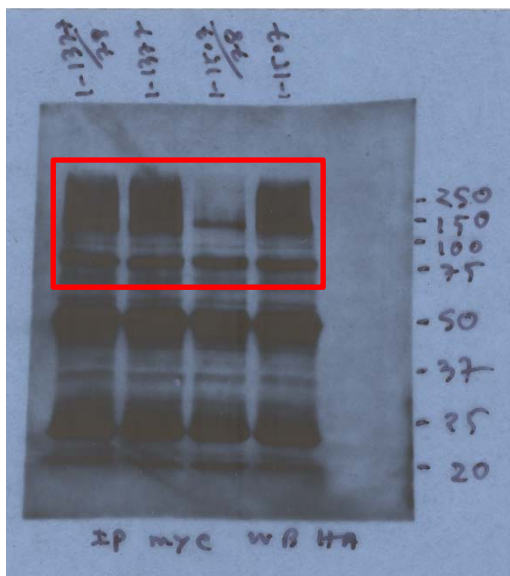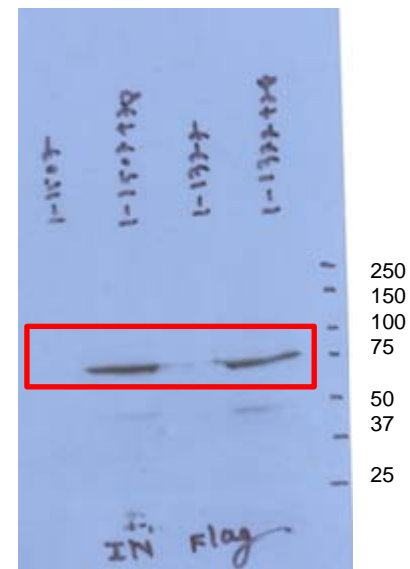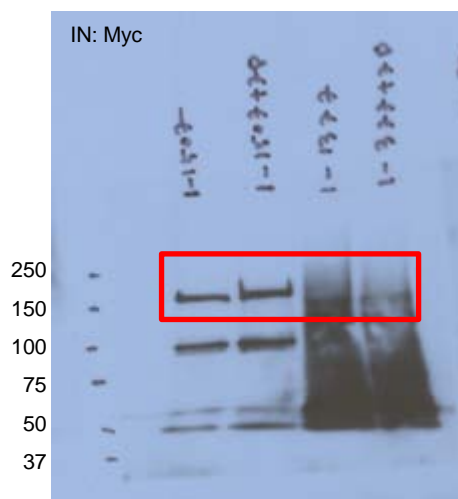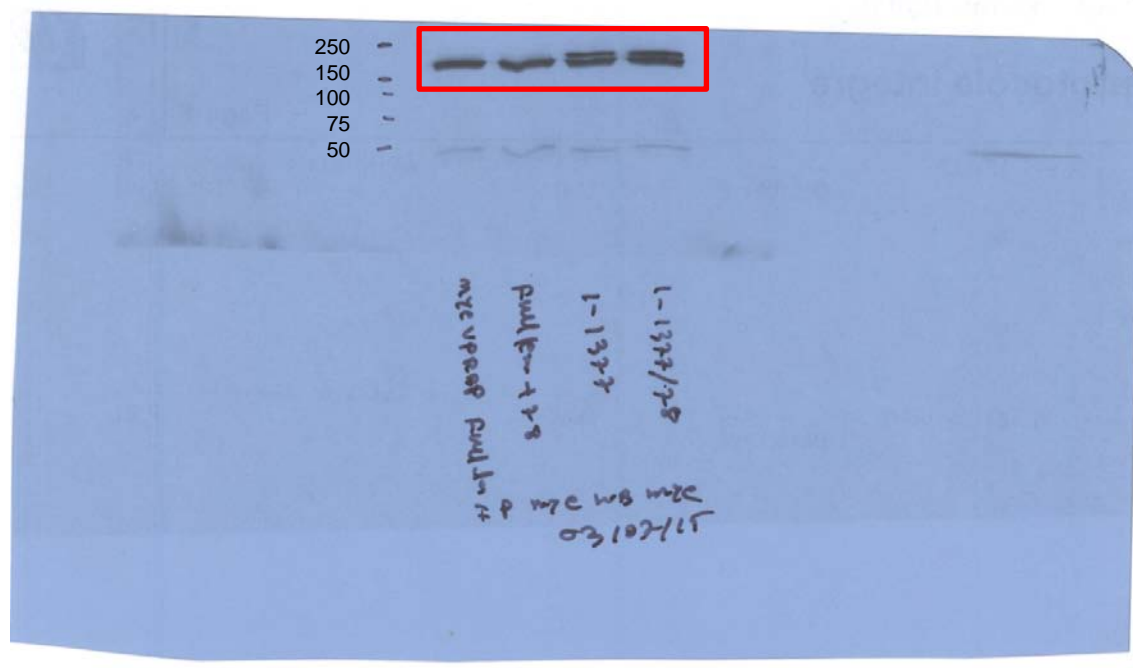

Supplement: EMBR-18-632-s007.pdf [file EMBR-18-632-s007.pdf]
