# Supplementary material
Source: PubMed Central journal article supplement (PMC5376967)

Figure 5 (A)

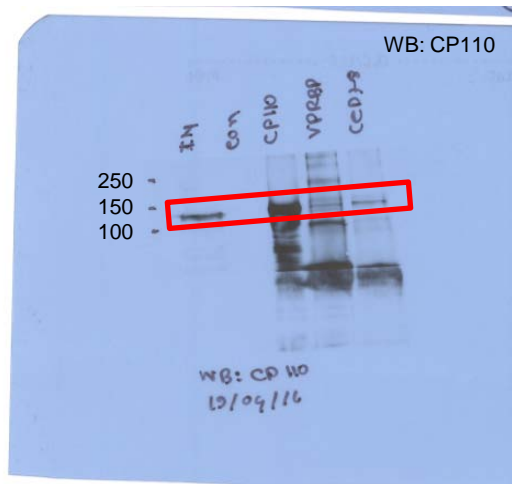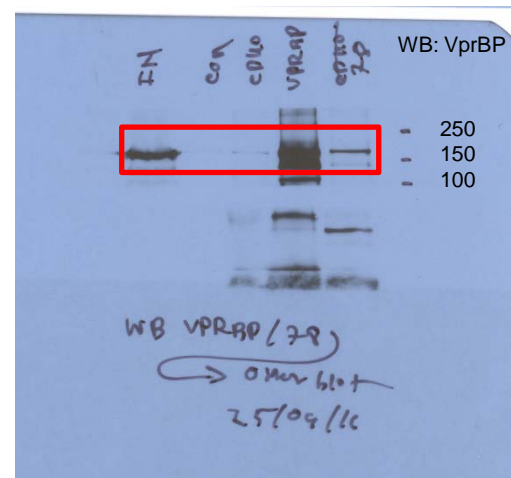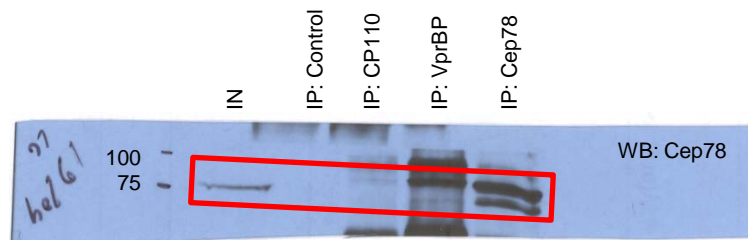

Figure 5 (B)

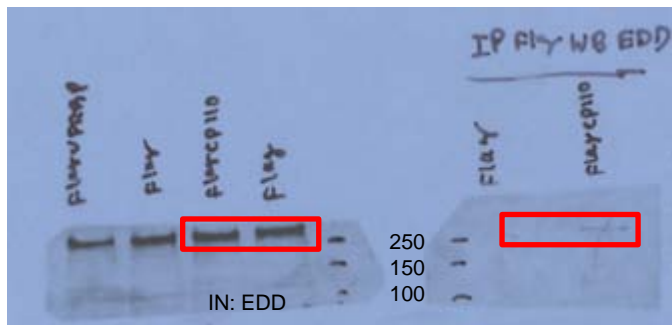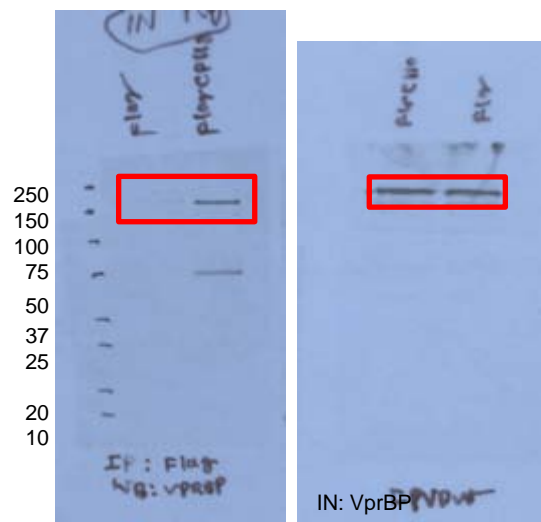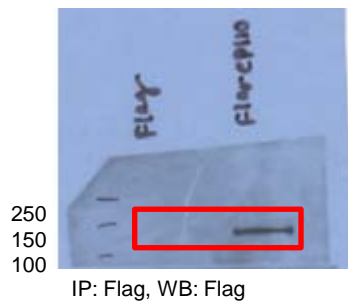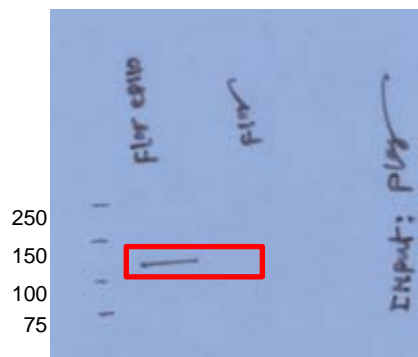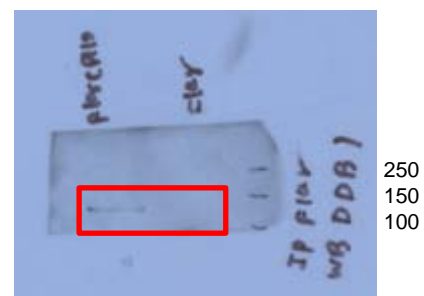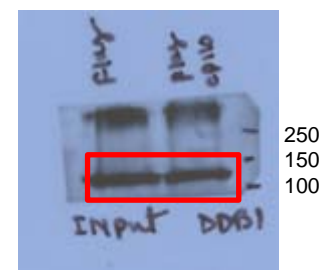

Figure 5 (B)

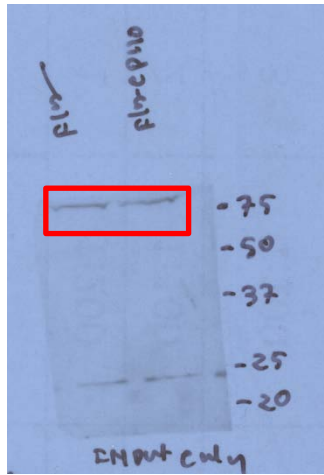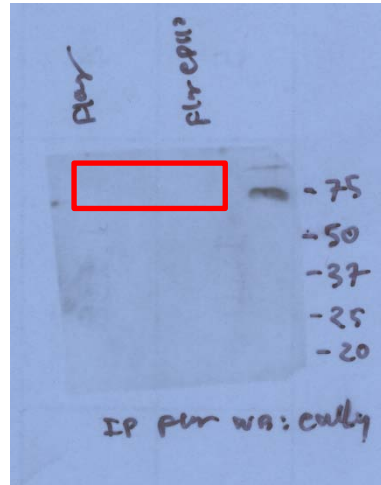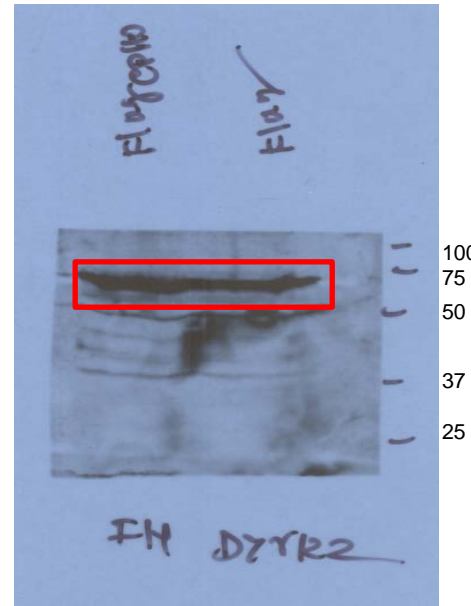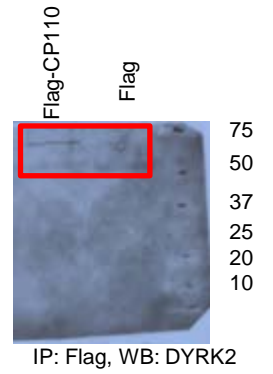

Figure 5 (C)

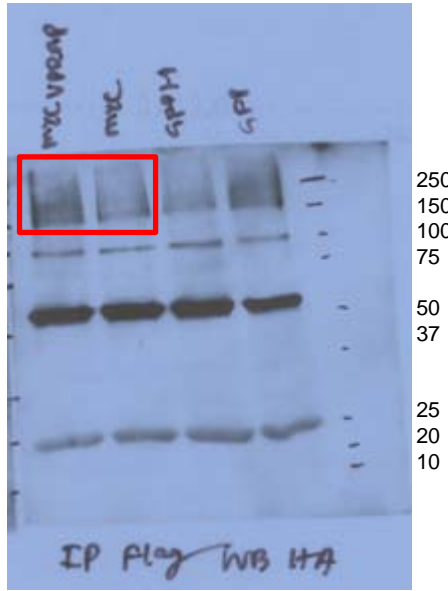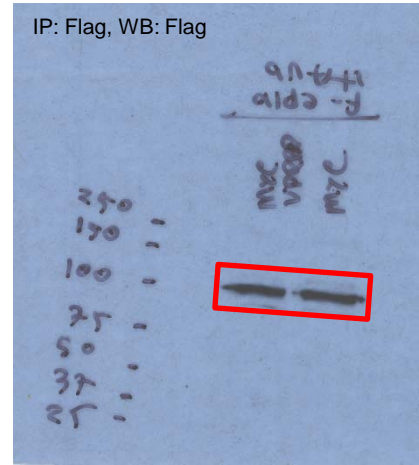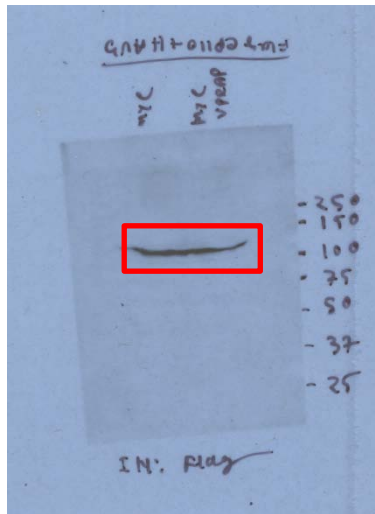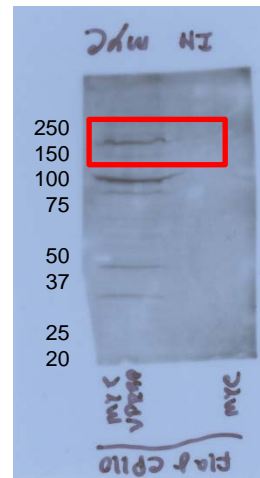

Figure 5 (D)

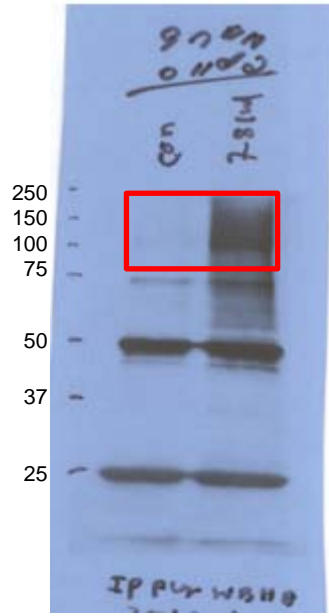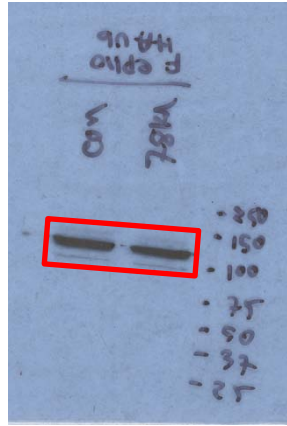

IN: Flag; WB: Flag

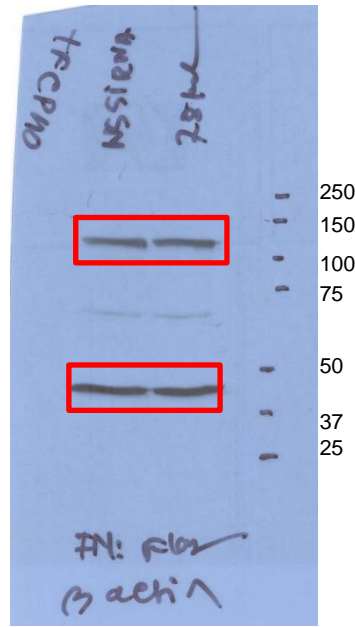

IN: Flag  
WB: actin

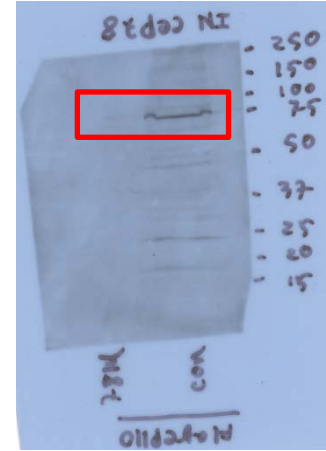

Figure 5 (E)

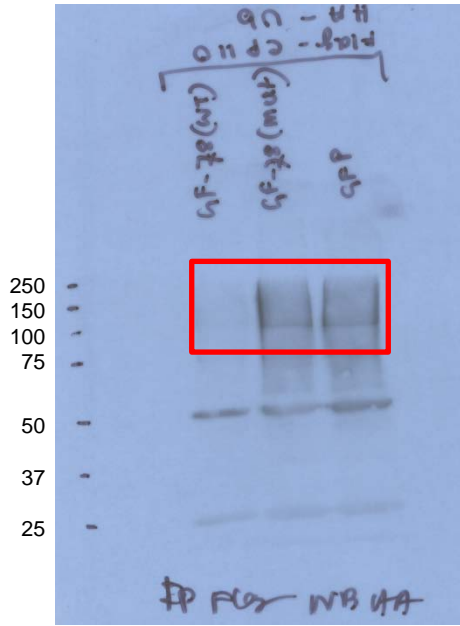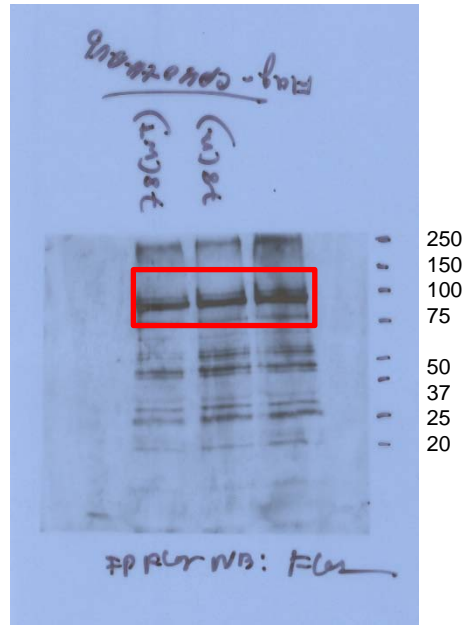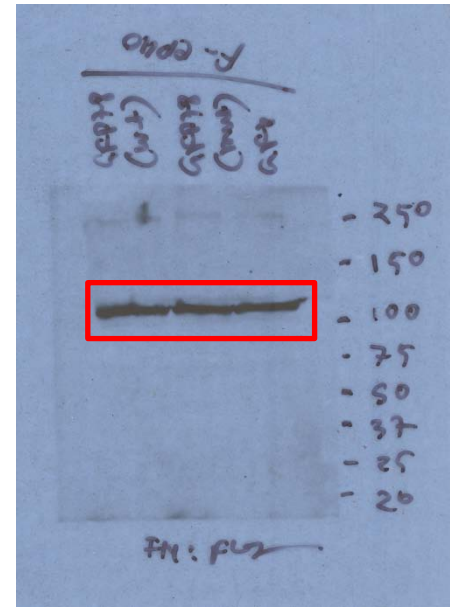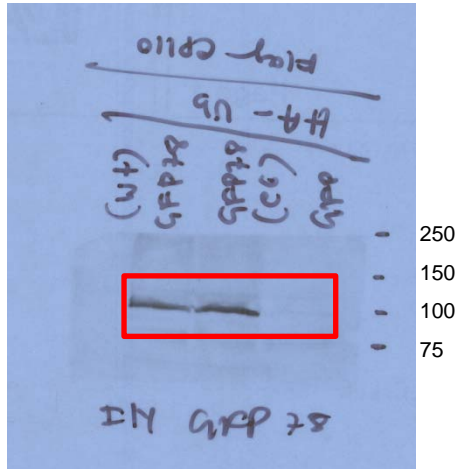



Figure 5 (G & H)

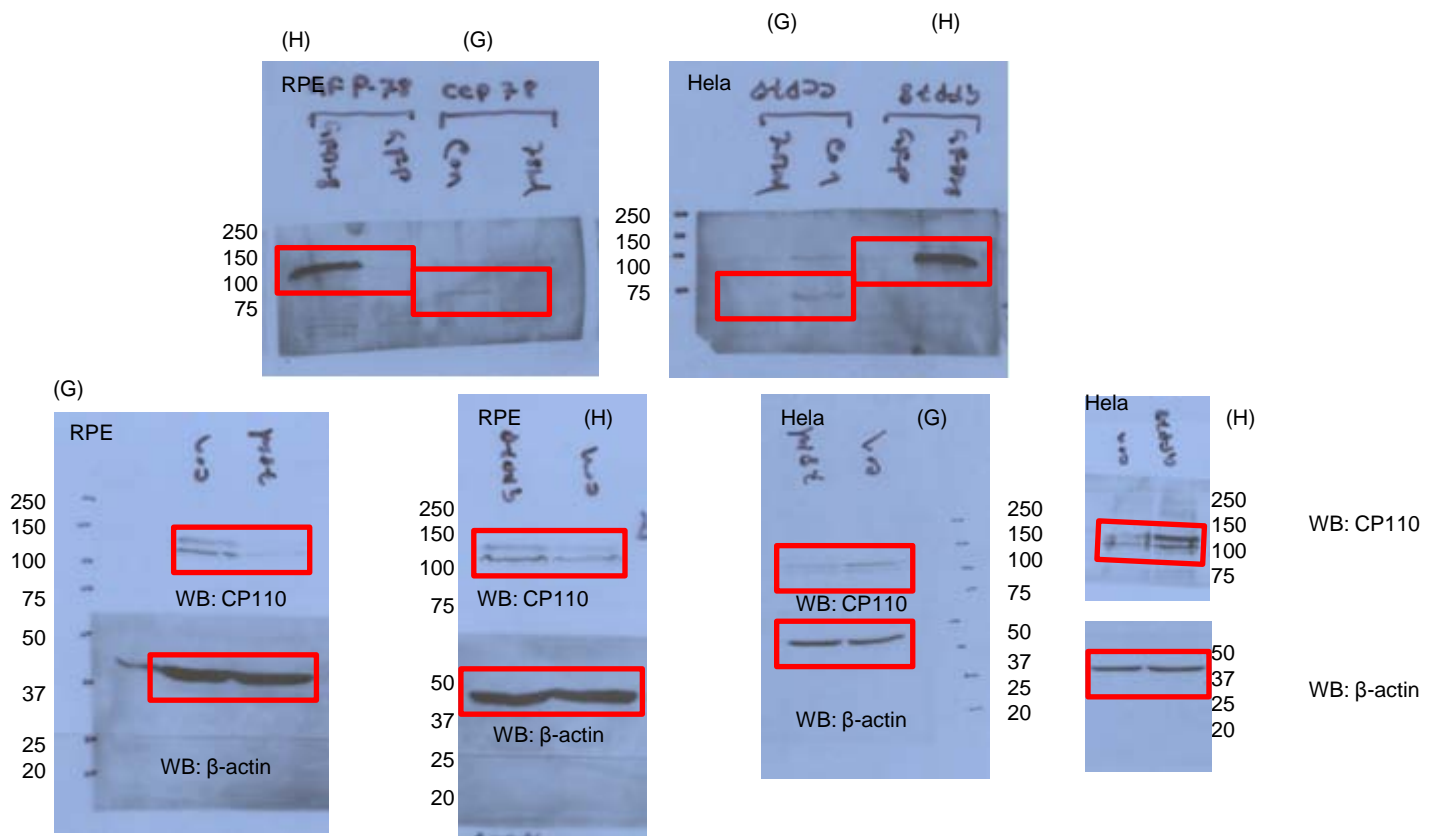



Figure 5 (I)

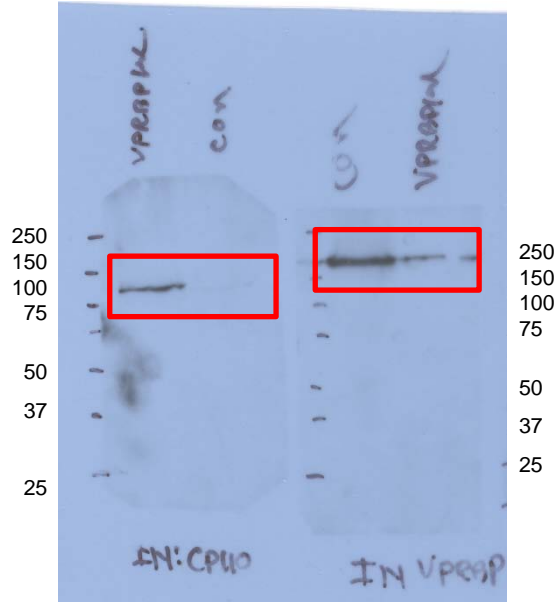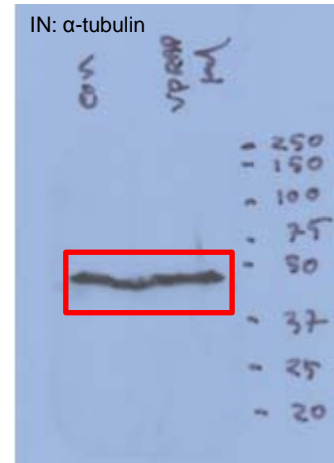

Supplement: EMBR-18-632-s008.pdf [file EMBR-18-632-s008.pdf]
