# Supplementary material
Source: PubMed Central journal article supplement (PMC5376967)

Figure 6 (A1,NS siRNA) - Cep78

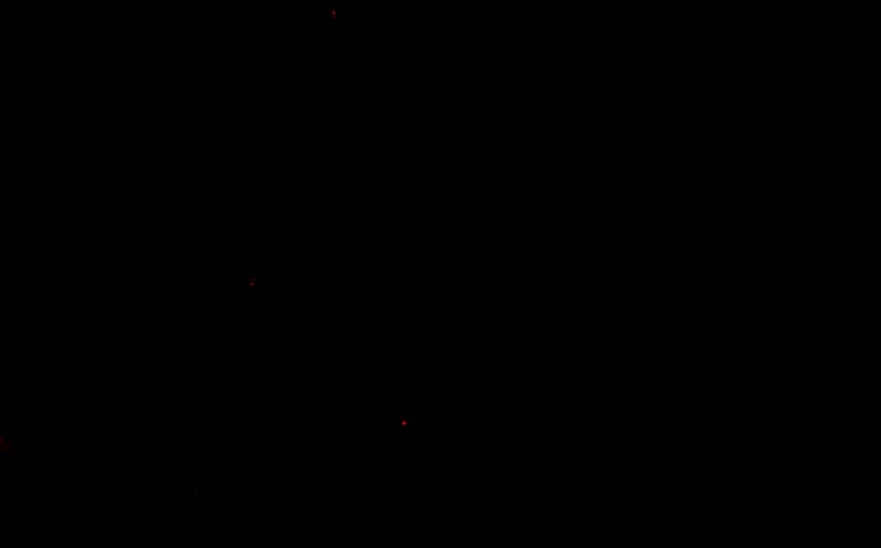

Figure 6 (A1, NS siRNA) - Centrin

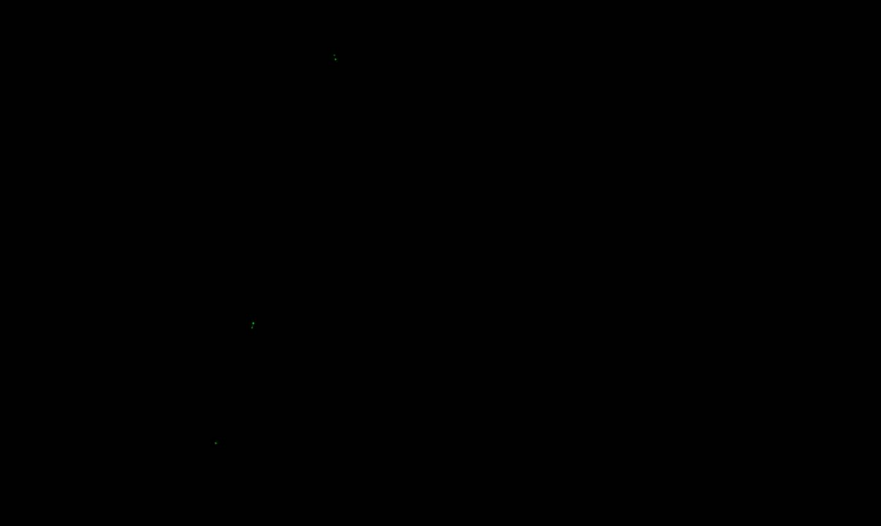

Figure 6 (A1,NS siRNA) - DAPI

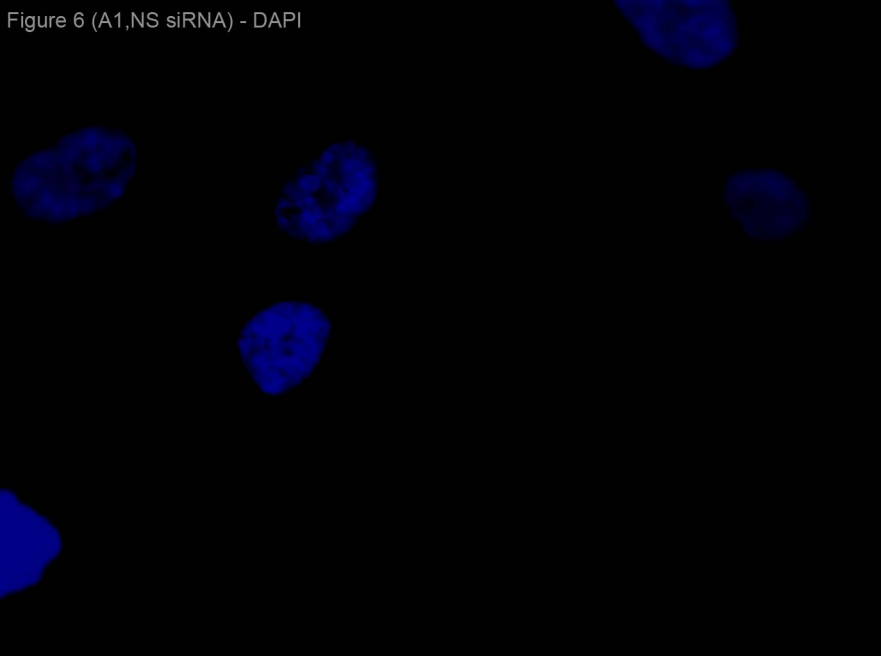

Figure 6 (A1, NS siRNA) - Merge

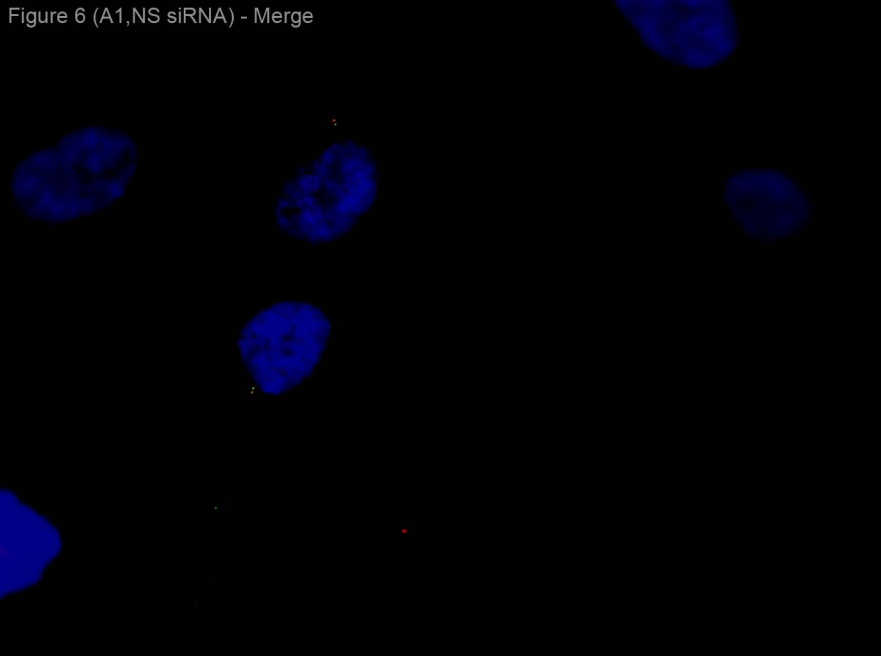

Figure 6 (A2, Cep78 siRNA) - Cep78

Figure 6 (A2, Cep78 siRNA) - Centrin

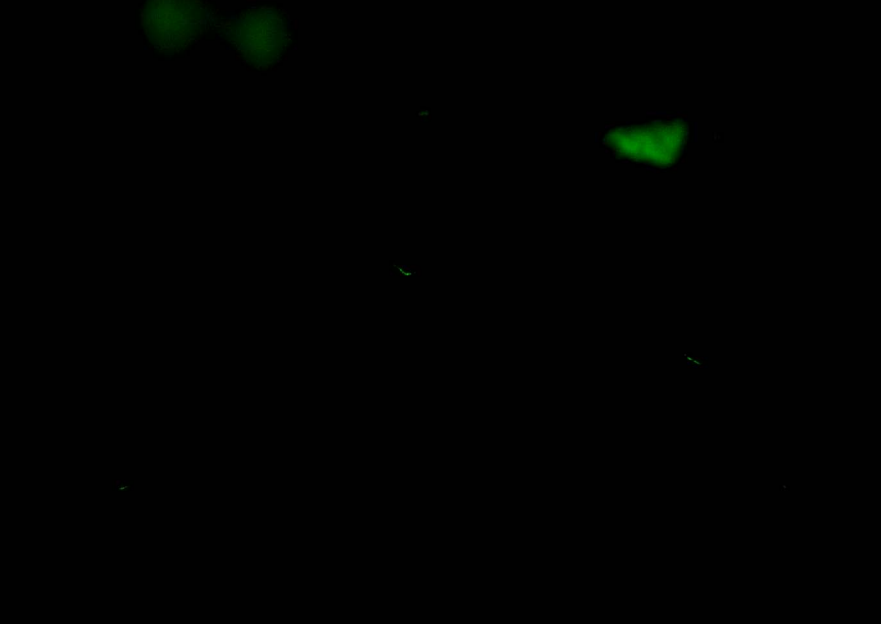

Figure 6 (A2, Cep78 siRNA) - DAPI

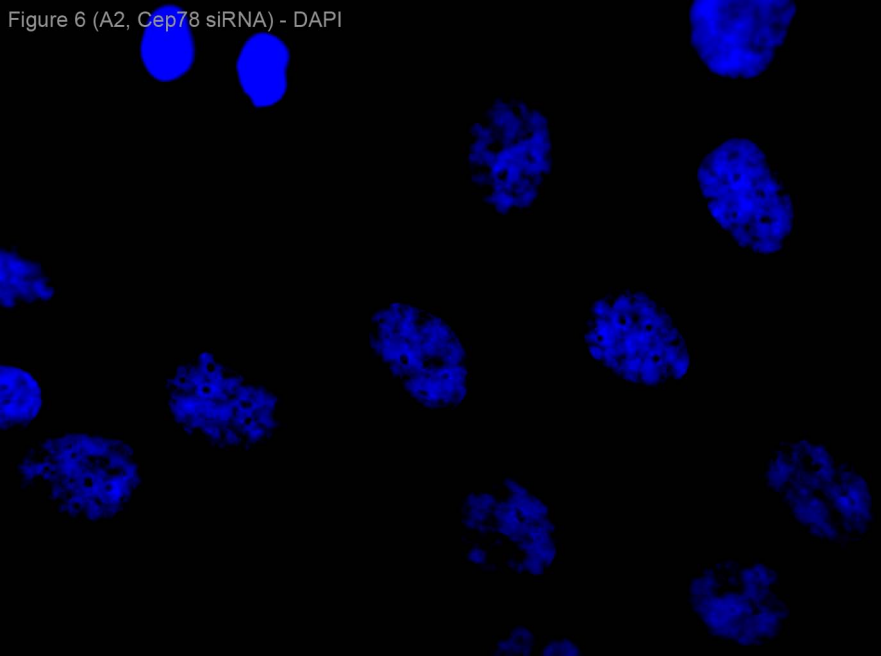

Figure 6 (A2, Cep78 siRNA) - Merge

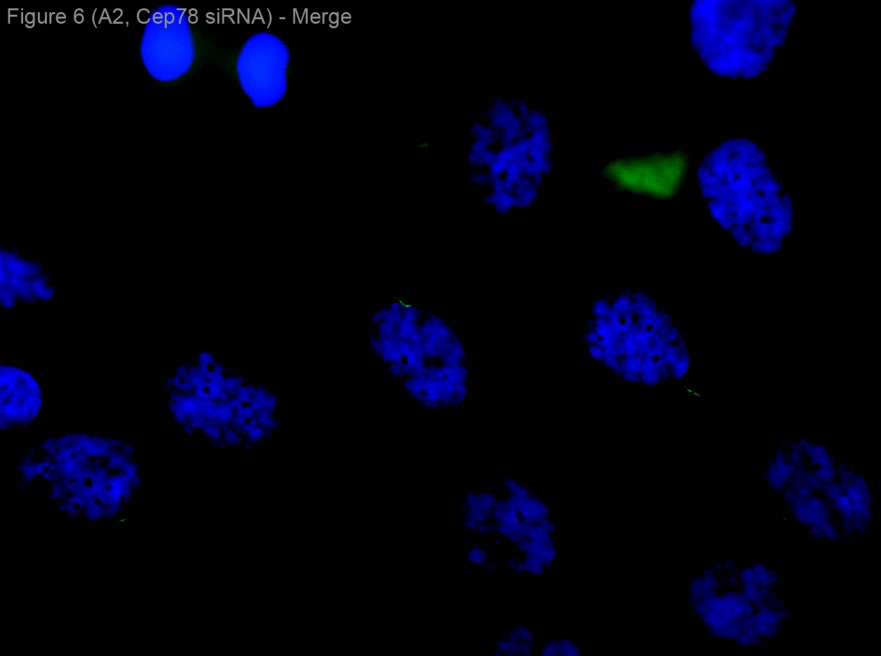



Figure 6 (C1, Control/NS siRNA) - Flag

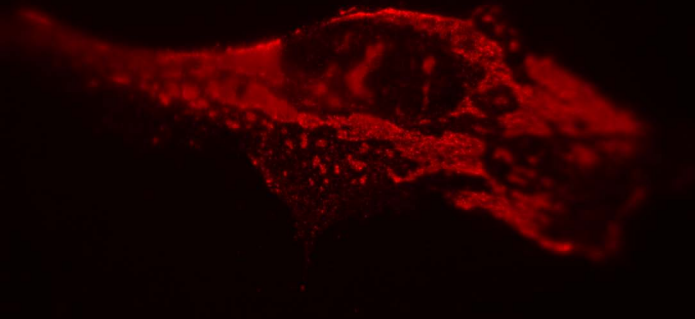

Figure 6 (C1, Control/NS siRNA) - Centrin



A single, small, bright green fluorescent spot is visible in the center of the image, indicating the localization of Centrin in a control cell treated with NS siRNA.

Figure 6 (C1, Control/NS siRNA) - DAPI

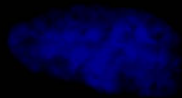

Figure 6 (C1, Control/NS siRNA) - Merge

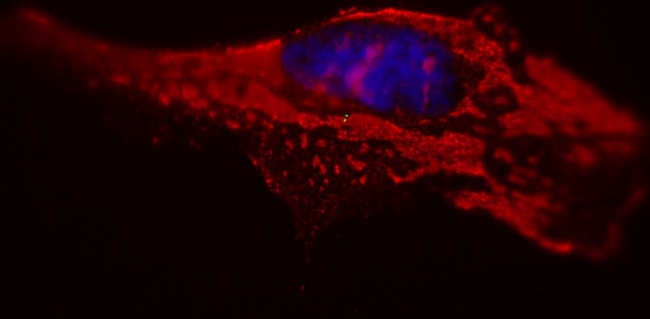

Figure 6 (C2, Control/Cep97 siRNA) - Flag

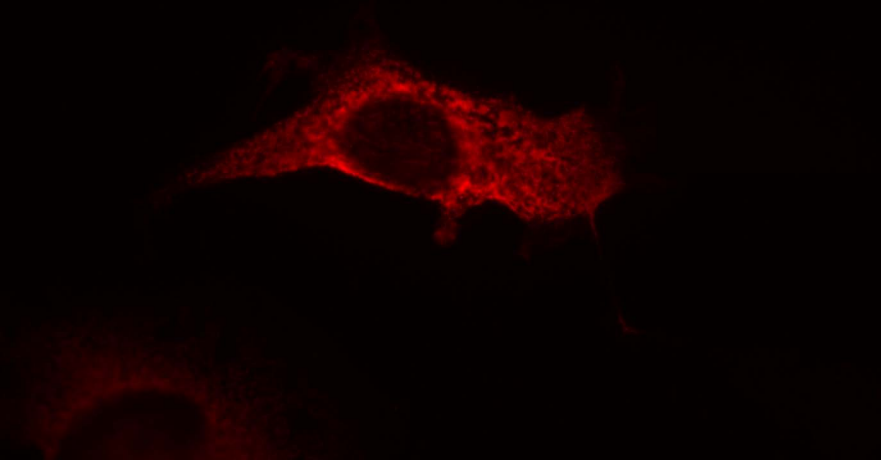

Figure 6 (C2, Control/Cep97 siRNA) - Centrin

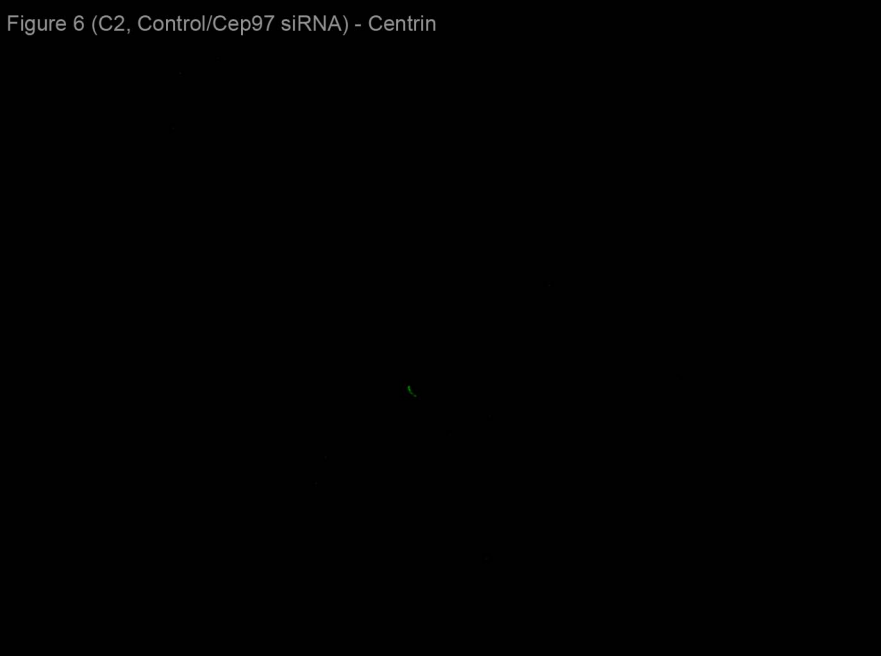

Figure 6 (C2, Control/Cep97 siRNA) - DAPI

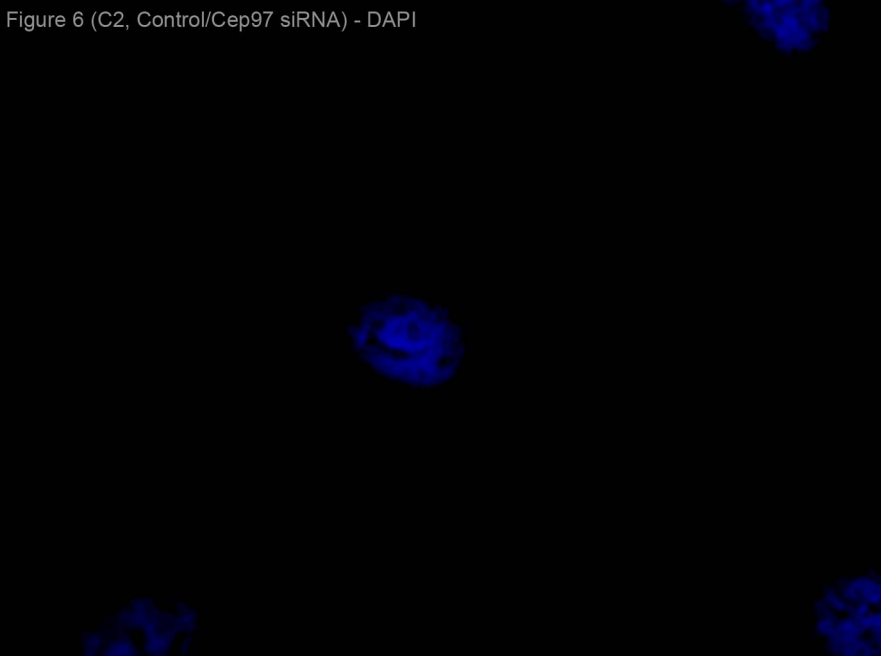

Figure 6 (C2, Control/Cep97 siRNA) - Merge

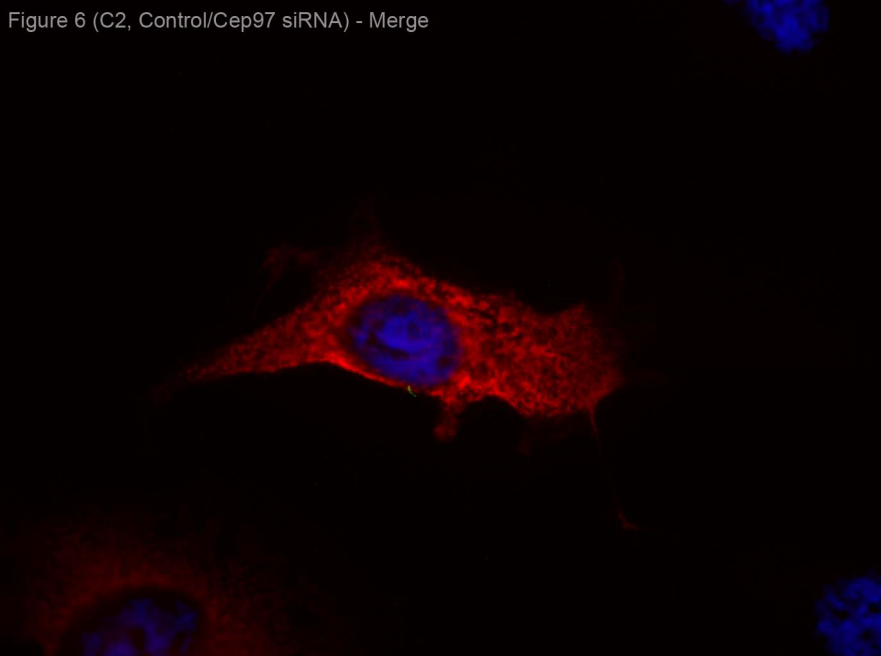



Figure 6 (C3, Flag-Cep78 (1-722)/Cep97 siRNA) - Flag

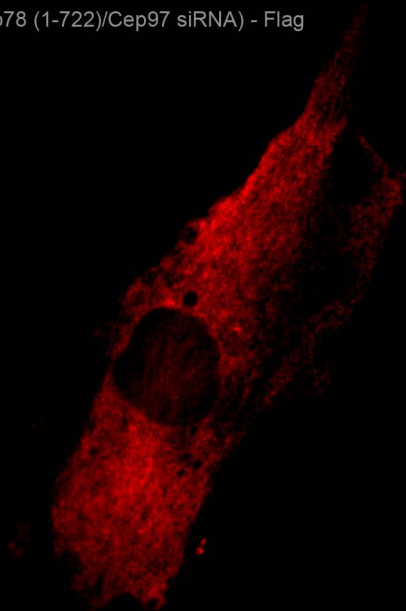

Figure 6 (C3, Flag-Cep78 (1-722)/Cep97 siRNA) - Centrin

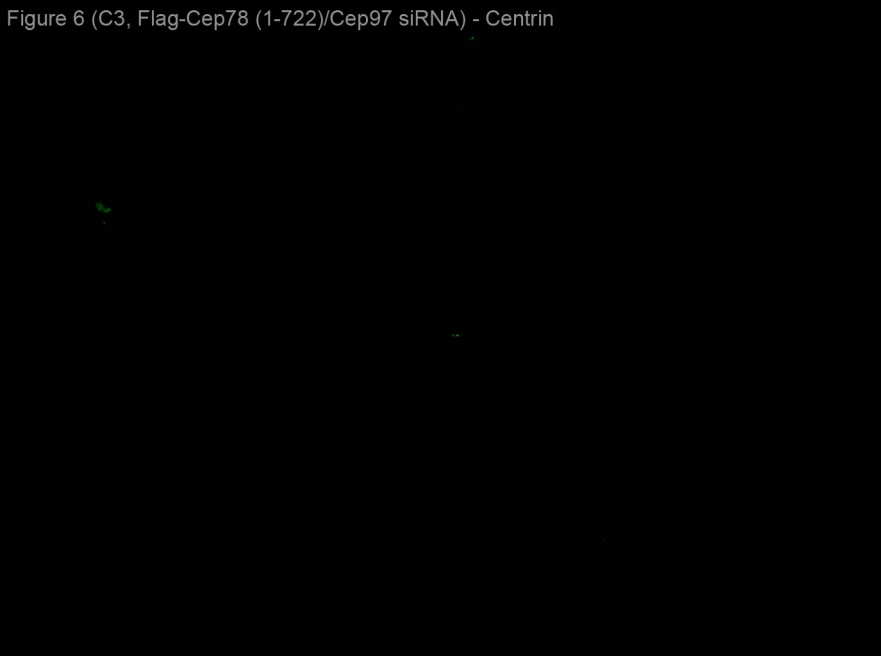

Figure 6 (C3, Flag-Cep78 (1-722)/Cep97 siRNA) - DAPI

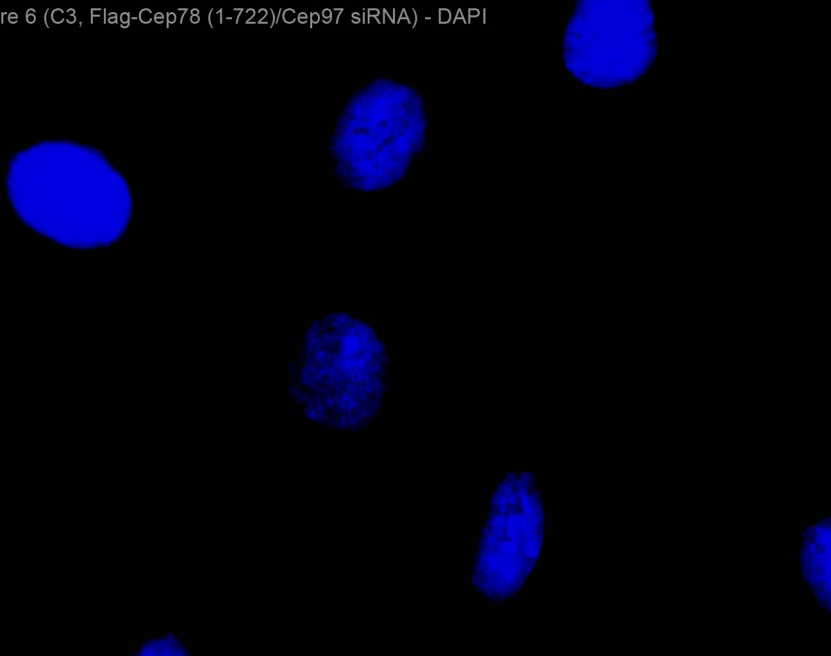

Figure 6 (C3, Flag-Cep78 (1-722)/Cep97 siRNA) - Merge

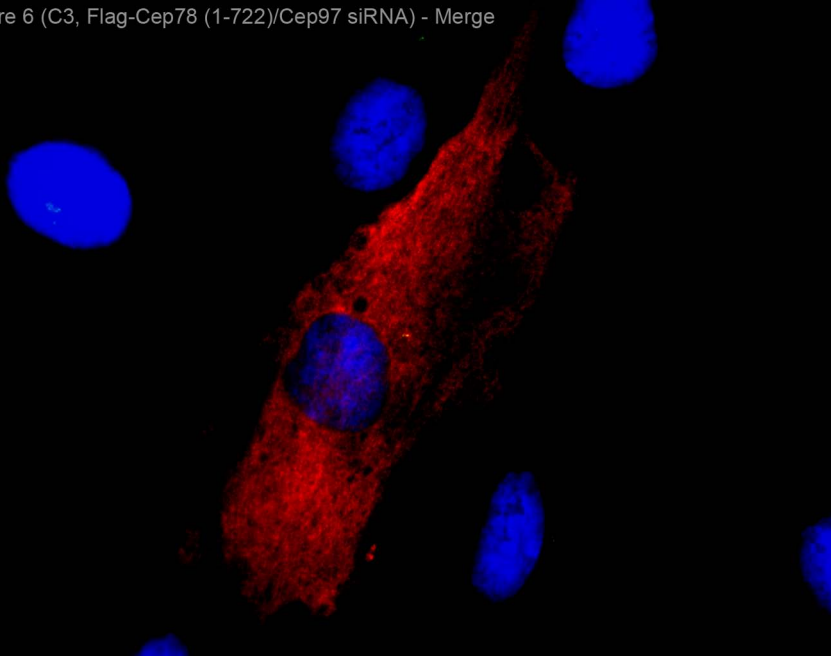

Figure 6 (C4, Flag-Cep78(1-722D290A))/Cep97 siRNA) - Flag

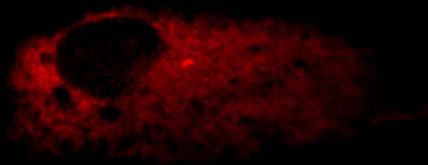

Figure 6 (C4, Flag-Cep78(1-722D290A))/Cep97 siRNA) - Centrin

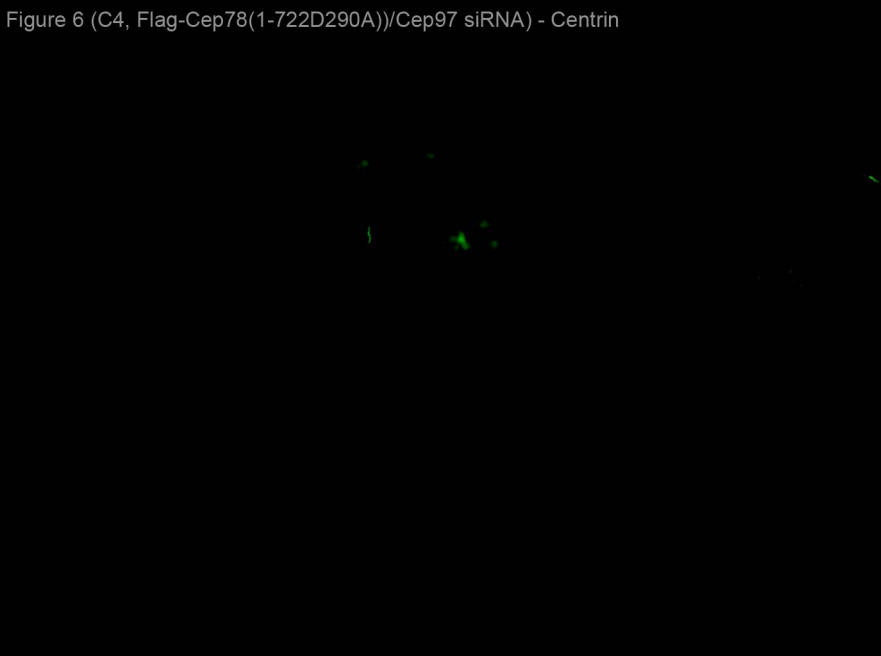

Figure 6 (C4, Flag-Cep78(1-722D290A))/Cep97 siRNA - DAPI

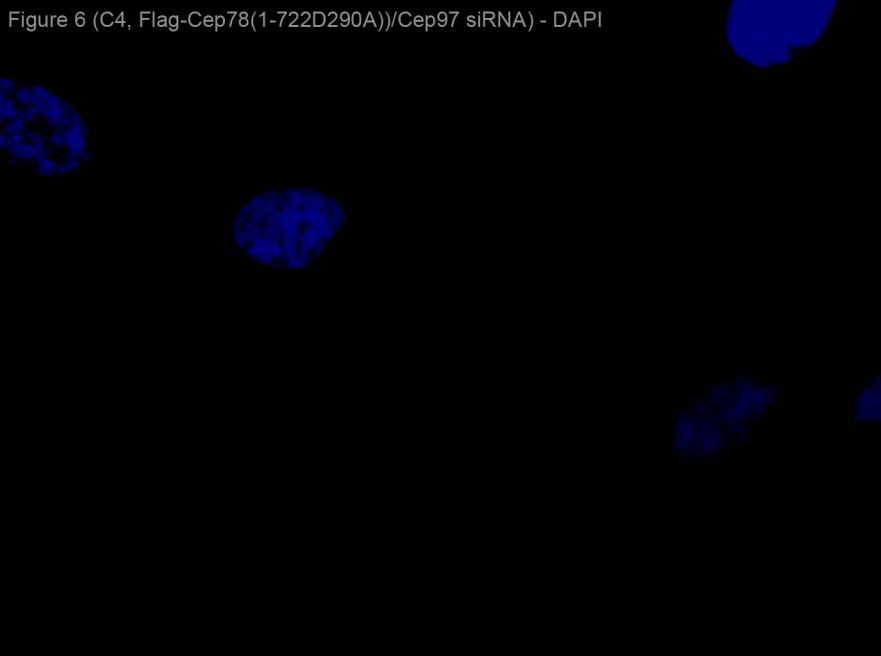

Figure 6 (C4, Flag-Cep78(1-722D290A))/Cep97 siRNA - Merge

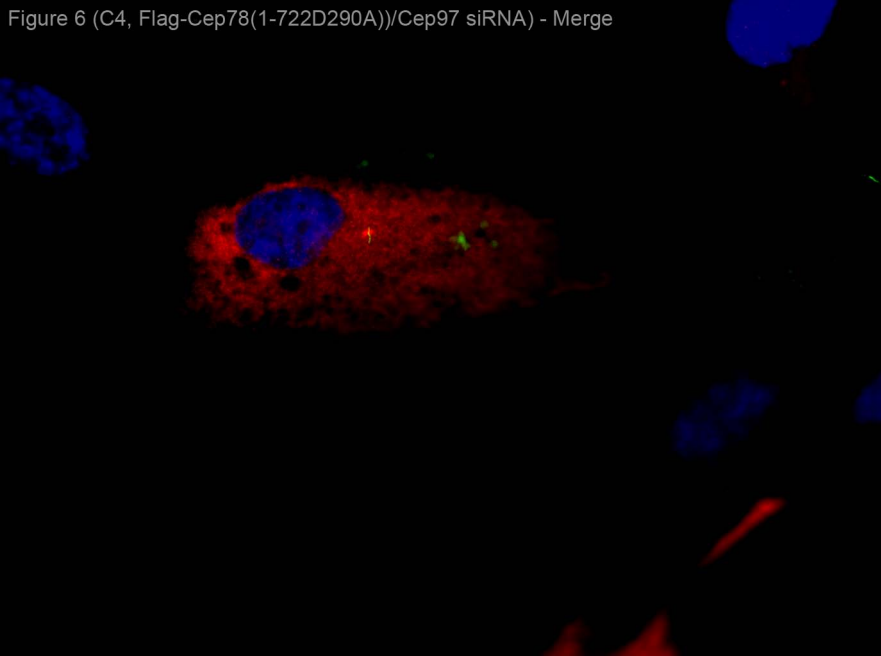



Figure 6 (E1, Control) - Flag

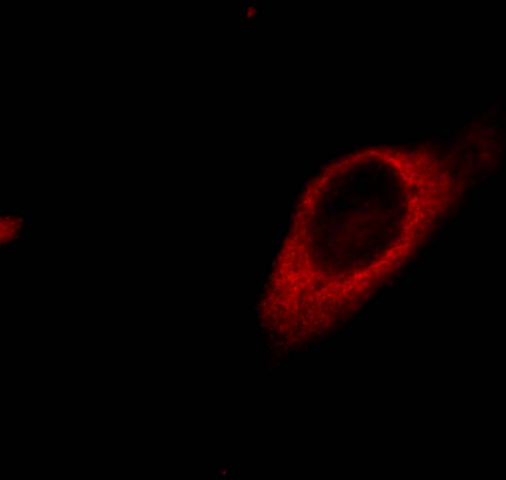

Figure 6 (E1, Control) - Centrin

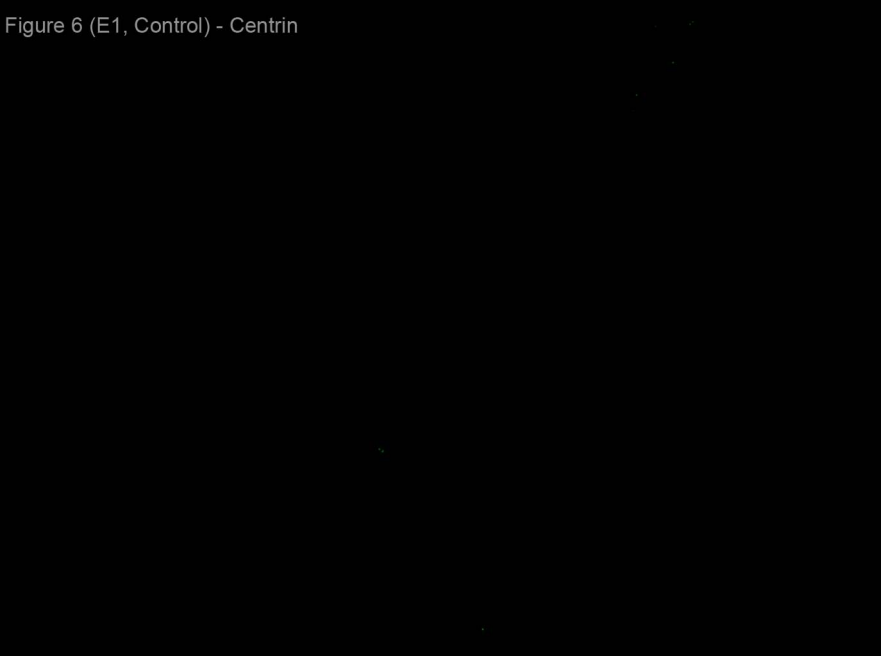

Figure 6 (E1, Control) - DAPI

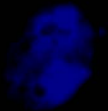

Figure 6 (E1, Control) - Merge

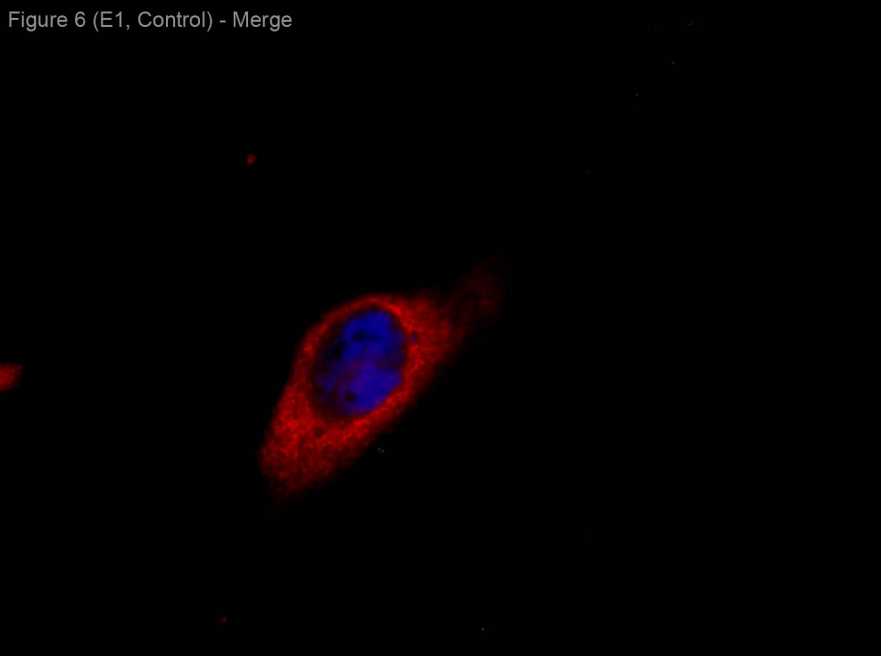

Figure 6 (E2, Flag-VprBP) - Flag

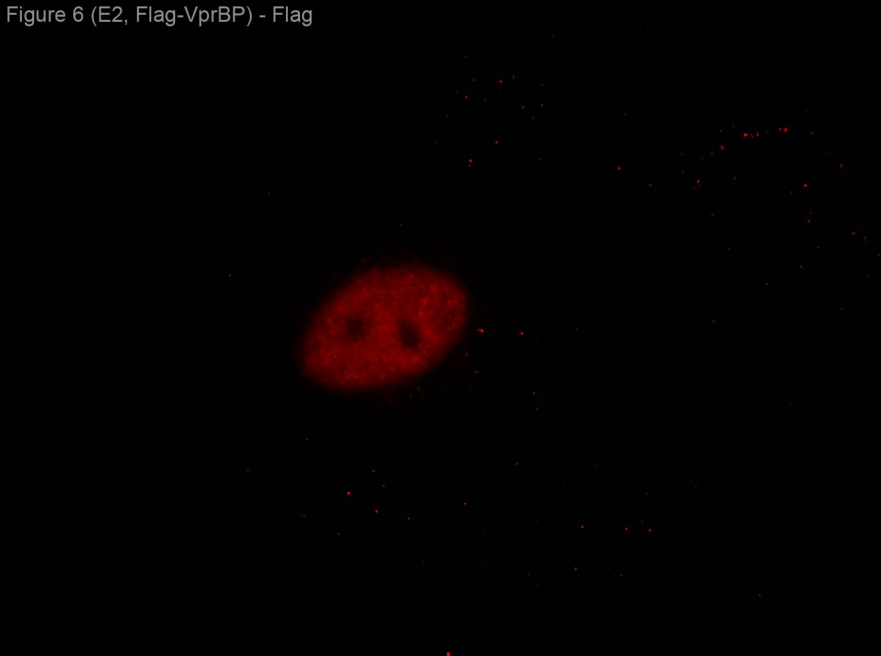

Figure 6 (E2, Flag-VprBP) - Centrin

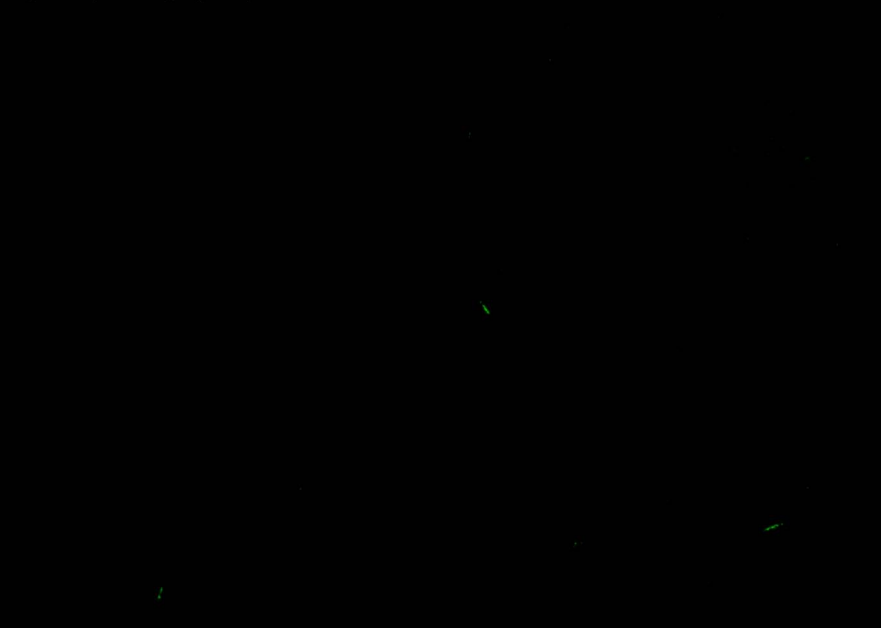

Figure 6 (E2, Flag-VprBP) - DAPI

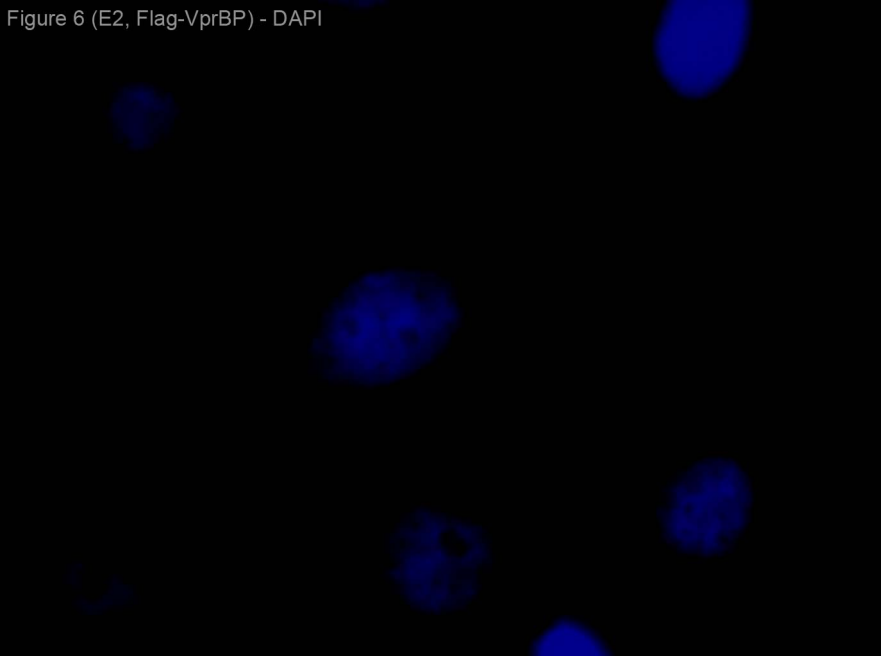

Figure 6 (E2, Flag-VprBP) - Merge

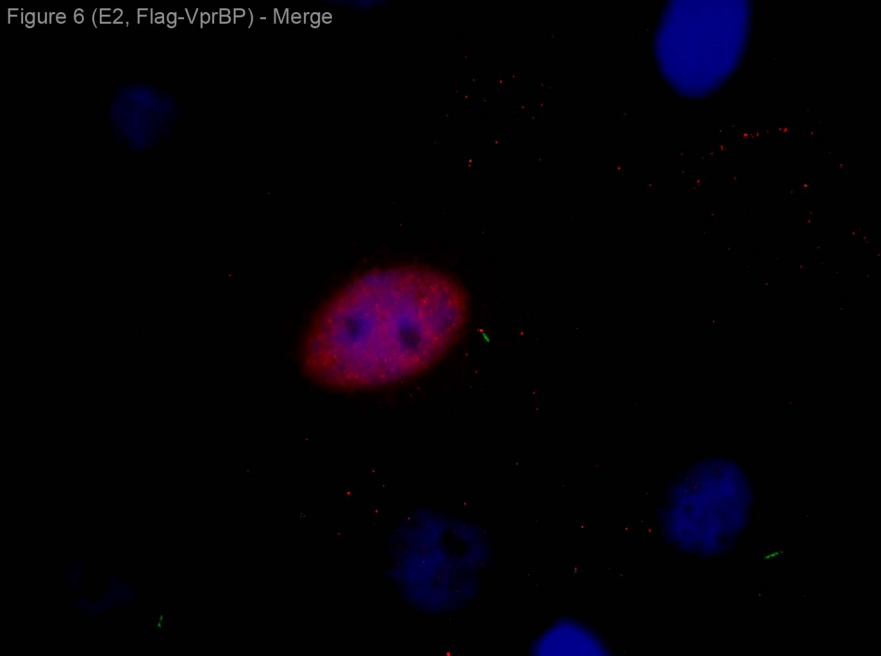



Figure 6 (E3, Flag-EDD) - Flag

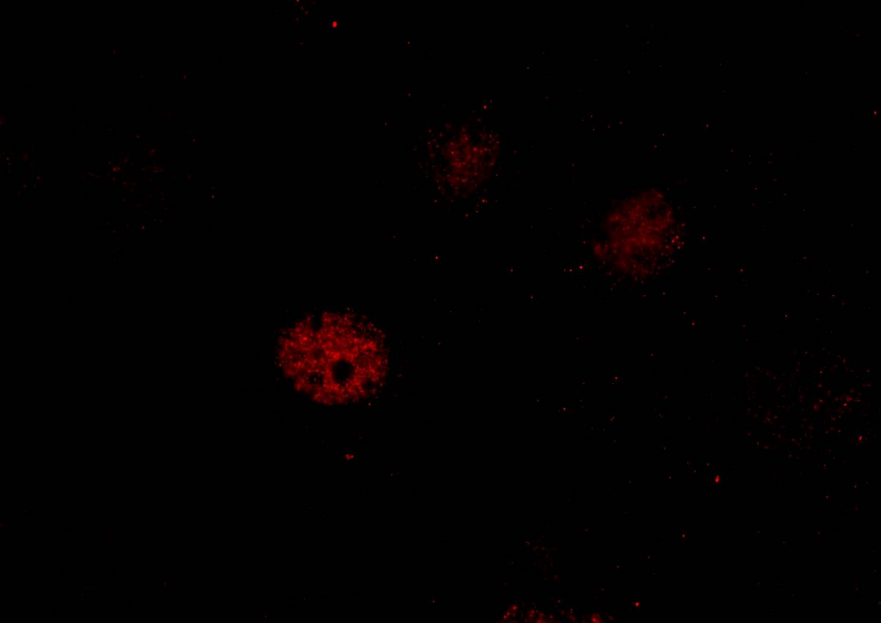

Figure 6 (E3, Flag-EDD) - Centrin

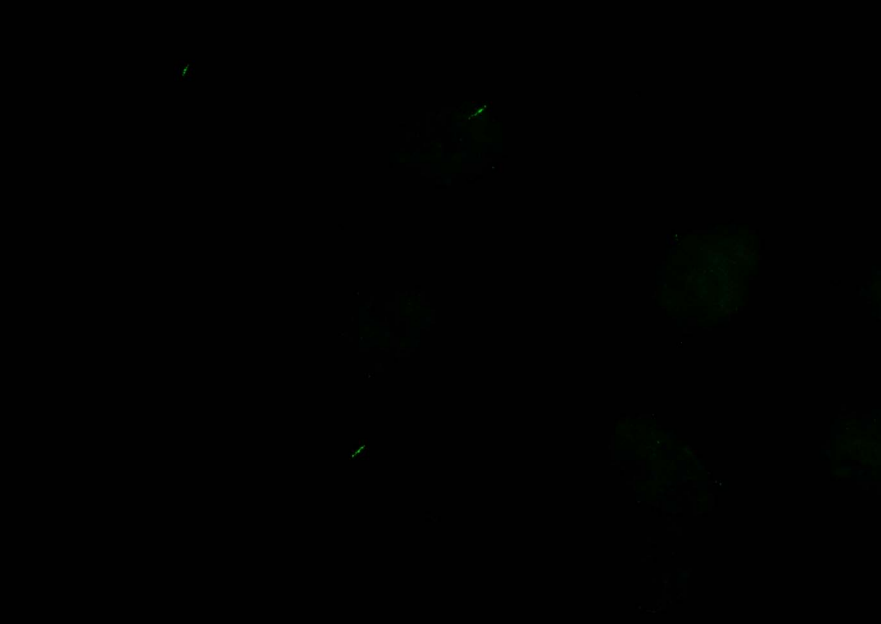

Figure 6 (E3, Flag-EDD) - DAPI

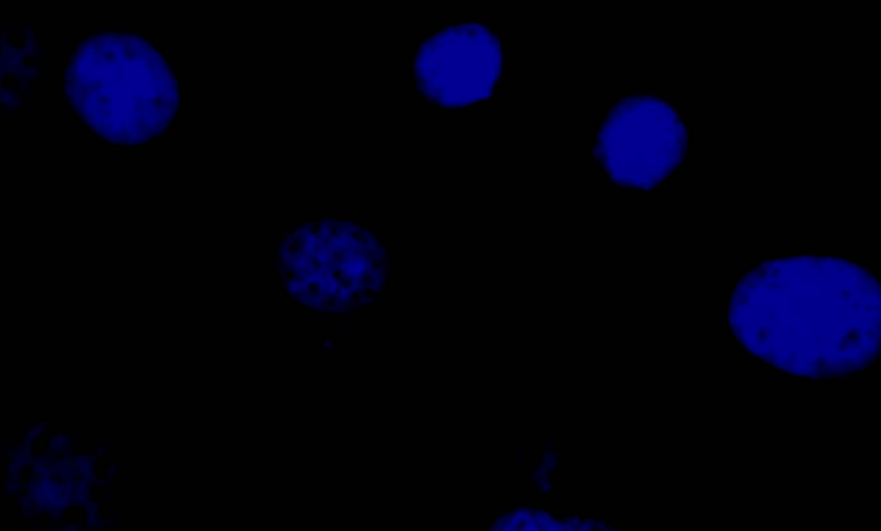

Figure 6 (E3, Flag-EDD) - Merge

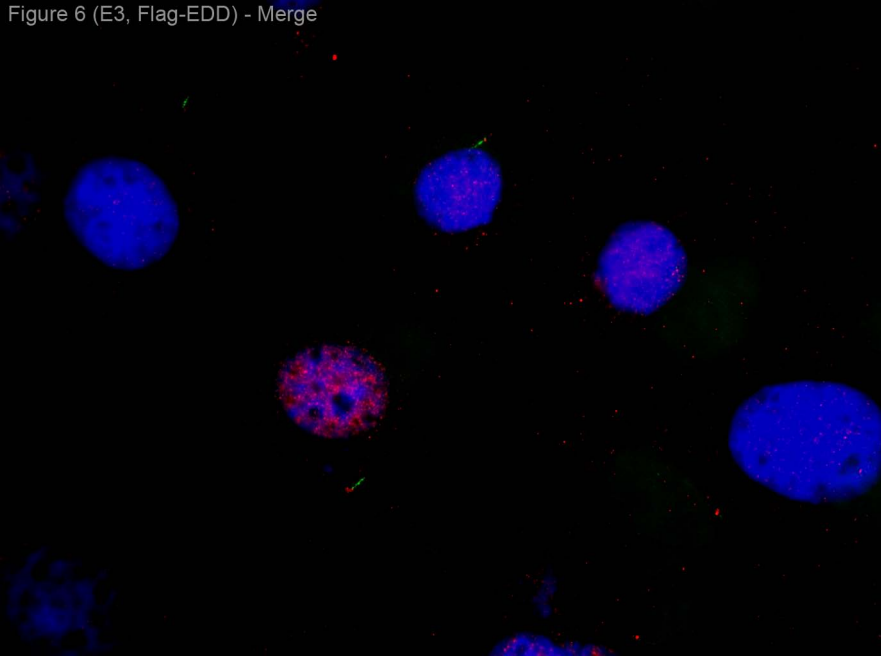

Figure 6 (G1, Control) - Flag

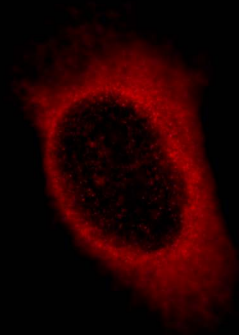

Figure 6 (G1, Control) - GT335

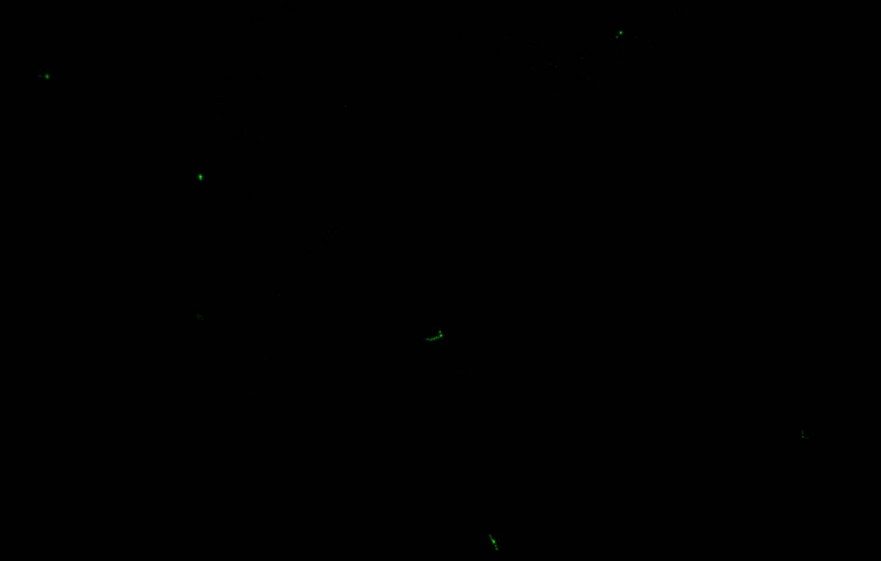

Figure 6 (G1, Control) - DAPI

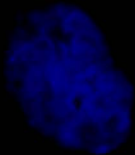

Figure 6 (G1, Control) - Merge

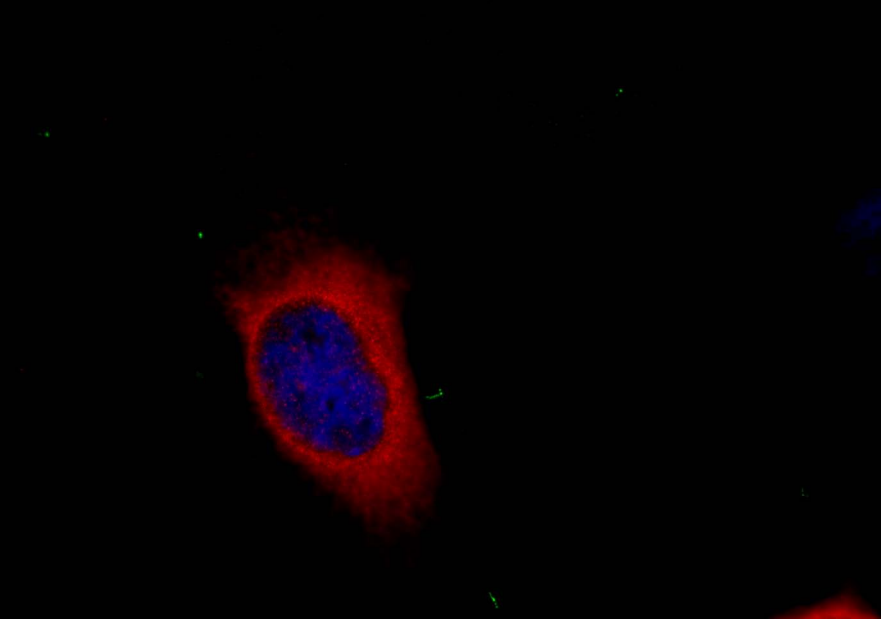



Figure 6 (G2, Flag-Cep78(1-722)) - Flag

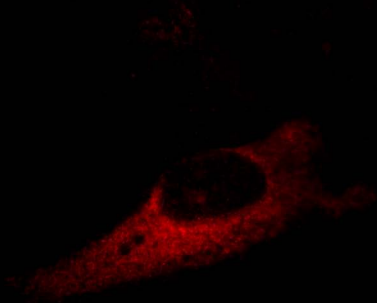

Figure 6 (G2, Flag-Cep78(1-722)) - GT335

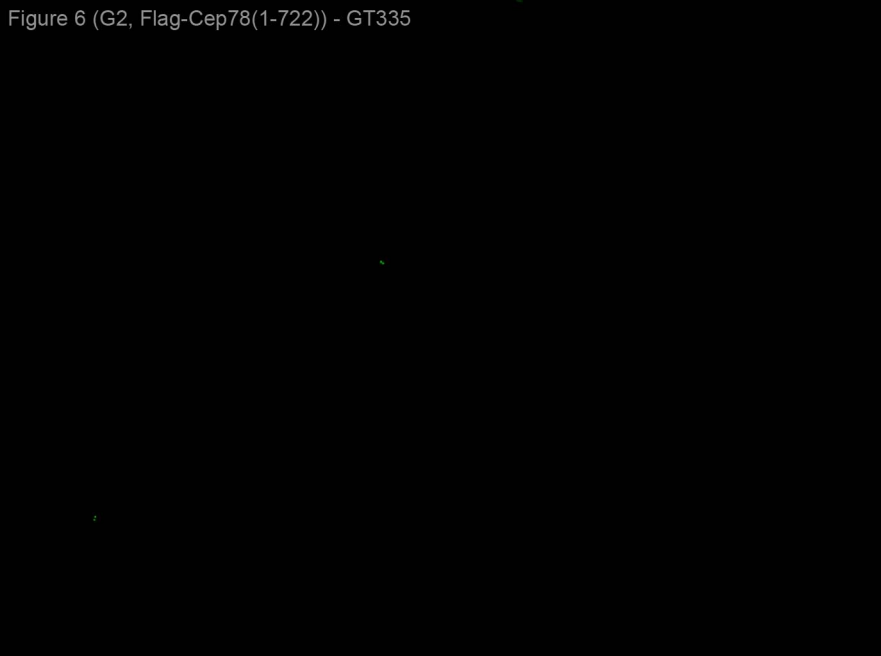

Figure 6 (G2, Flag-Cep78(1-722)) - DAPI

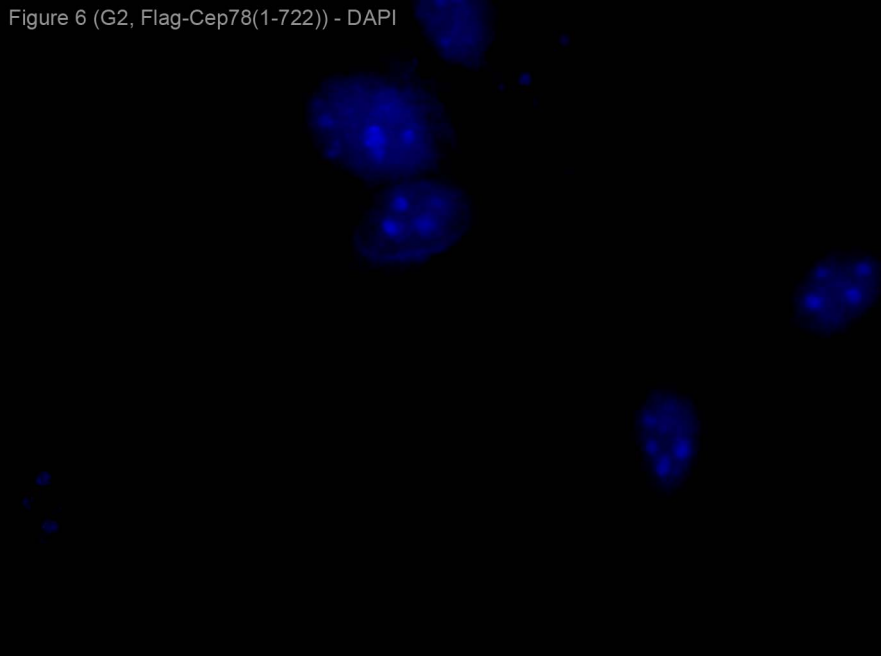

Figure 6 (G2, Flag-Cep78(1-722)) - Merge

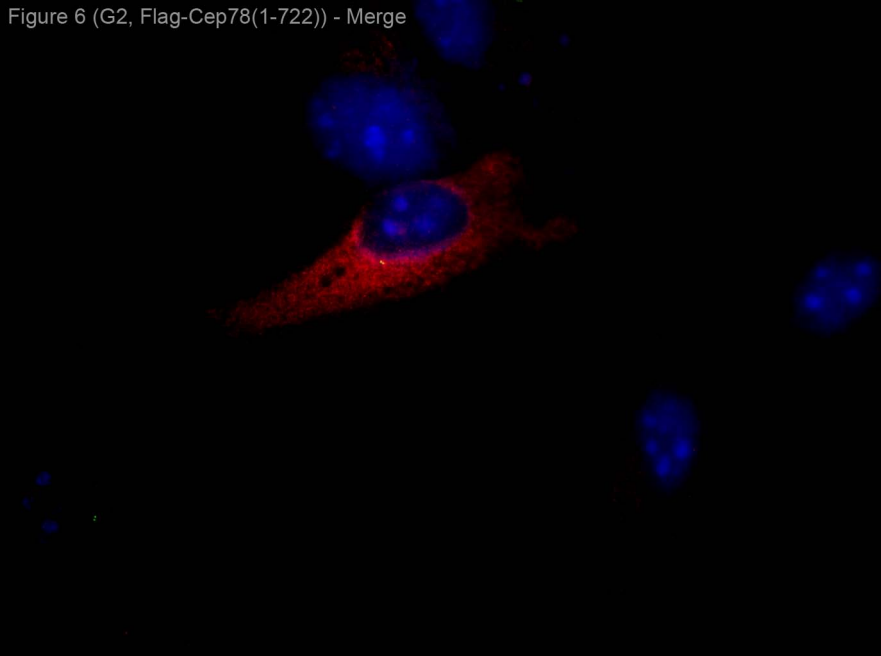

Figure 6 (G3, Flag-Cep78(1-722D290)) - Flag

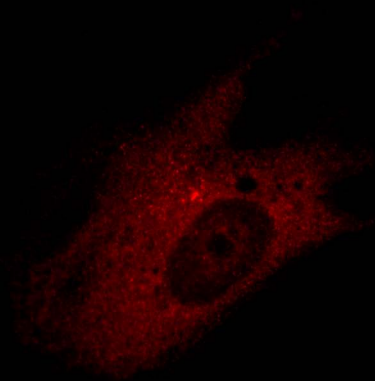

Figure 6 (G3, Flag-Cep78(1-722D290)) - GT335

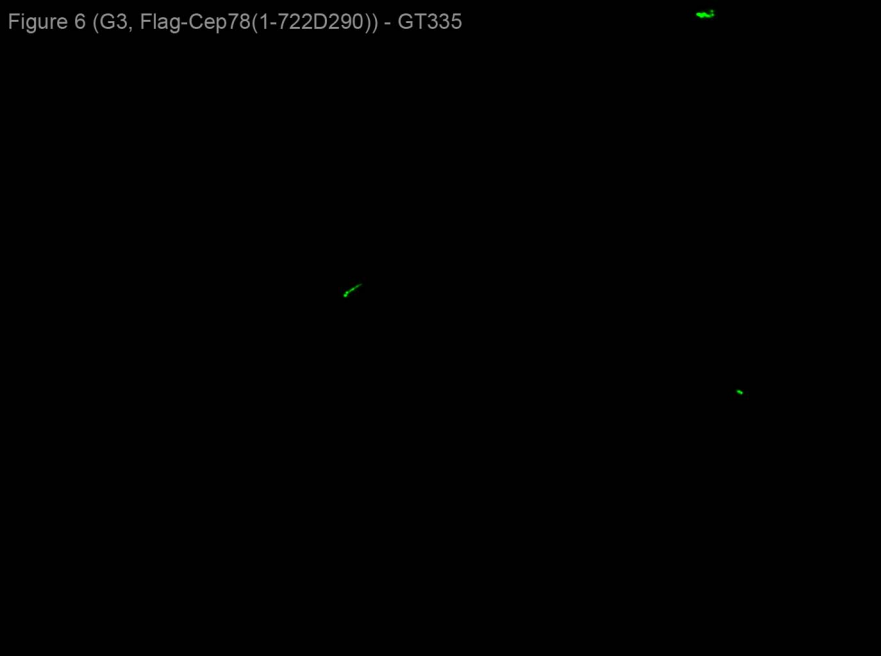

Figure 6 (G3, Flag-Cep78(1-722D290)) - DAPI

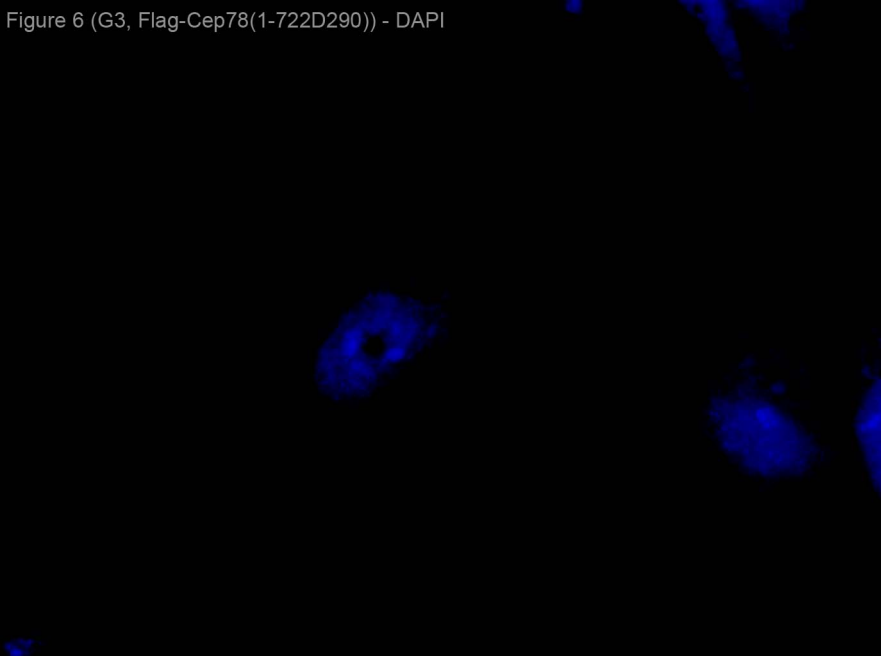

Figure 6 (G3, Flag-Cep78(1-722D290)) - Merge

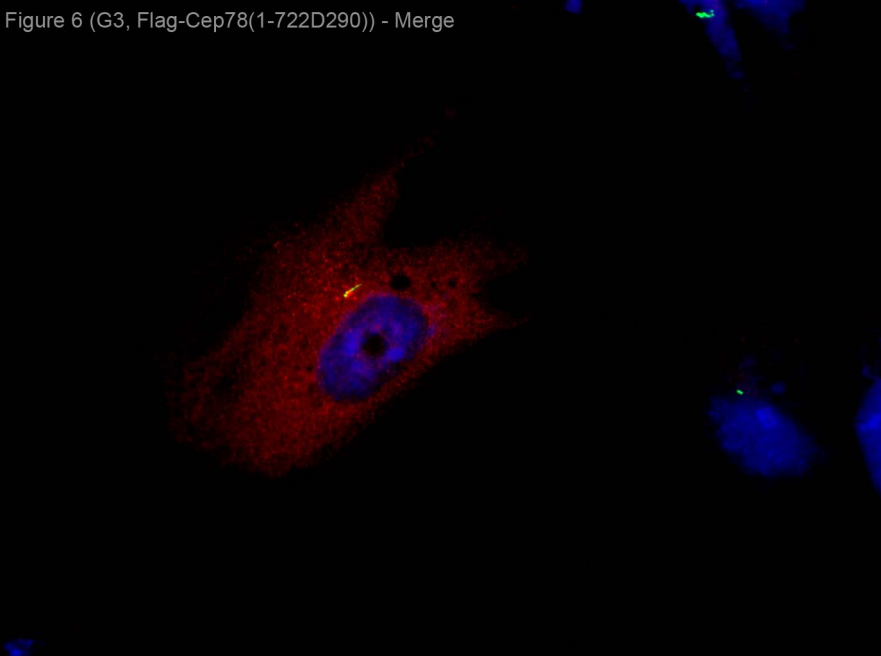



Figure 6 (I1, Control) - Flag

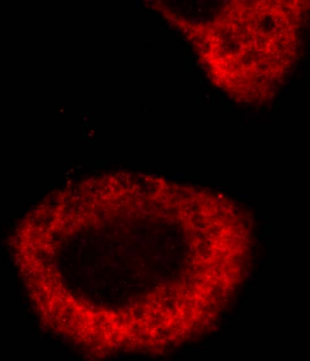

Figure 6 (I1, Control) - GT335

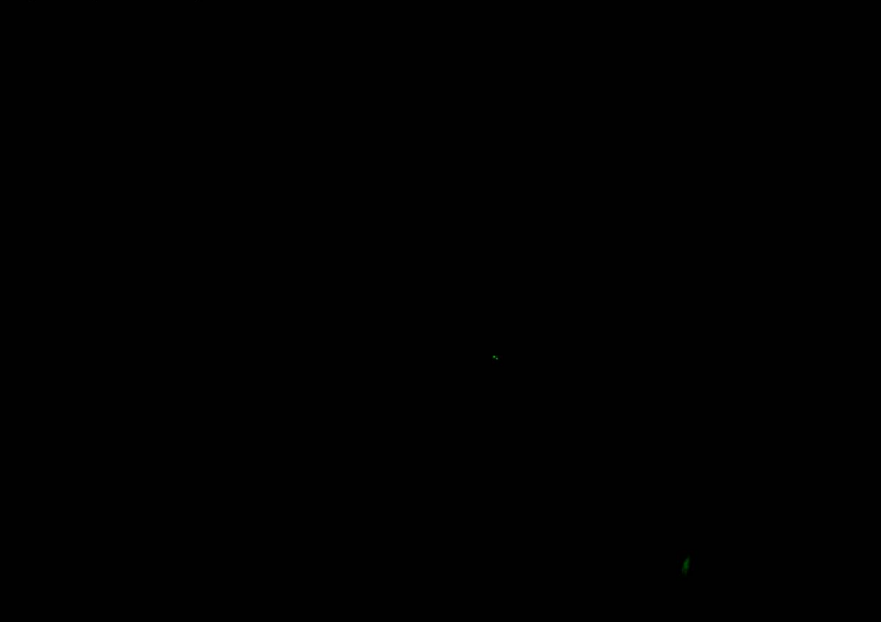

Figure 6 (I1, Control) - DAPI

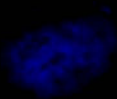

Figure 6 (I1, Control) - Merge

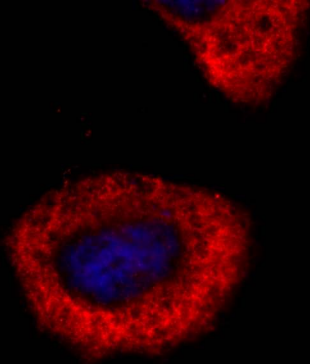

Figure 6 (I2, Flag-VprBP) - Flag

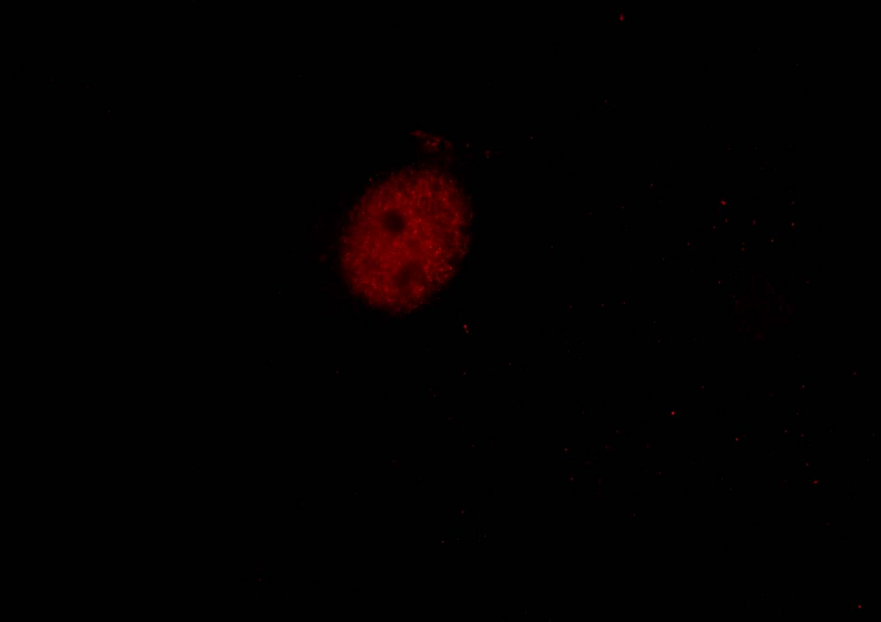

Figure 6 (I2, Flag-VprBP) - GT335

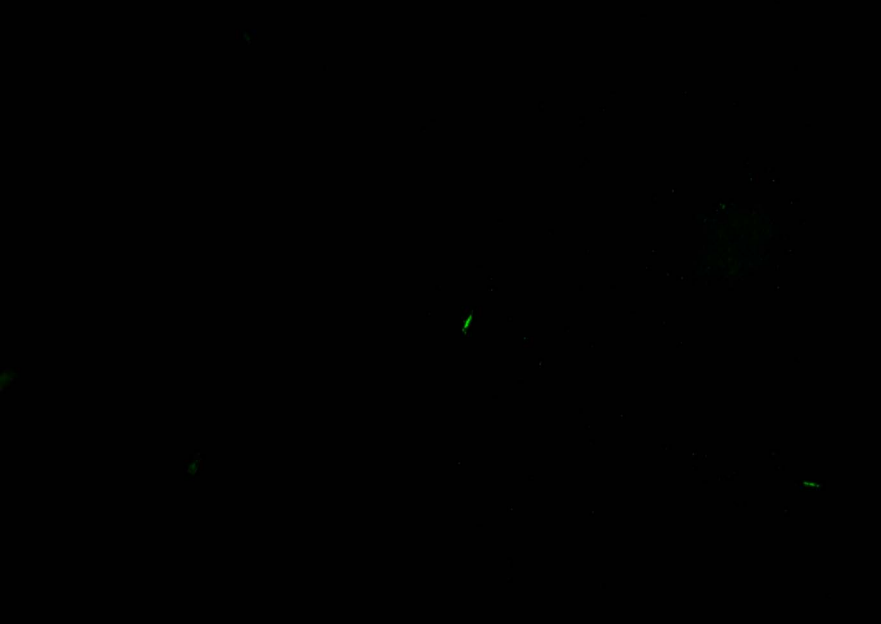

Figure 6 (I2, Flag-VprBP) - DAPI

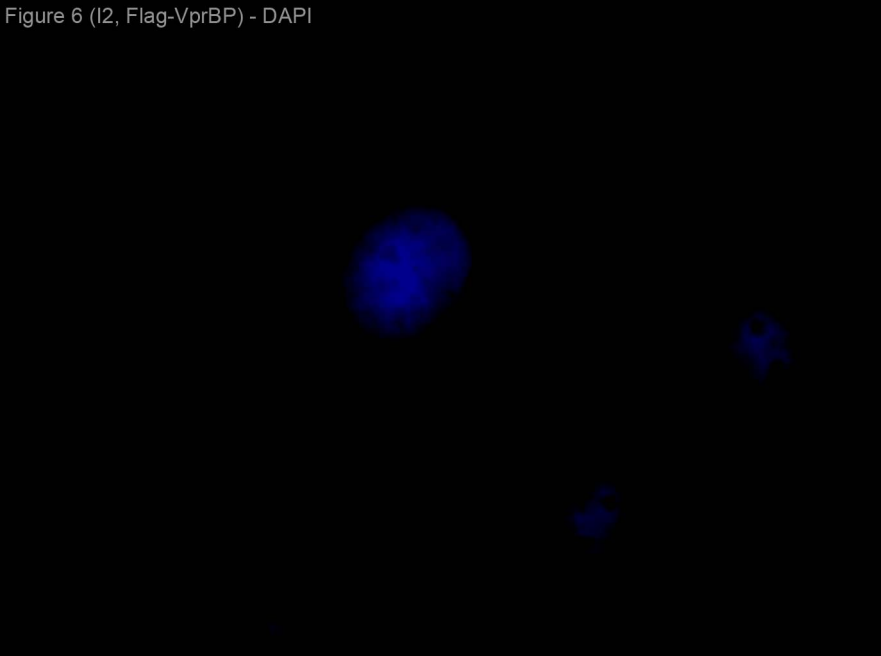

Figure 6 (I2, Flag-VprBP) - Merge

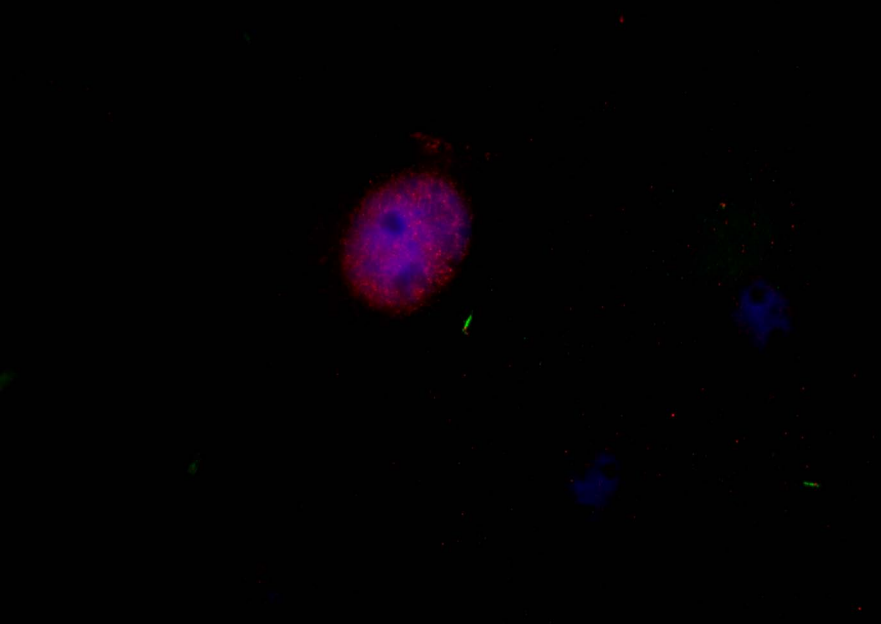



Figure 6 (I3, Flag-EDD) - Flag

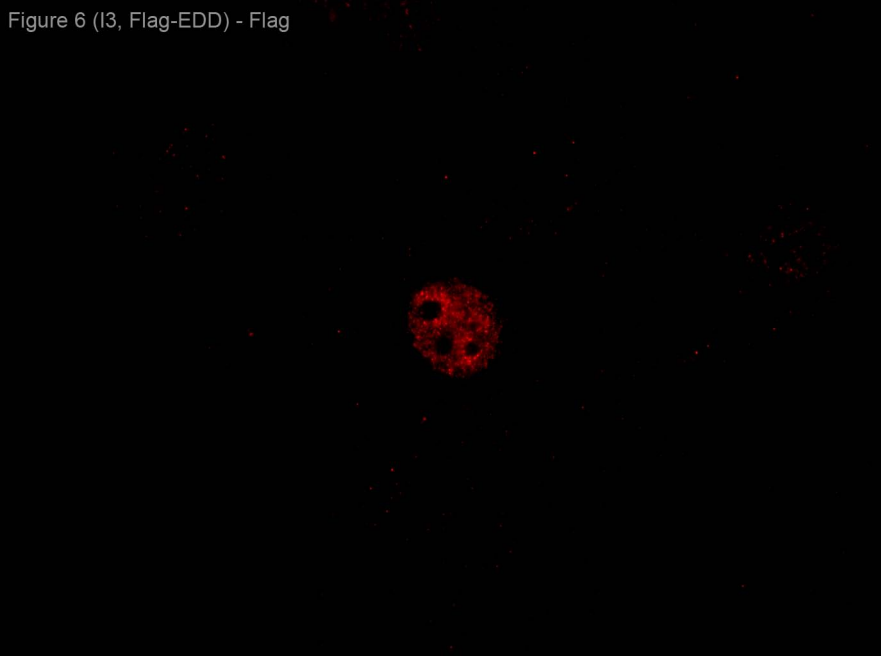

Figure 6 (I3, Flag-EDD) - GT335

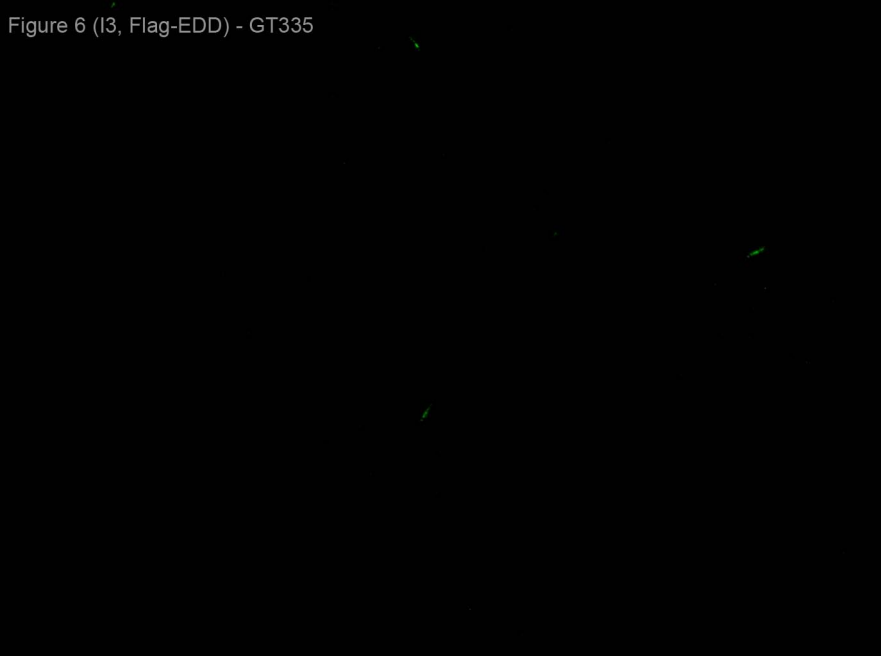

Figure 6 (I3, Flag-EDD) - DAPI

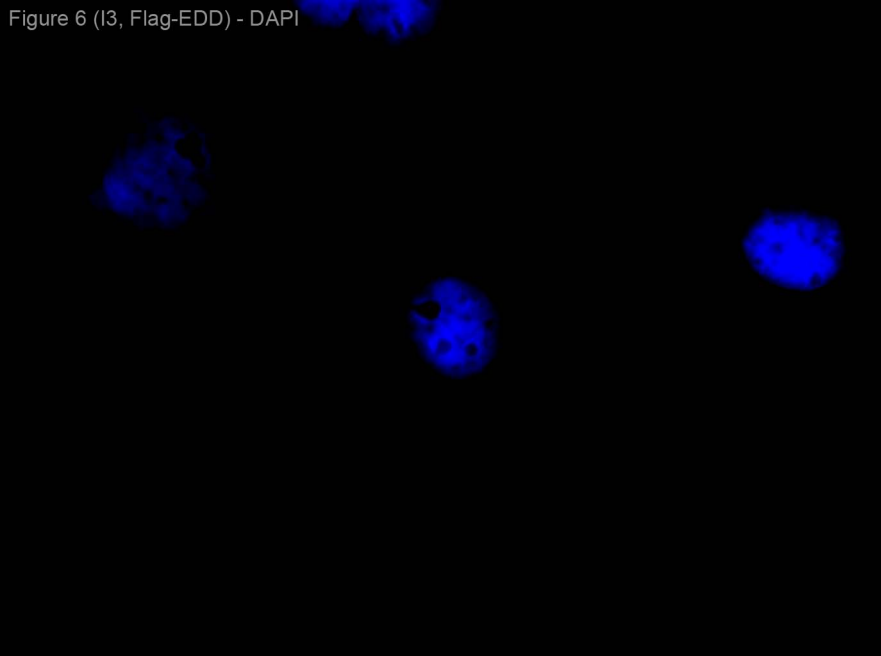

Figure 6 (I3, Flag-EDD) - Merge

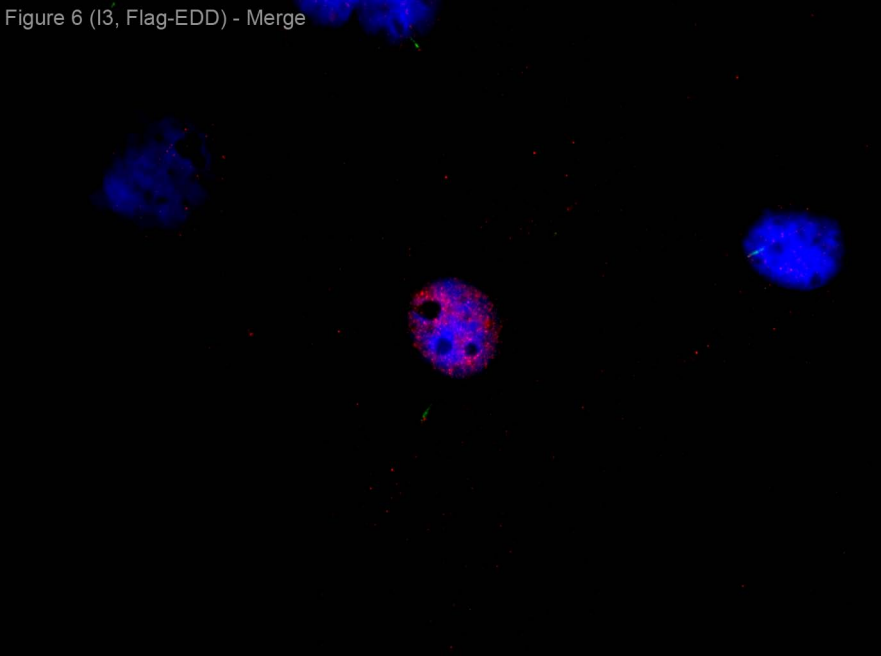

Supplement: EMBR-18-632-s009.pdf [file EMBR-18-632-s009.pdf]
