# Supplementary material
Source: PubMed Central journal article supplement (PMC5376967)
Supplement: EMBR-18-632-s001.pdf [file EMBR-18-632-s001.pdf]

## Appendix

### Table of Contents

---

|                         |      |
|-------------------------|------|
| Appendix Figure S1      | pg 2 |
| Appendix Figure S2      | pg 3 |
| Appendix Figure S3      | pg 4 |
| Appendix Figure S4      | pg 5 |
| Appendix Figure S5      | pg 6 |
| Appendix Figure S6      | pg 7 |
| Appendix Figure Legends | pg 8 |

**A.**

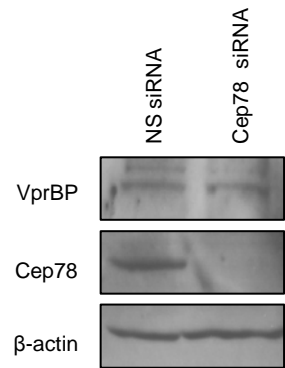

**B.**

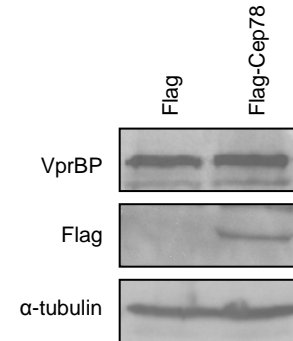

**C.**

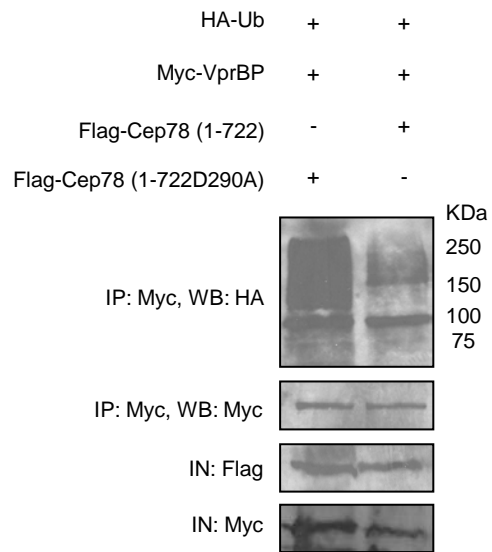

**D.**

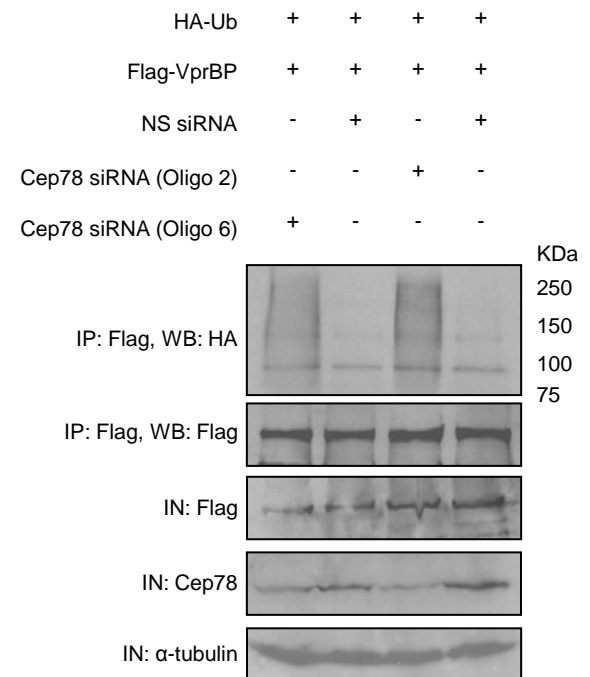

Appendix Figure S2

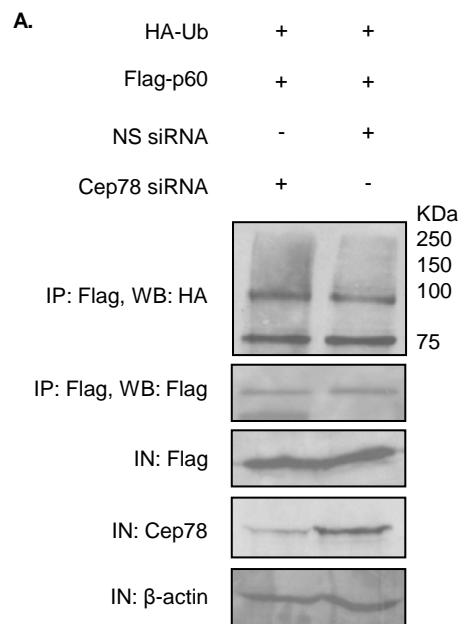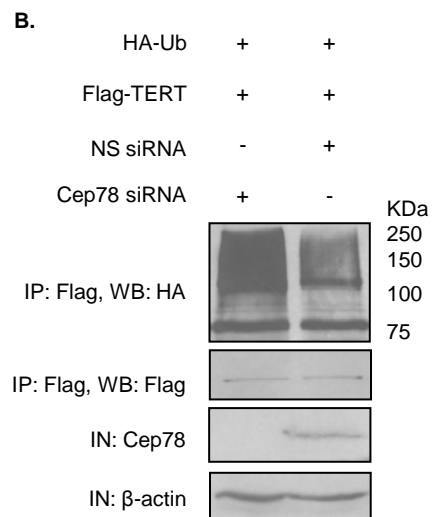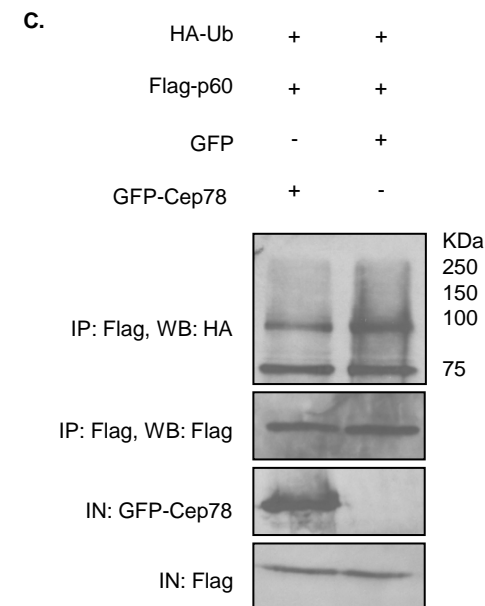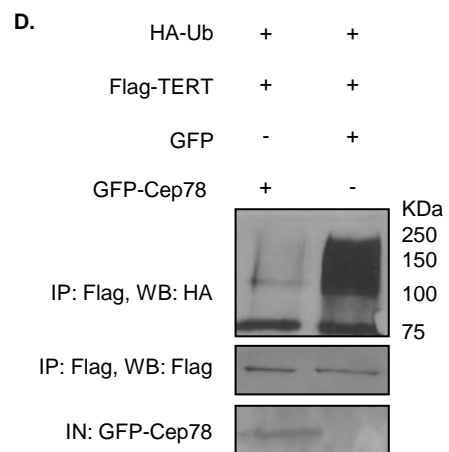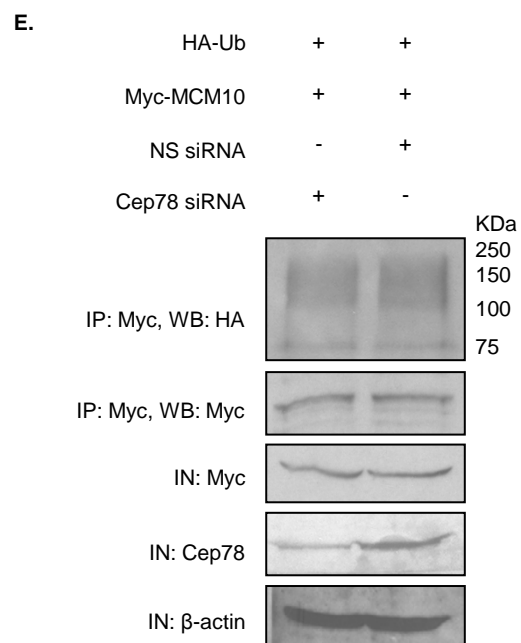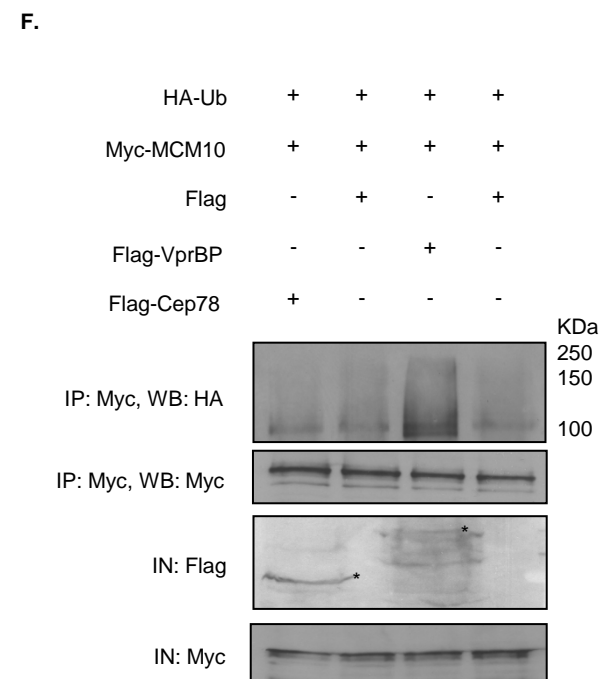

**A.**

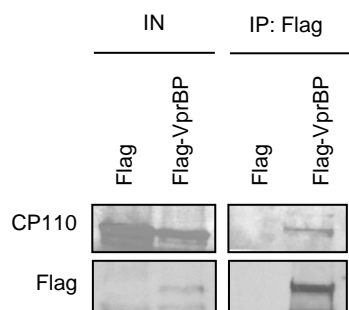

**B.**

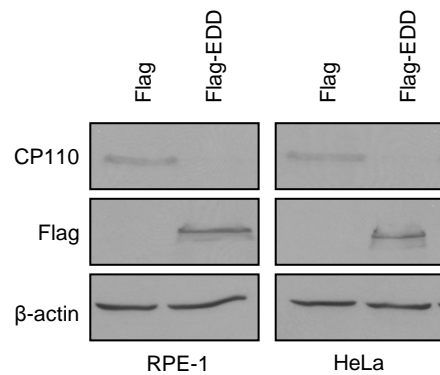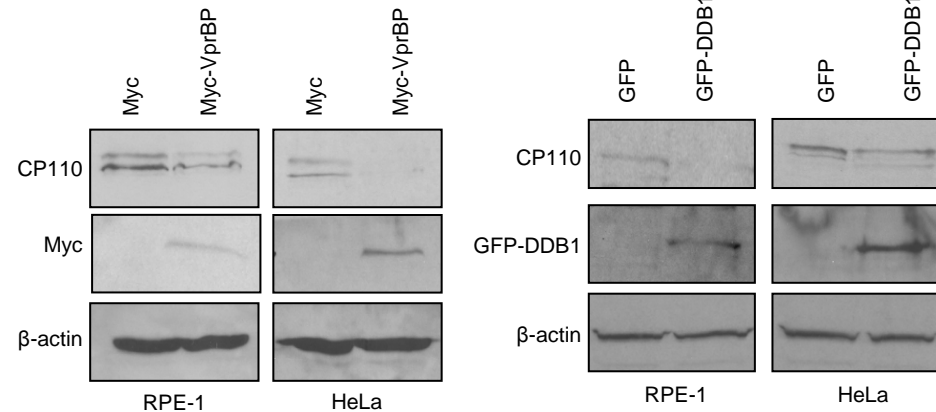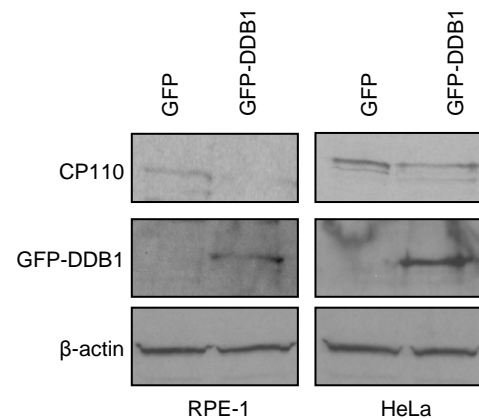

**C.**

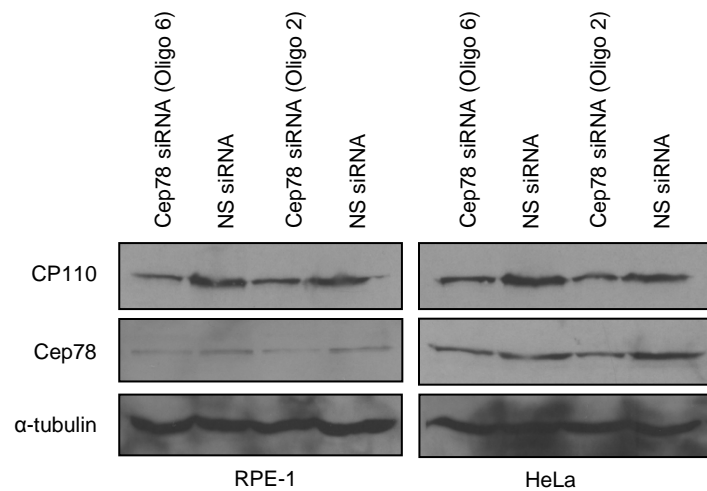

**D.**

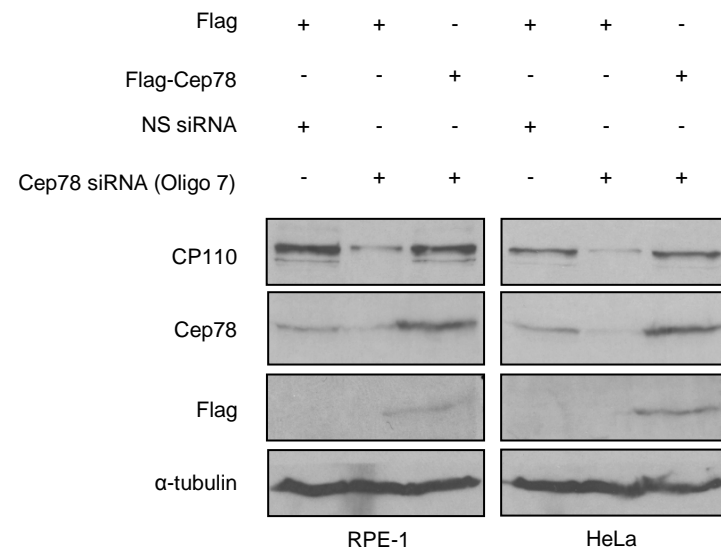

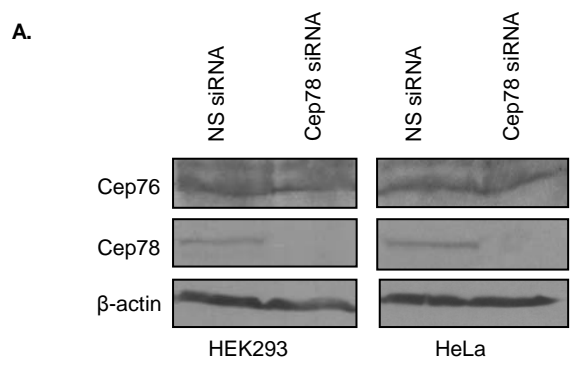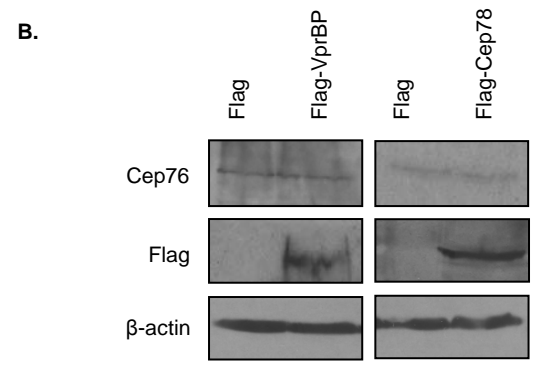

**A.**

|               |   |   |   |   |   |   |   |   |   |
|---------------|---|---|---|---|---|---|---|---|---|
| Flag          | + | - | - | + | - | - | + | - | - |
| Flag-Neur14   | - | - | - | - | + | + | - | - | - |
| Flag-VprBP    | - | - | - | - | - | - | - | + | + |
| Flag-Cyclin F | - | + | + | - | - | - | - | - | - |
| HA-CP110      | + | + | + | + | + | + | + | + | + |
| GFP           | + | + | - | + | + | - | + | + | - |
| GFP-Cep78     | - | - | + | - | - | + | - | - | + |

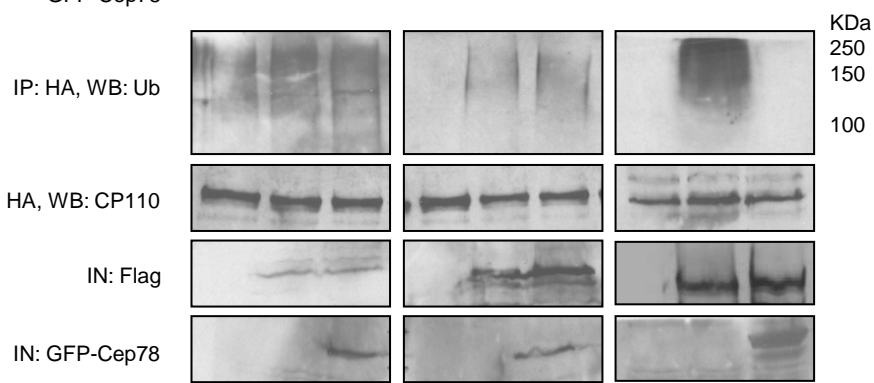

**B.**

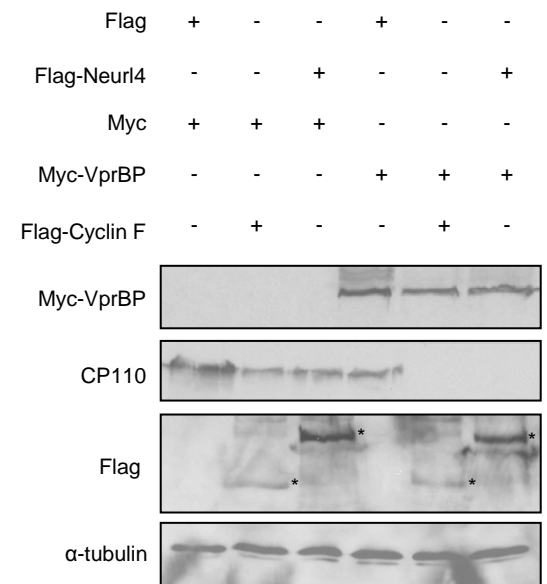

A.

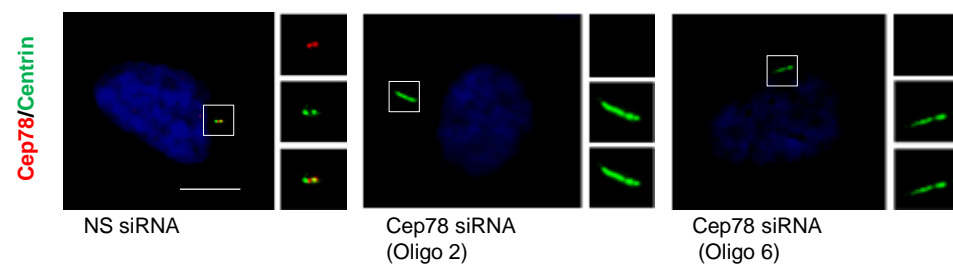

B.

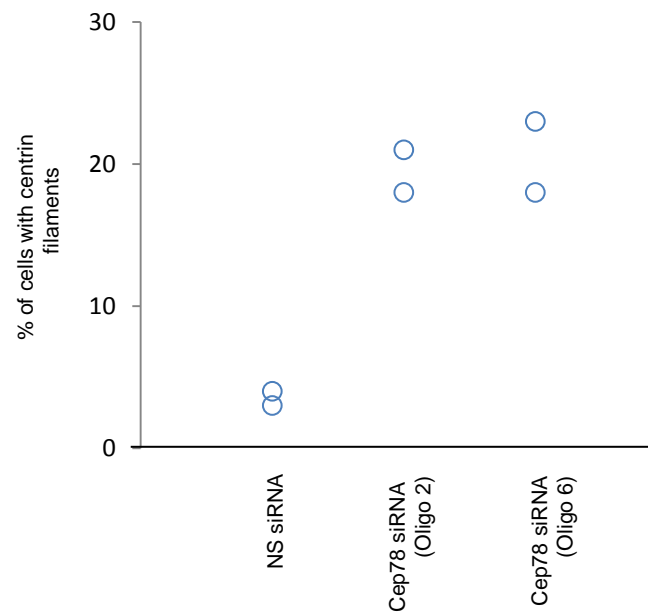

C.

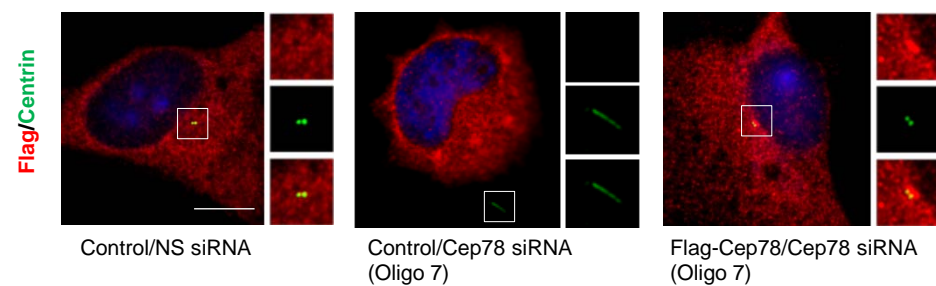

D.

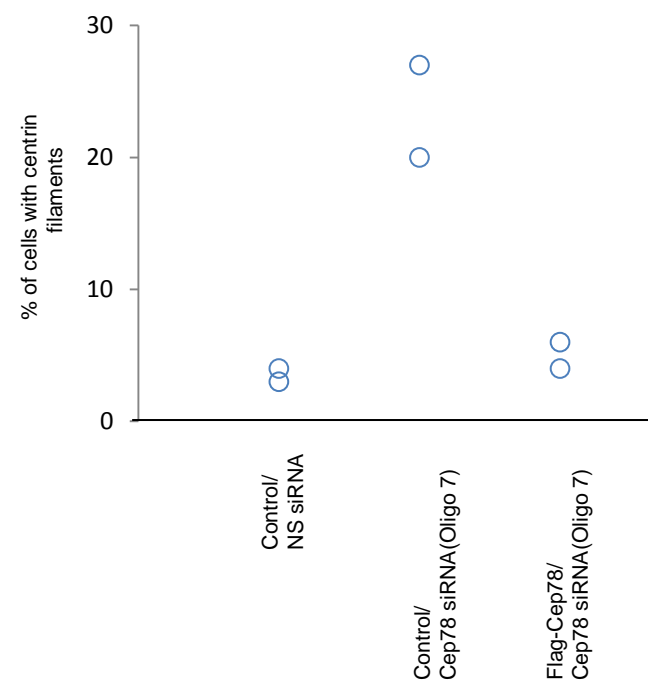

**Appendix Figure S1: Depletion or expression Cep78 had no effect on VprBP protein levels and Cep78 inhibits EDD-DYRK2-DDB1<sup>VprBP</sup>**

(A) HEK293 cells were transfected with NS siRNA or Cep78 siRNA. Lysates were Western blotted with the indicated antibodies.  $\beta$ -actin was used as a loading control. (B) Flag or Flag-Cep78 was expressed in HEK293 cells. Lysates were Western blotted with the indicated antibodies.  $\alpha$ -tubulin was used as a loading control. (C) Flag-Cep78 wild type (1-722) or mutant (1-722D290A) was co-expressed with HA-Ub and Myc-VprBP in HEK293 cells. Lysates were immunoprecipitated with an anti-Myc antibody without SDS and Western blotted with the indicated antibodies. IN, input. (D) HEK293 cells were transfected with NS siRNA or Cep78 siRNA (oligo 2 or oligo 6) and constructs expressing Flag-VprBP and HA-Ub. Lysates were immunoprecipitated with an anti-Flag antibody without SDS and Western blotted with the indicated antibodies. IN, input.  $\alpha$ -tubulin was used as a loading control.

**Appendix Figure S2: Cep78 modulates ubiquitination of two EDD-DYRK2-DDB1<sup>VprBP</sup> substrates katanin p60 and TERT but not a CRL4<sup>VprBP</sup> substrate MCM10**

(A, B) HEK293 cells were transfected with NS siRNA or Cep78 siRNA and constructs expressing HA-Ub and Flag-*katanin p60* or Flag-*TERT*. Lysates were immunoprecipitated with an anti-Flag antibody in 1% SDS and Western blotted with the indicated antibodies. IN, input.  $\beta$ -actin was used as a loading control. (C, D) HEK293 cells were transfected with constructs expressing HA-Ub, Flag-*katanin p60* or Flag-*TERT*, and GFP or GFP-Cep78. Lysates were immunoprecipitated with an anti-Flag antibody in 1% SDS and Western blotted with the indicated antibodies. IN, input. (E) HEK293 cells were transfected with NS siRNA or Cep78 siRNA and constructs expressing HA-Ub and Myc-*MCM10*. Lysates were immunoprecipitated with an anti-Myc antibody in 1% SDS and Western blotted with the indicated antibodies. IN,



input.  $\beta$ -actin was used as a loading control. **(F)** HEK293 cells were transfected with constructs expressing HA-Ub, Myc-MCM10, and Flag, Flag-Cep78 or Flag-VprBP. Lysates were immunoprecipitated with an anti-Myc antibody in 1% SDS and Western blotted with the indicated antibodies. IN, input. \* denotes bands corresponding to the expected proteins.

**Appendix Figure S3: CP110 interacts with VprBP and its protein levels are dependent on EDD-DYRK2-DDB1<sup>VprBP</sup> and Cep78**

**(A)** Flag or Flag-VprBP was expressed in HEK293 cells. Lysates were immunoprecipitated with an anti-Flag antibody and Western blotted with the indicated antibodies. IN, input. **(B)** RPE-1 or HeLa cells were transfected with construct expressing Myc, Myc-VprBP, Flag, Flag-EDD, GFP or GFP-DDB1. Lysates were Western blotted with the indicated antibodies.  $\beta$ -actin was used as a loading control. **(C)** RPE-1 or HeLa cells were transfected with NS siRNA or Cep78 siRNA (oligo 2 or 6).  $\alpha$ -tubulin was used as a loading control. **(D)** RPE-1 or HeLa cells were transfected with NS siRNA or Cep78 siRNA that targets the 3'UTR of Cep78 mRNA (oligo 7) and construct expressing Flag or Flag-Cep78. Lysates were Western blotted with the indicated antibodies.  $\alpha$ -tubulin was used as a loading control.

**Appendix Figure S4: Cep76 protein levels are not affected by EDD-DYRK2-DDB1<sup>VprBP</sup> or Cep78**

**(A)** HEK293 and HeLa cells were transfected with NS siRNA or Cep78 siRNA. Lysates were Western blotted with the indicated antibodies.  $\beta$ -actin was used as a loading control. **(B)** Flag, Flag-Cep78 or Flag-VprBP was expressed in HEK293 cells. Lysates were Western blotted with the indicated antibodies.  $\beta$ -actin was used as a loading control.

**Appendix Figure S5: Cep78 regulates CP110 ubiquitination and protein levels through EDD-DYRK2-DDB1<sup>VprBP</sup>**

(A) HEK293 cells were transfected with constructs expressing Flag-Cyclin F, Flag-Neurl4 or Flag-VprBP, GFP or GFP-Cep78, and HA-CP110. Lysates were immunoprecipitated with an anti-HA antibody in 1% SDS and Western blotted with the indicated antibodies. IN, input. (B) Flag-Cyclin F, Flag-Neurl4 and Myc-VprBP were expressed singly or in combination in HeLa cells. Lysates were Western blotted with the indicated antibodies.  $\alpha$ -tubulin was used as a loading control.\* denotes bands corresponding to the expected proteins.

**Appendix Figure S6: Cep78 controls CP110-dependent centriole elongation in non-ciliated cells**

(A) HeLa cells transfected with NS siRNA and Cep78 siRNA (oligo 2 or oligo 6) were stained with DAPI (blue) and antibodies against Cep78 (red) and centrin (green). Scale bar, 1  $\mu$ m. (C) HeLa cells were transfected with NS siRNA or Cep78 siRNA that targets the 3'UTR of Cep78 mRNA (oligo 7) and construct expressing an irrelevant Flag-tagged protein (control) or Flag-Cep78. Cells were stained with DAPI (blue) and antibodies against Flag (red) and centrin (green). Scale bar, 1  $\mu$ m. (B and D) The percentage of cells with elongated centrioles (centrin filaments) was determined. At least 100 cells were scored in each condition and two independent experiments were performed.
