# Supplementary material
Source: PubMed Central journal article supplement (PMC5376967)
Supplement: EMBR-18-632-s002.pdf [file EMBR-18-632-s002.pdf]

## Expanded View Figures

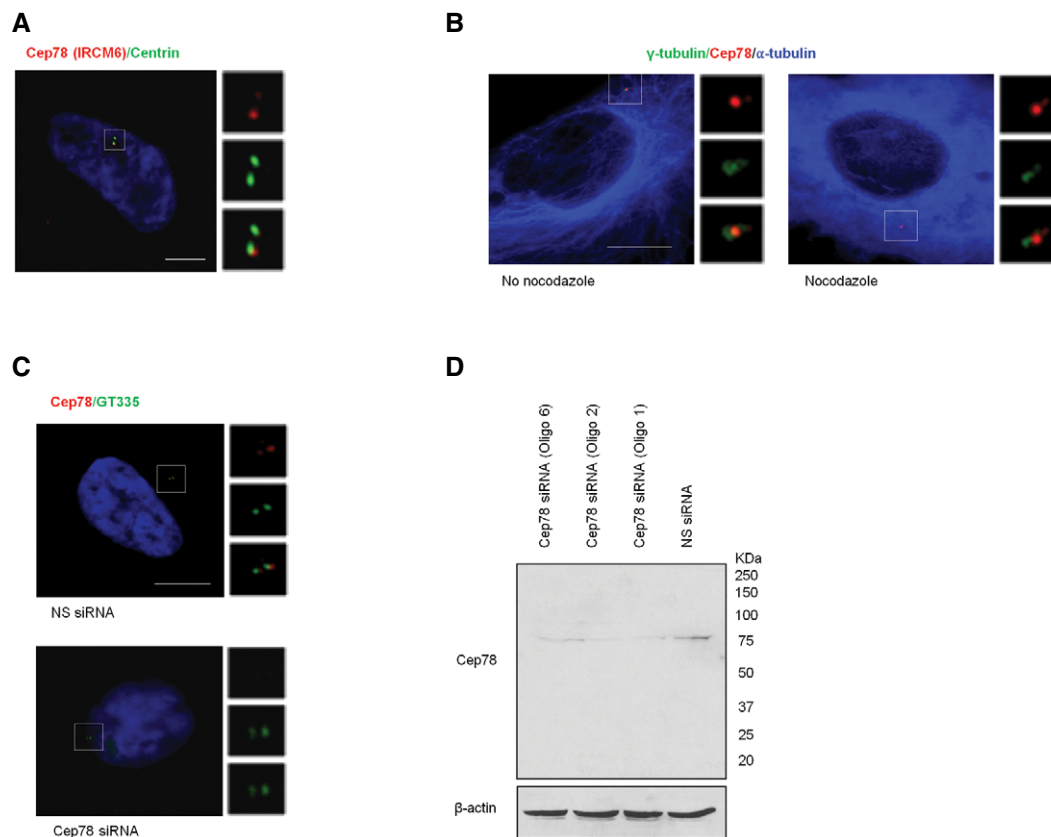**Figure EV1. Characterization of Cep78.**

- A RPE-1 cells were stained with DAPI (blue) and antibodies against centrin (green) and Cep78 raised against the C-terminal region of the protein (IRCM6, red). Scale bar, 1  $\mu$ m.
- B RPE-1 cells untreated or treated with 10  $\mu$ M nocodazole for 1 h to induce microtubule depolymerization were stained with antibodies against  $\gamma$ -tubulin (green),  $\alpha$ -tubulin (blue), and Cep78 (red). Scale bar, 1  $\mu$ m.
- C RPE-1 cells transfected with NS siRNA or Cep78 siRNA were stained with DAPI (blue) and antibodies against Cep78 (red) and polyglutamylated tubulin (GT335, green). Scale bar, 1  $\mu$ m.
- D RPE-1 cells were transfected with NS siRNA or Cep78 siRNA (oligo 1, 2 or 6). Lysates were Western blotted with antibody against Cep78.  $\beta$ -actin was used as a loading control.

Source data are available online for this figure.

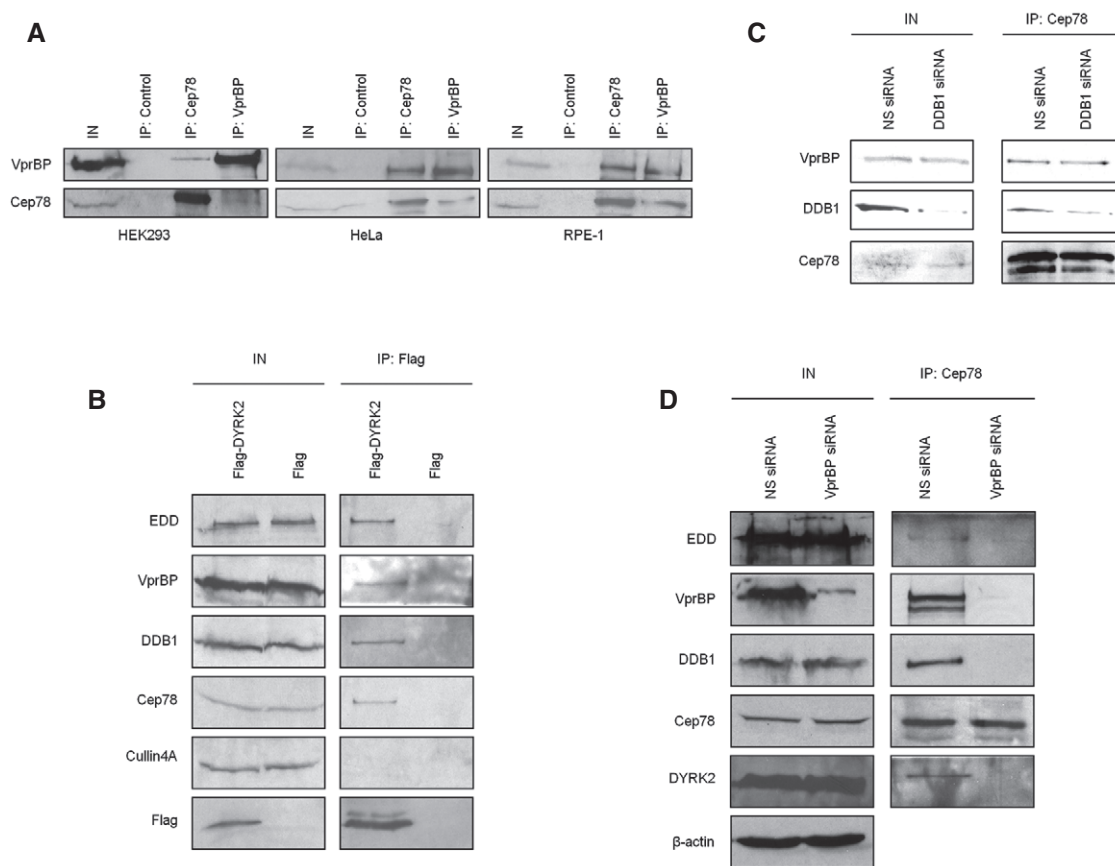

**Figure EV2. Cep78 binds to EDD-DYRK2-DDB1<sup>VprBP</sup> through VprBP.**

- A HEK293, HeLa, or RPE-1 lysates were immunoprecipitated with an anti-Flag (control), anti-Cep78 or anti-VprBP antibody, and Western blotted with the indicated antibodies. IN, input.
- B Flag or Flag-DYRK2 was expressed in HEK293 cells. Lysates were immunoprecipitated with an anti-Flag antibody and Western blotted with the indicated antibodies. IN, input.
- C, D HEK293 cells were transfected with NS, DDB1, or VprBP siRNA. Lysates were immunoprecipitated with an anti-Cep78 antibody and Western blotted with the indicated antibodies. IN, input.  $\beta$ -actin was used as a loading control.

Source data are available online for this figure.

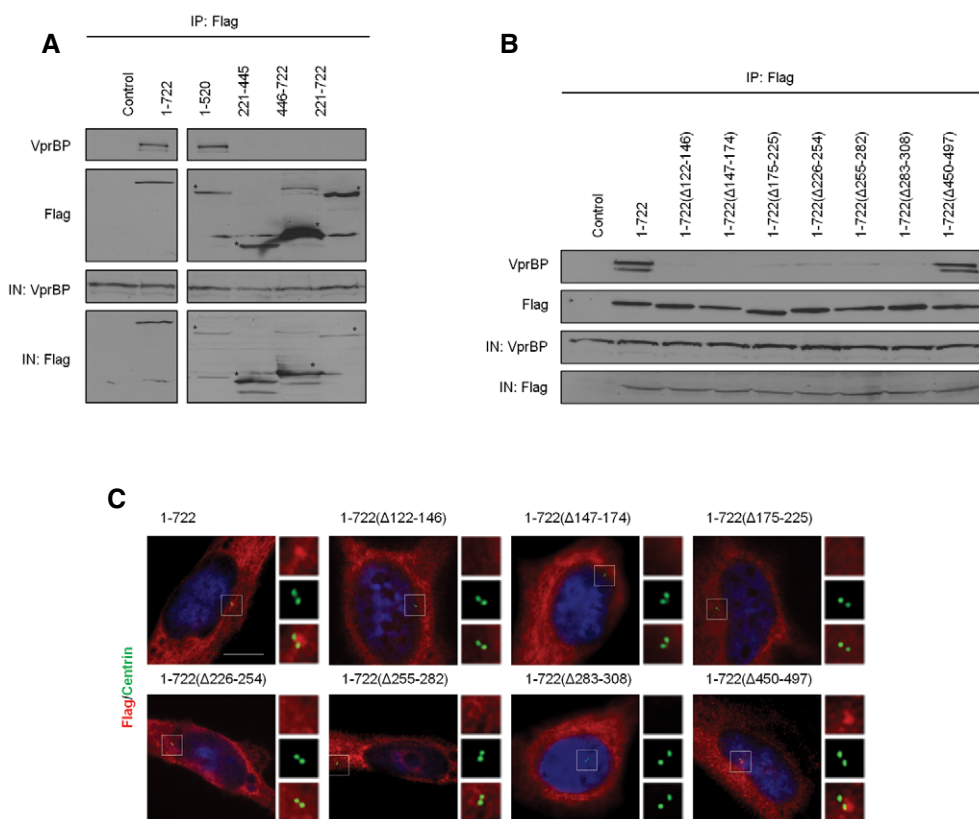

**Figure EV3. Mapping of the centrosomal localization and VprBP-binding domains of Cep78.**

A, B Flag (control), Flag-Cep78 full-length (1–722), or Flag-Cep78 truncated/deletion mutants were expressed in HEK293 cells. Lysates were immunoprecipitated with an anti-Flag antibody and Western blotted with the indicated antibodies. IN, input. \*denotes bands corresponding to the expected proteins.

C RPE-1 cells expressing Flag-Cep78 full-length or truncated/deletion mutants were stained with DAPI (blue) and antibodies against Flag (red) and centrin (green). Scale bar, 1  $\mu$ m.

Source data are available online for this figure.

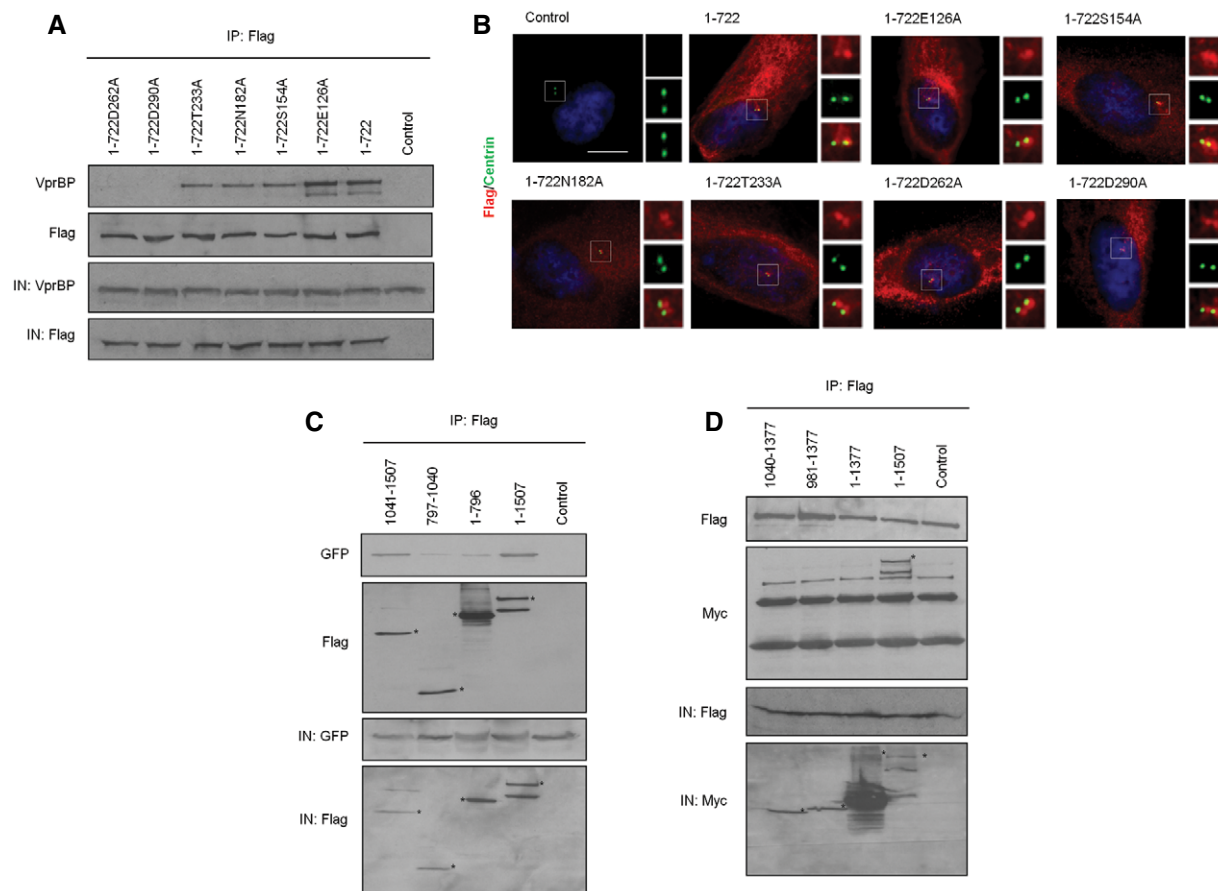

**Figure EV4. Mapping of interaction domains of Cep78 and EDD-DYRK2-DDB1<sup>VprBP</sup>.**

A Flag (control), Flag-Cep78 full-length (1–722), or Flag-Cep78 point mutants were expressed in HEK293 cells. Lysates were immunoprecipitated with an anti-Flag antibody and Western blotted with the indicated antibodies. IN, input.

B RPE-1 cells expressing Flag (control), Flag-Cep78 full-length, or point mutants were stained with DAPI (blue) and antibodies against Flag (red) and centrin (green). Scale bar, 1  $\mu$ m.

C Flag (control), Flag-VprBP full-length (1–1,507), or Flag-VprBP truncated mutants were co-expressed with GFP-Cep78 in HEK293 cells. Lysates were immunoprecipitated with an anti-Flag antibody and Western blotted with the indicated antibodies. IN, input.

D Myc, Myc-VprBP full-length, or Myc-VprBP truncated mutants were co-expressed with Flag-Cep78 in HEK293 cells. Lysates were immunoprecipitated with an anti-Flag antibody and Western blotted with the indicated antibodies. IN, input. \*denotes bands corresponding to the expected proteins.

Source data are available online for this figure.

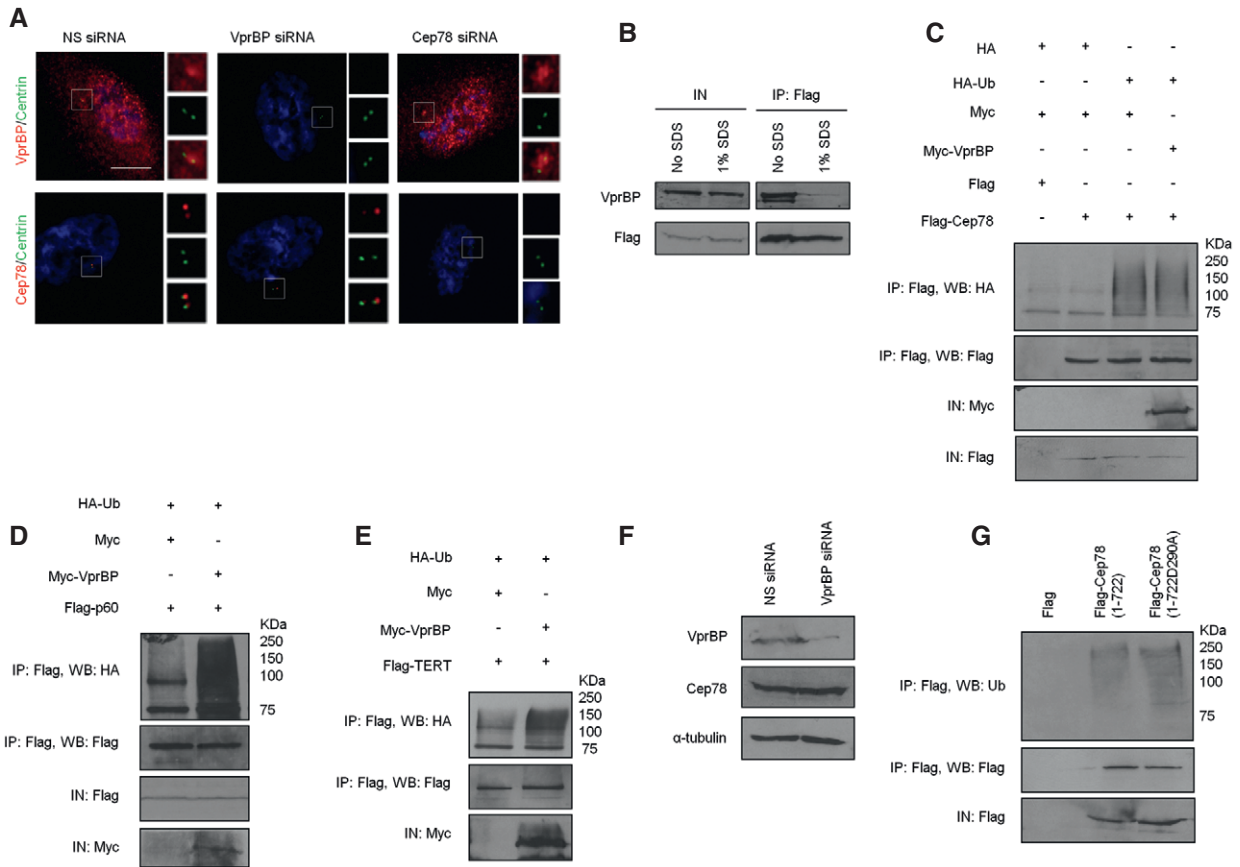

**Figure EV5. Cep78 and VprBP are independently recruited to the centrosome and Cep78 is not an EDD-DYRK2-DDB1<sup>VprBP</sup> substrate.**

- A RPE-1 cells transfected with NS siRNA, Cep78 siRNA, or VprBP siRNA were stained with DAPI (blue) and antibodies against centrin (green) and Cep78 or VprBP (red). Scale bar, 1  $\mu$ m.
- B Flag-Cep78 was expressed in HEK293 cells. Lysates were immunoprecipitated with an anti-Flag antibody in the presence or absence of 1% SDS and Western blotted with the indicated antibodies. IN, input.
- C HEK293 cells expressing Flag or Flag-Cep78, HA or HA-Ub, and Myc or Myc-VprBP were synchronized in mitosis with nocodazole. Lysates were immunoprecipitated with an anti-Flag antibody in 1% SDS and Western blotted with the indicated antibodies. IN, input.
- D, E HA-Ub, Flag-katanin p60 or Flag-TERT, and Myc or Myc-VprBP were co-expressed in HEK293 cells. Lysates were immunoprecipitated with an anti-Flag antibody in 1% SDS and Western blotted with the indicated antibodies. IN, input.
- F HEK293 cells transfected with NS siRNA or VprBP siRNA were synchronized in mitosis. Lysates were Western blotted with the indicated antibodies.  $\alpha$ -tubulin was used as a loading control.
- G HEK293 cells expressing Flag, Flag-Cep78 wild type (1-722), or mutant (1-722D290A) were synchronized in mitosis. Lysates were immunoprecipitated with an anti-Flag antibody in 1% SDS and Western blotted with the indicated antibodies. IN, input.

Source data are available online for this figure.
