# Supplementary material
Source: PubMed Central journal article supplement (PMC5376967)
Supplement: EMBR-18-632-s004.pdf [file EMBR-18-632-s004.pdf]

Figure 1 (A)

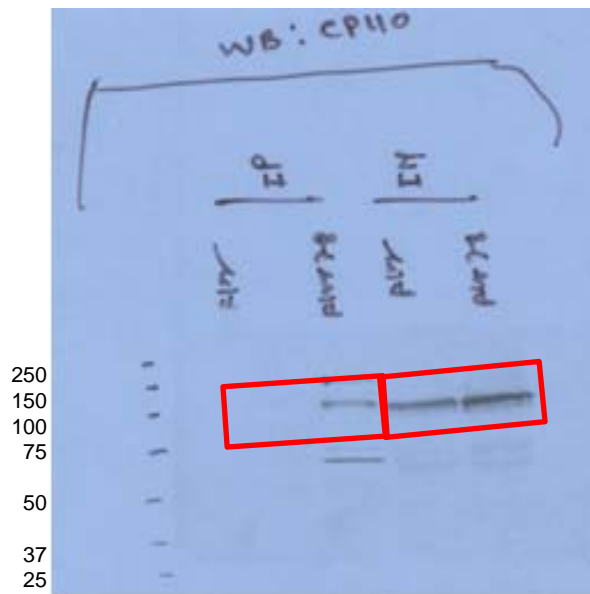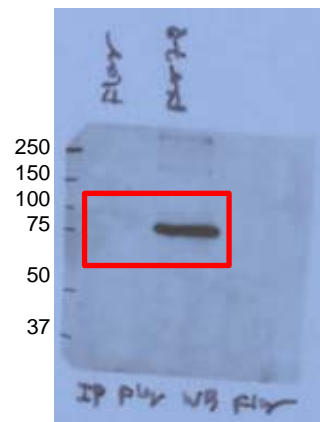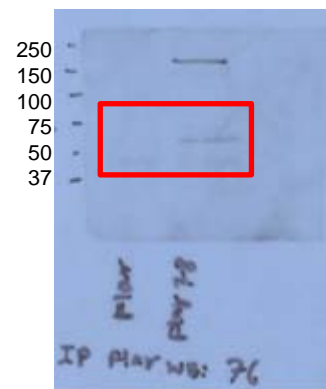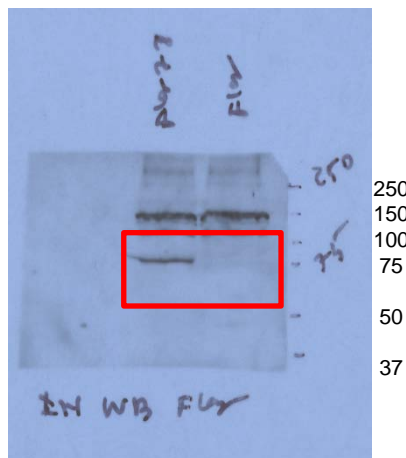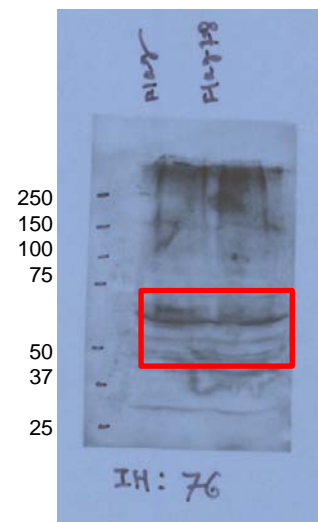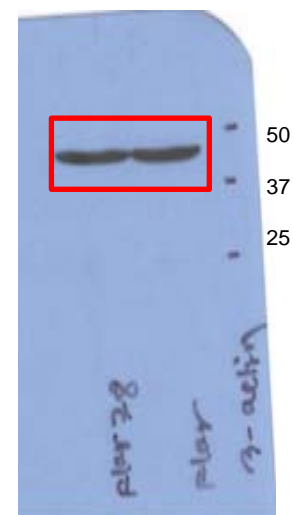

IN:  $\beta$ -actin

Figure 1(B) - CP110

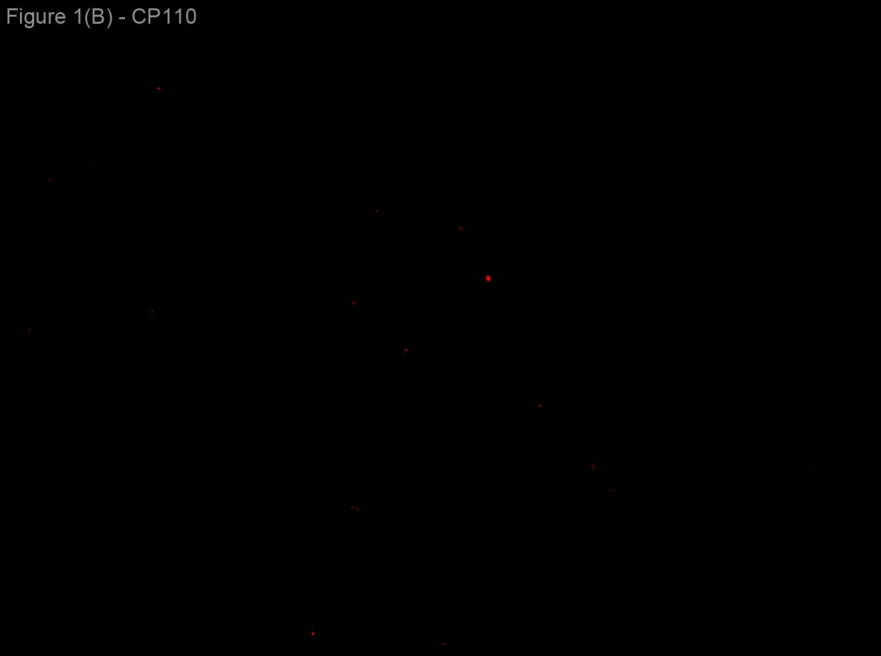

Figure 1(B) - Flag-Cep78

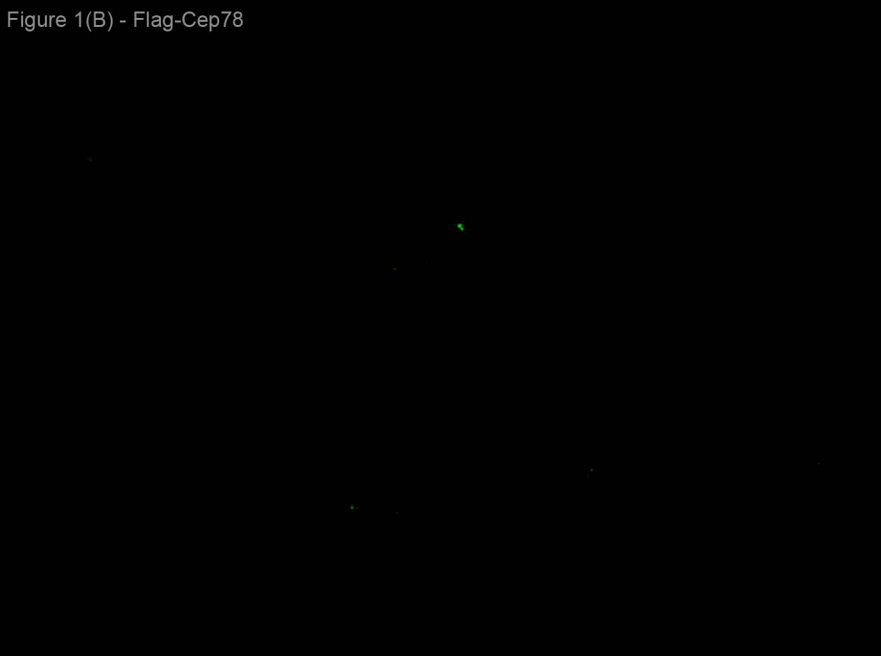

Figure 1(B) - C-Nap1

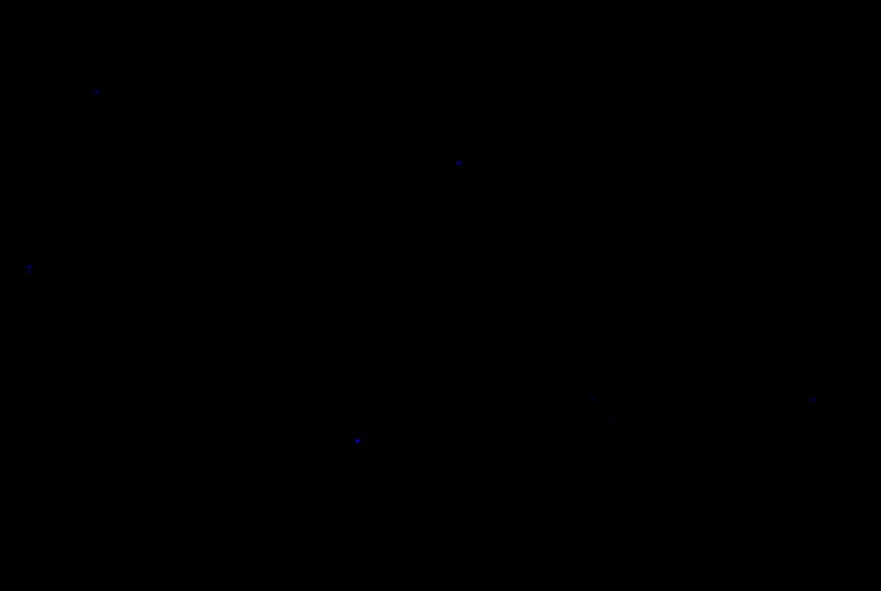

Figure 1(B) - Merge

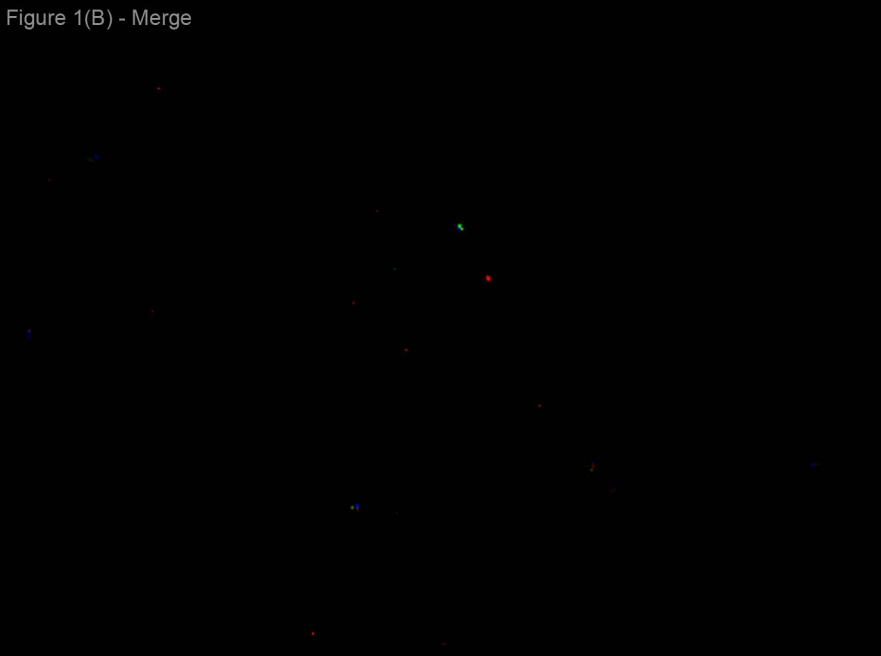

Figure 1(C1) - Cep78

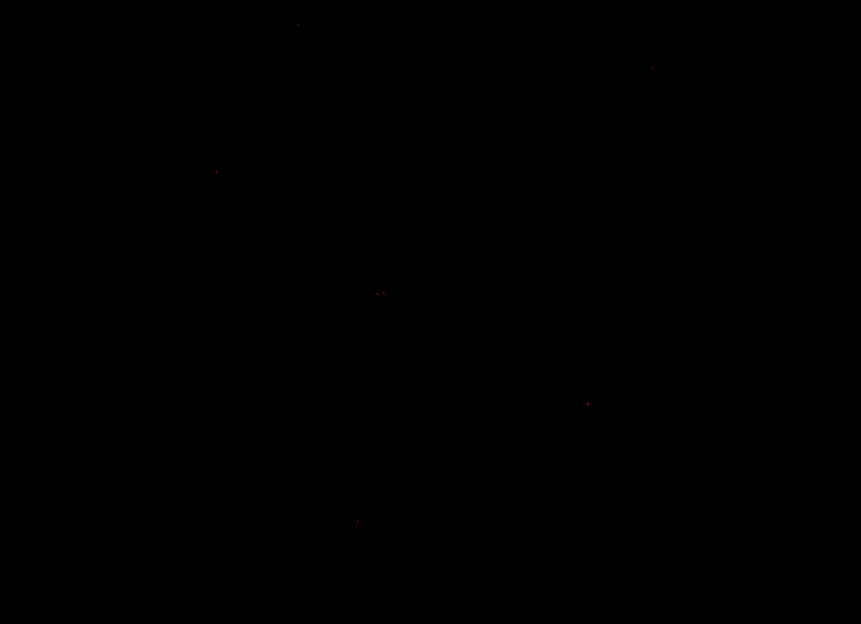

Figure 1(C1) - Centrin

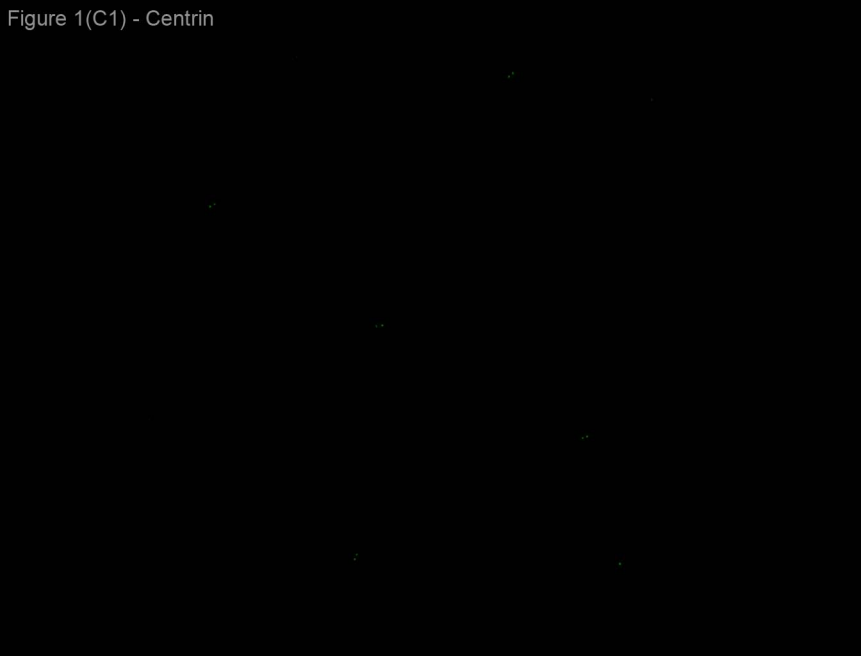

Figure 1(C1) - DAPI

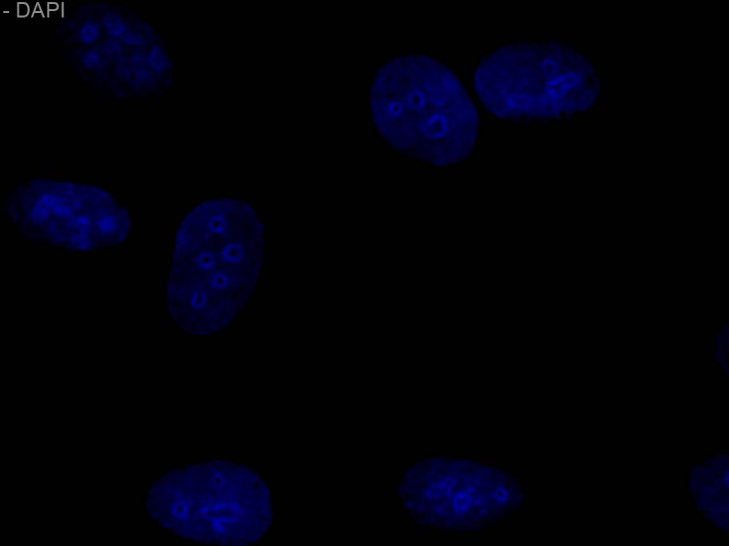



Figure 1(C1) - Merge

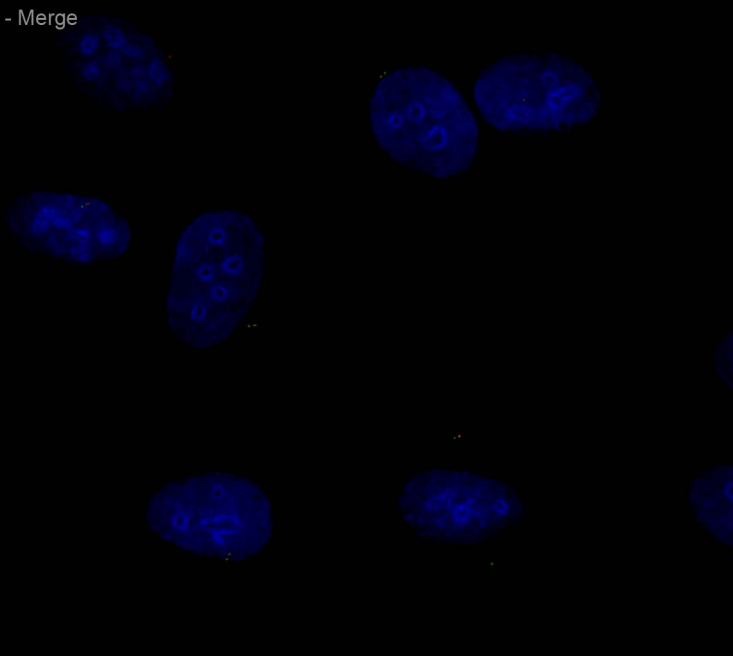

Figure 1(C2) - Cep78

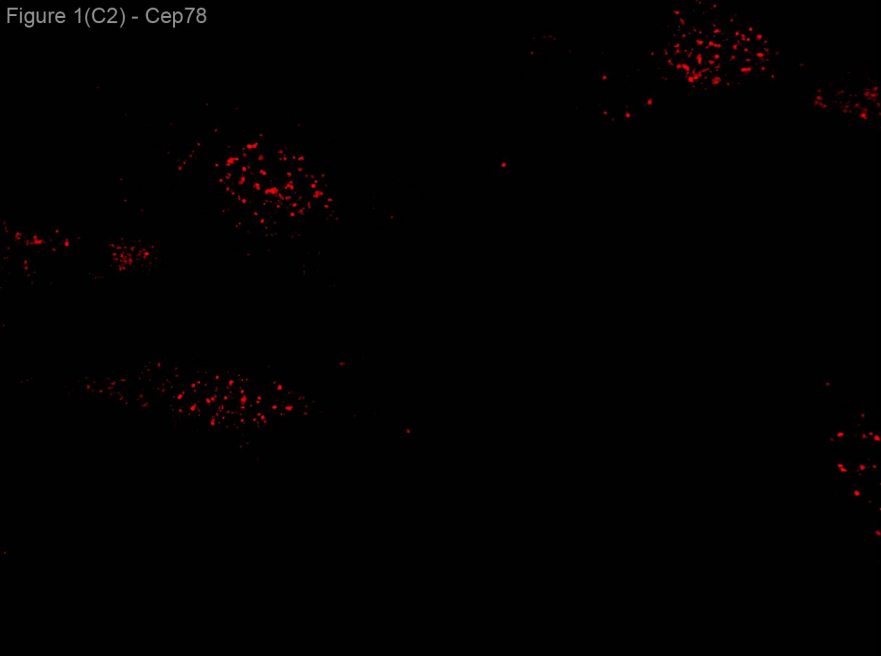

Figure 1(C2) - GT335

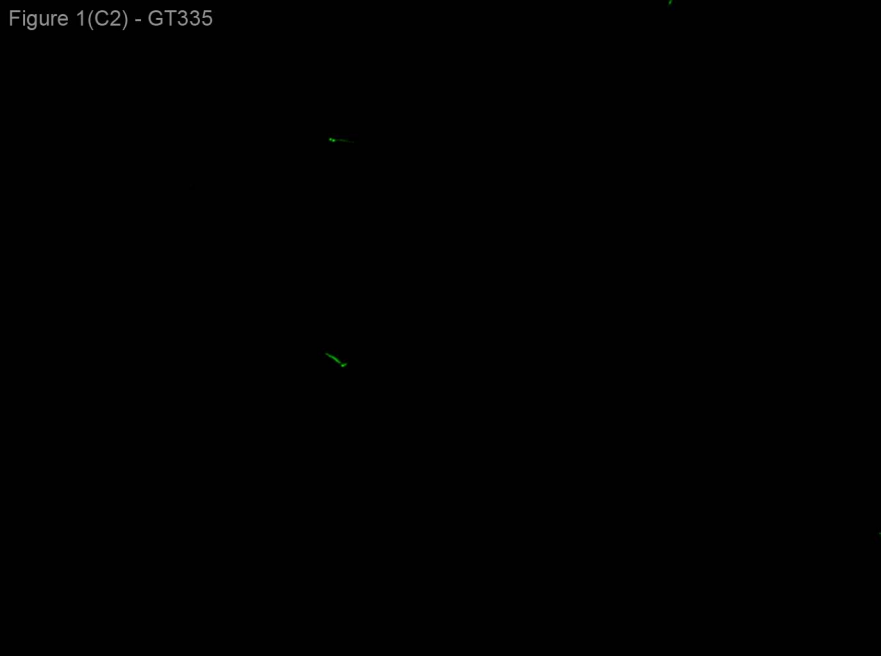

Figure 1(C2) - DAPI

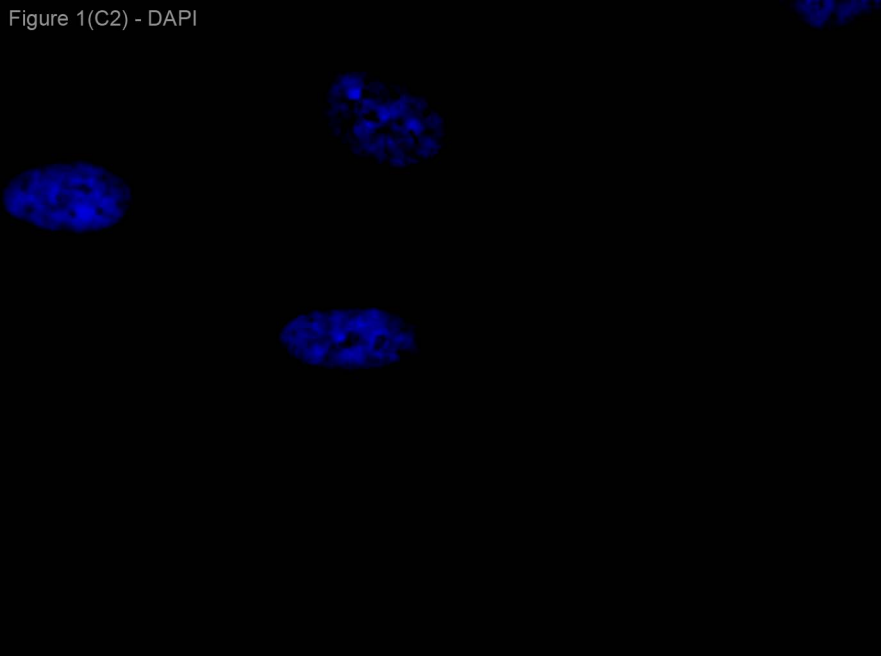

Figure 1(C2) - Merge

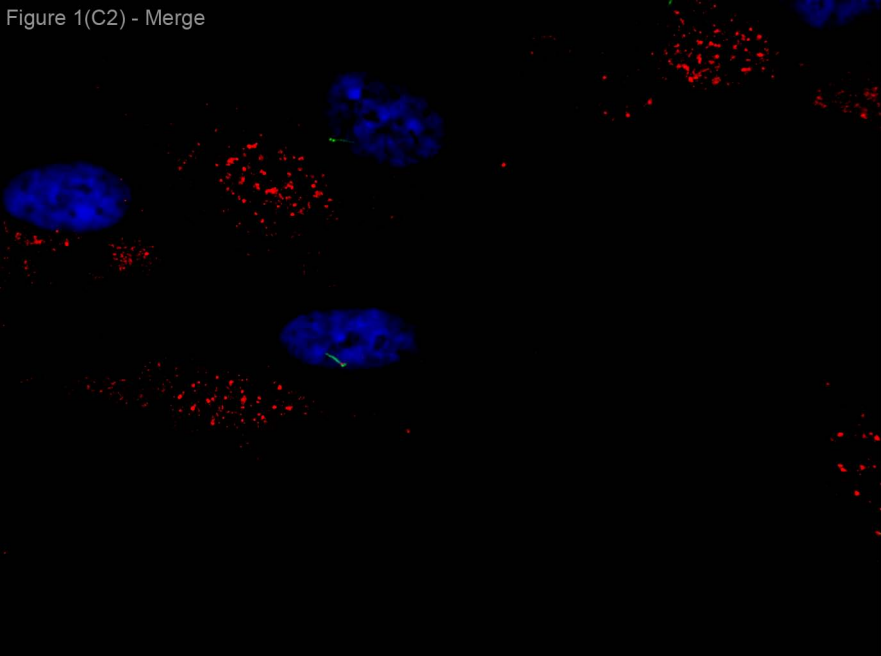

Figure 1(C3) - Cep78

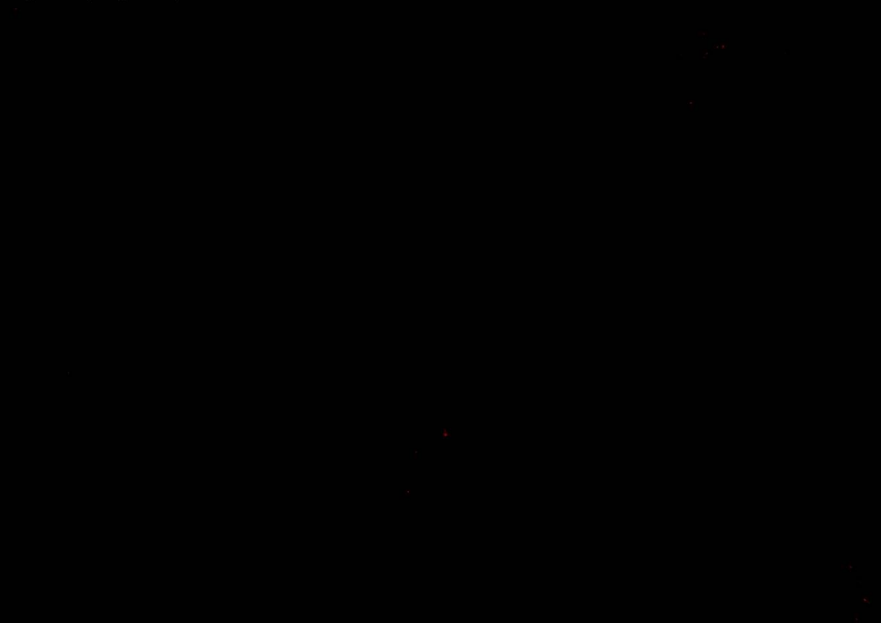

Figure 1(C3) - C-Nap1

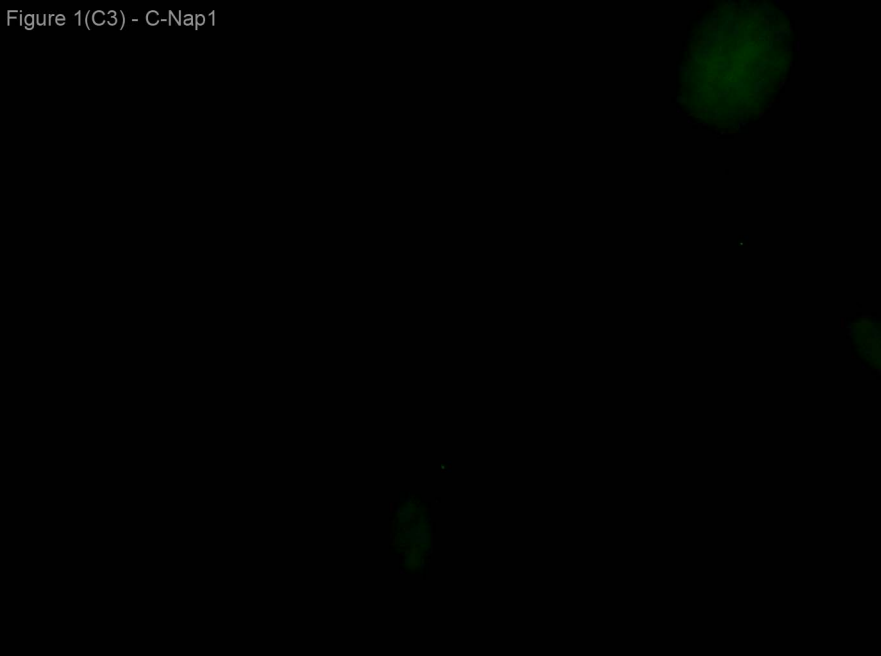

Figure 1(C3) - DAPI

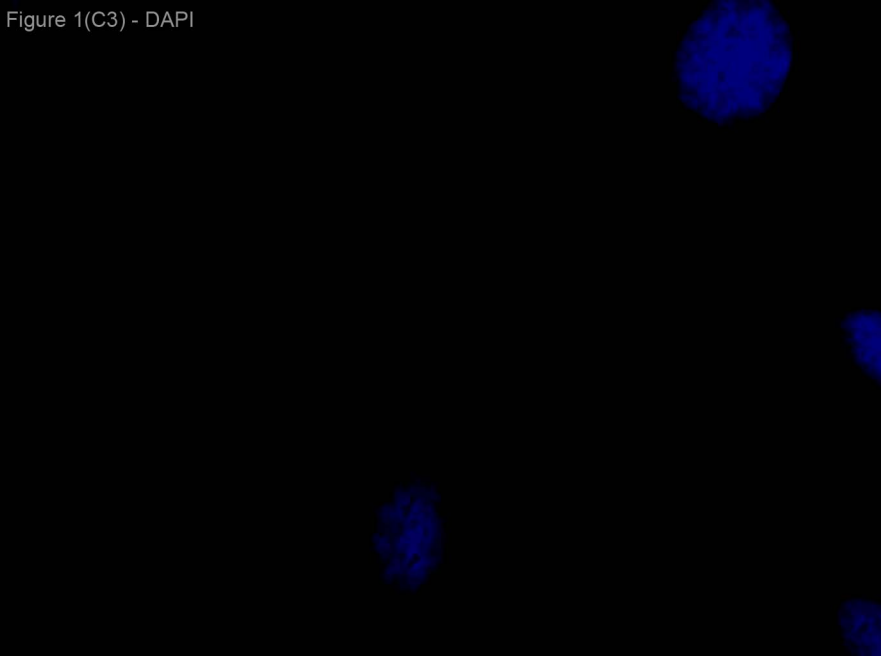



Figure 1(C3) - Merge

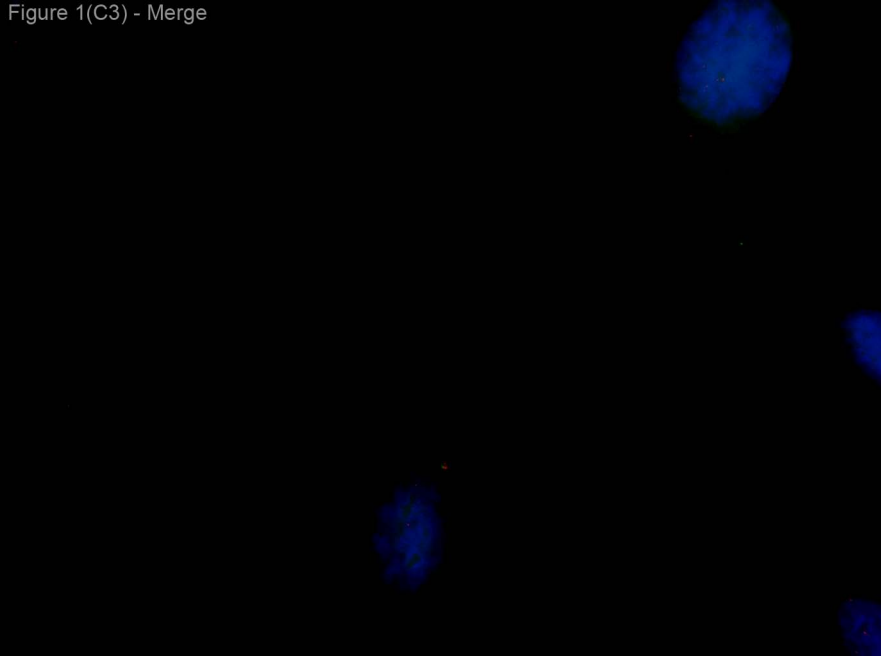

Figure 1(D1, G0) - Cep78

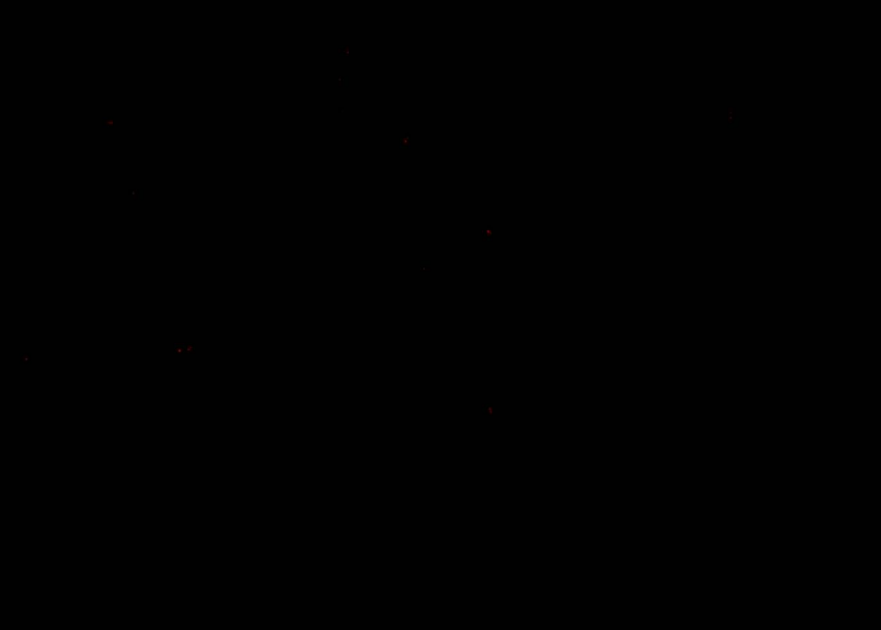

Figure 1(D1, G0) - Centrin

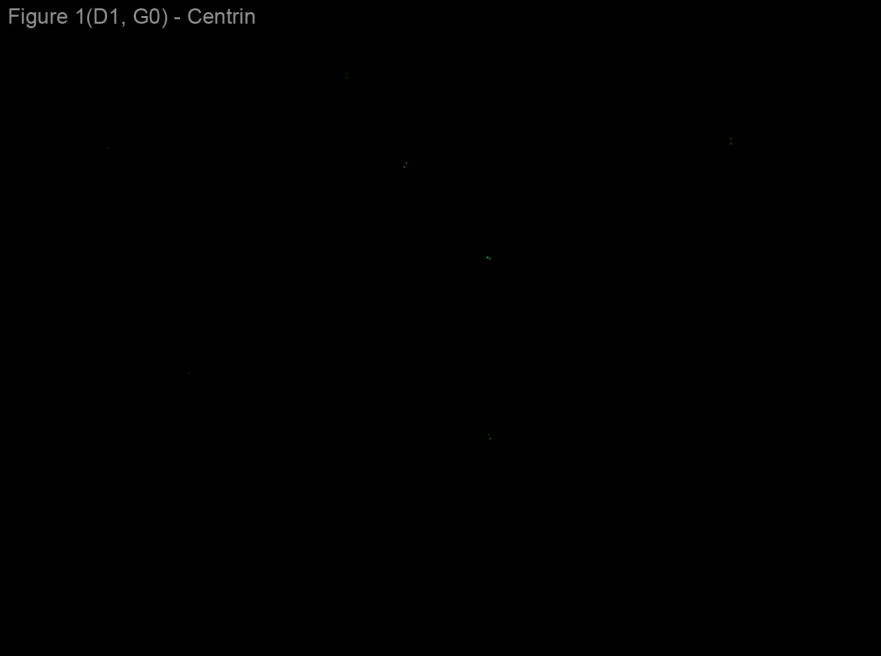

Figure 1(D1, G0) - DAPI

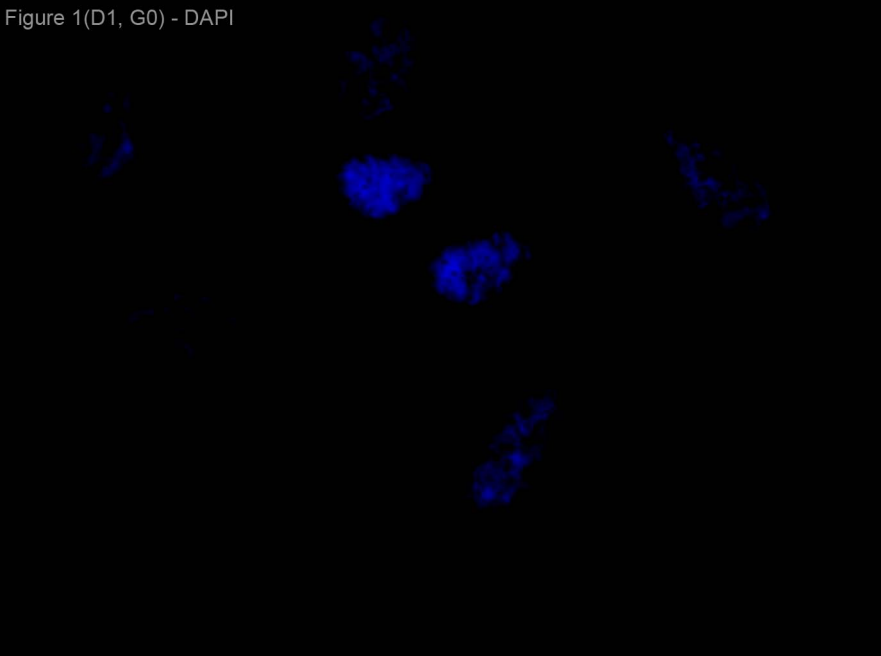

Figure 1(D1, G0) - Merge

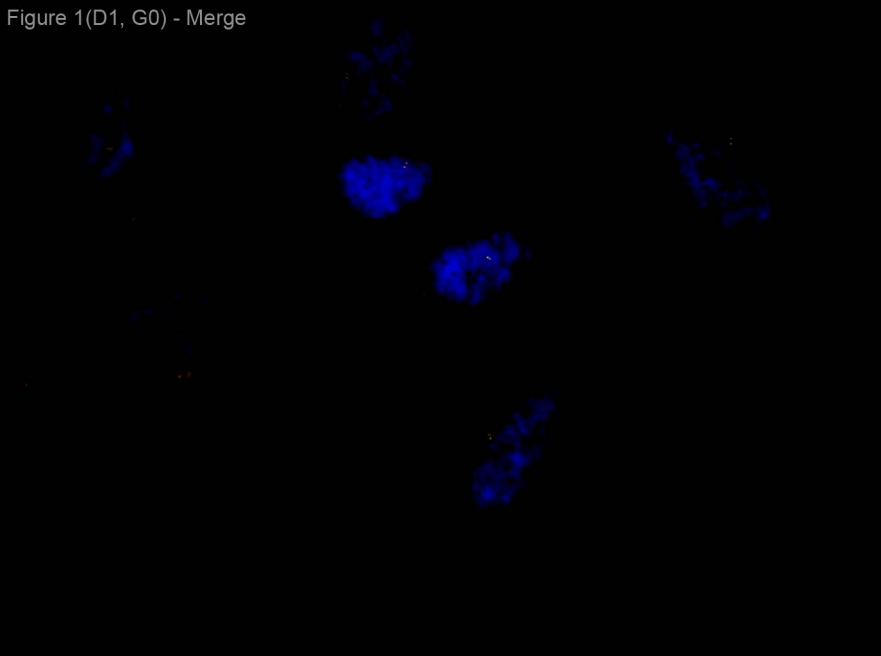

Figure 1(D2, G1) - Cep78

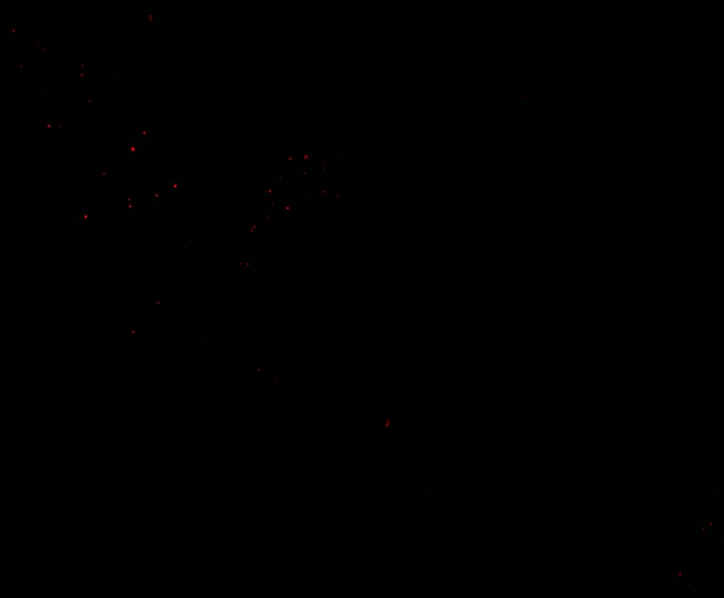

Figure 1(D2, G1) - Centrin

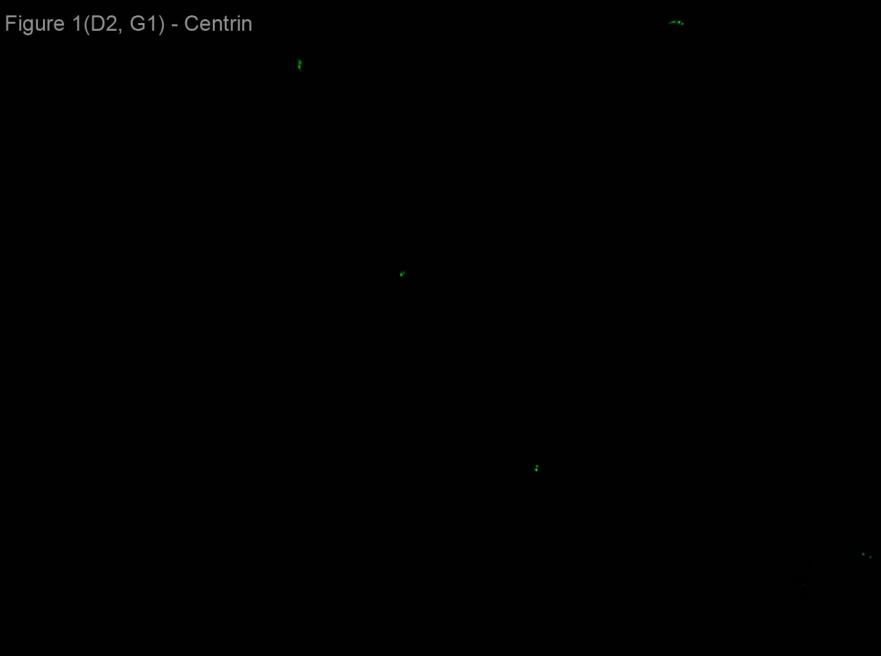

Figure 1(D2, G1) - DAPI

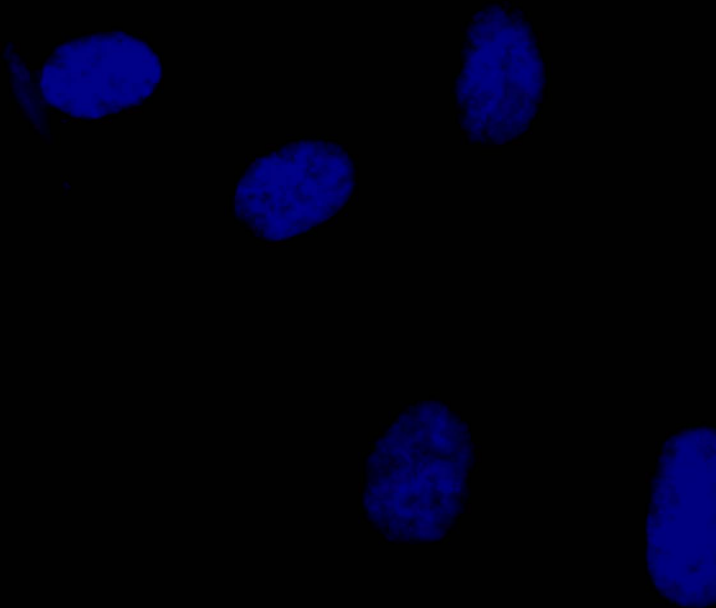



Figure 1(D2, G1) - Merge

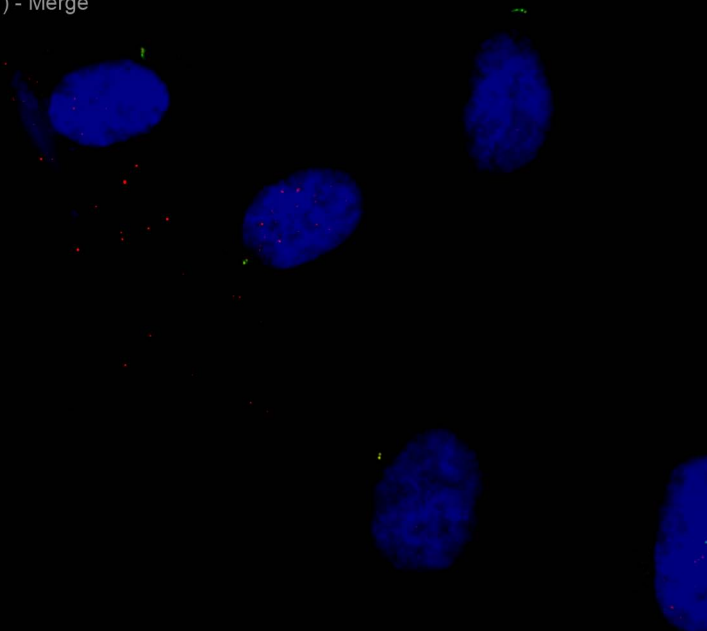

Figure 1(D3, S-Phase) - Cep78

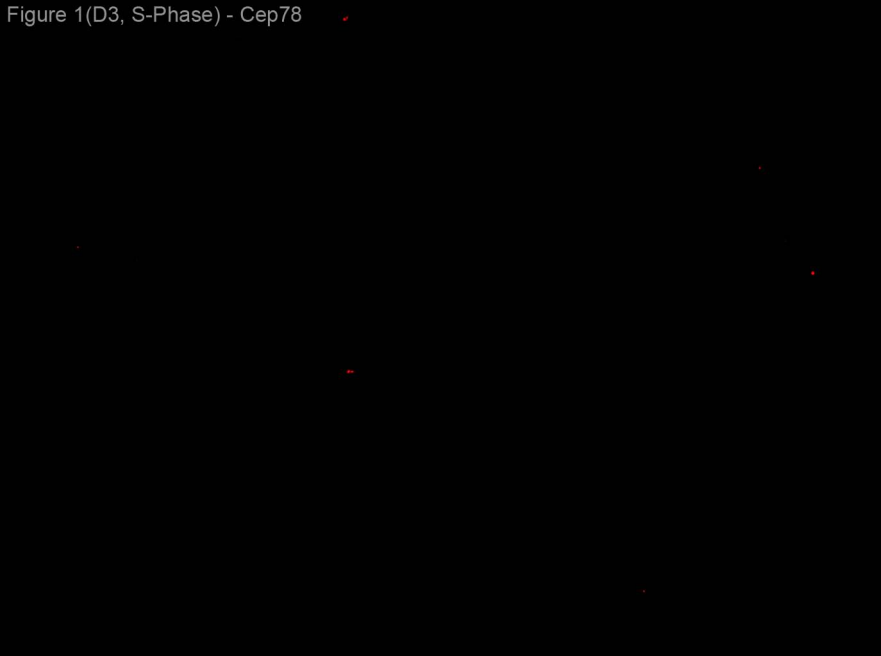

Figure 1(D3, S-Phase) - Centrin

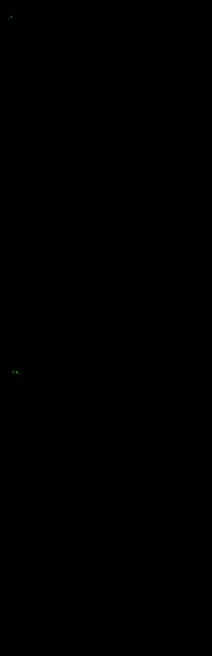

Figure 1(D3, S-Phase) - DAPI

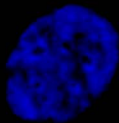

Figure 1(D3, S-Phase) - Merge

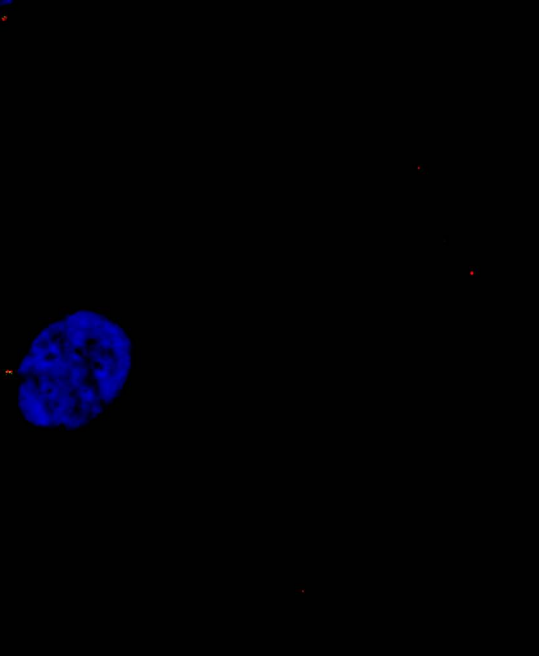

Figure 1(D4, G2) - Cep78

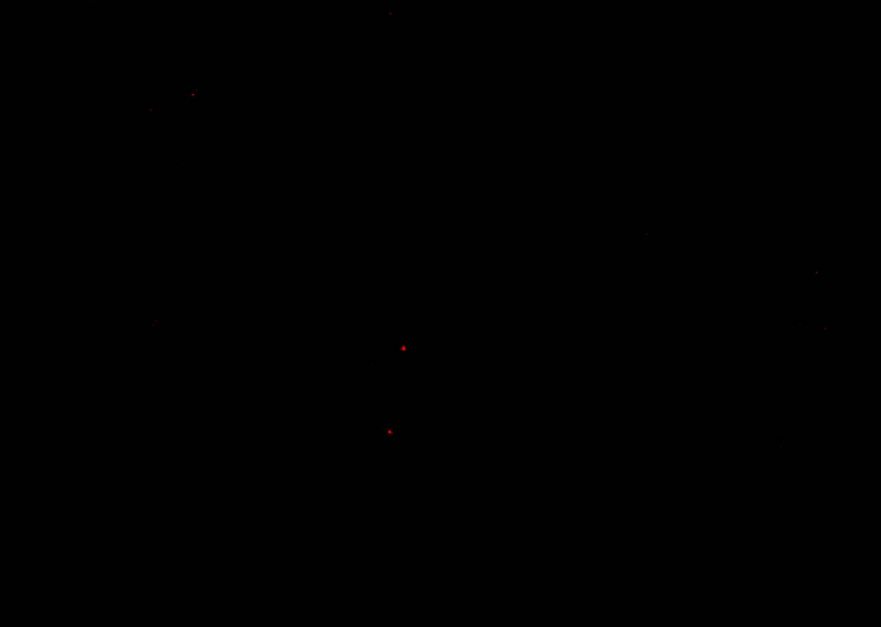

Figure 1(D4, G2) - Centrin

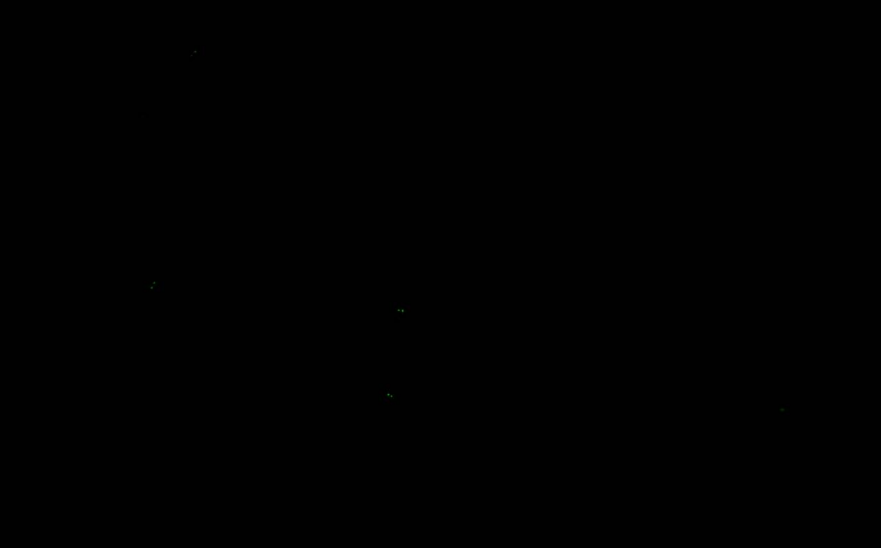

Figure 1(D4, G2) - DAPI

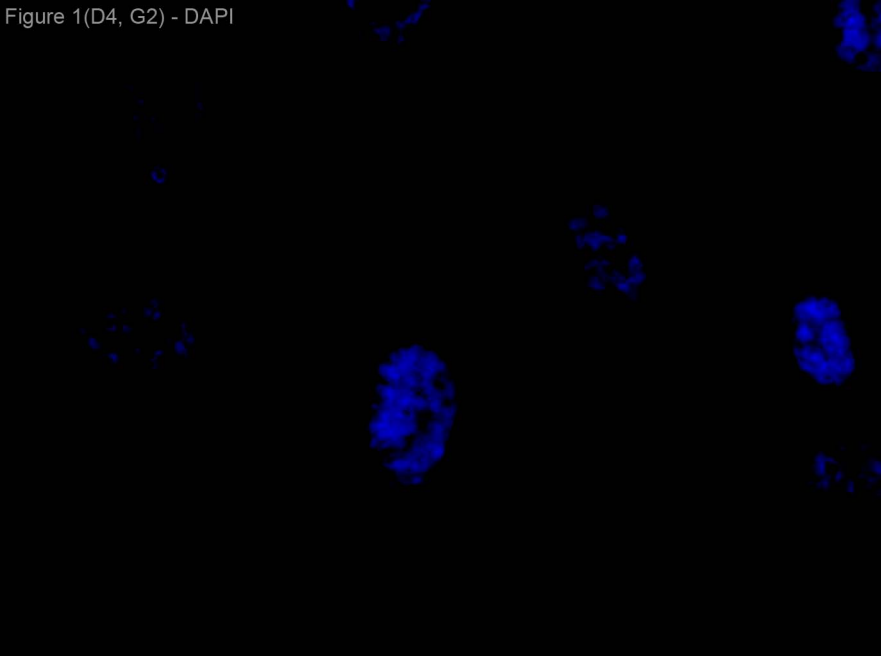



Figure 1(D4, G2) - Merge

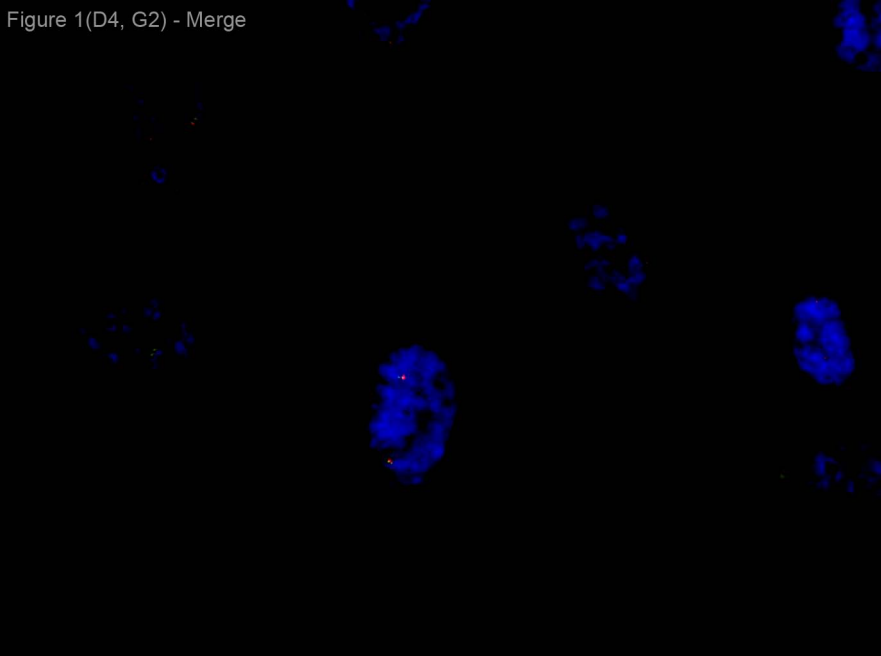

Figure 1(D5, Prophase) - Cep78

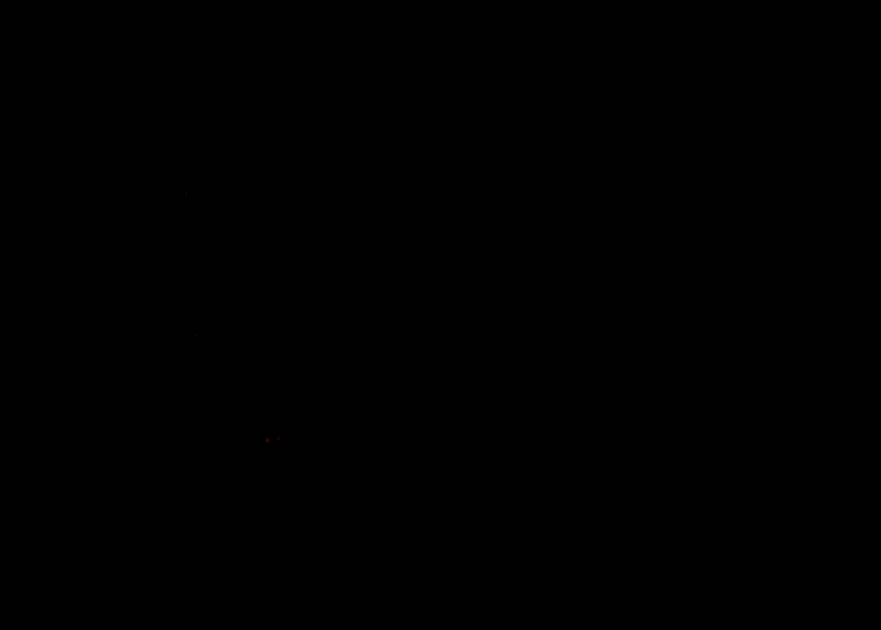

Figure 1(D5, Prophase) - Centrin



2 4

Figure 1(D5, Prophase) - DAPI

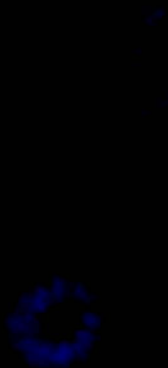

Figure 1(D5, Prophase) - Merge

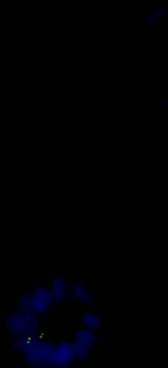

Figure 1(D6, Metaphase) - Cep78

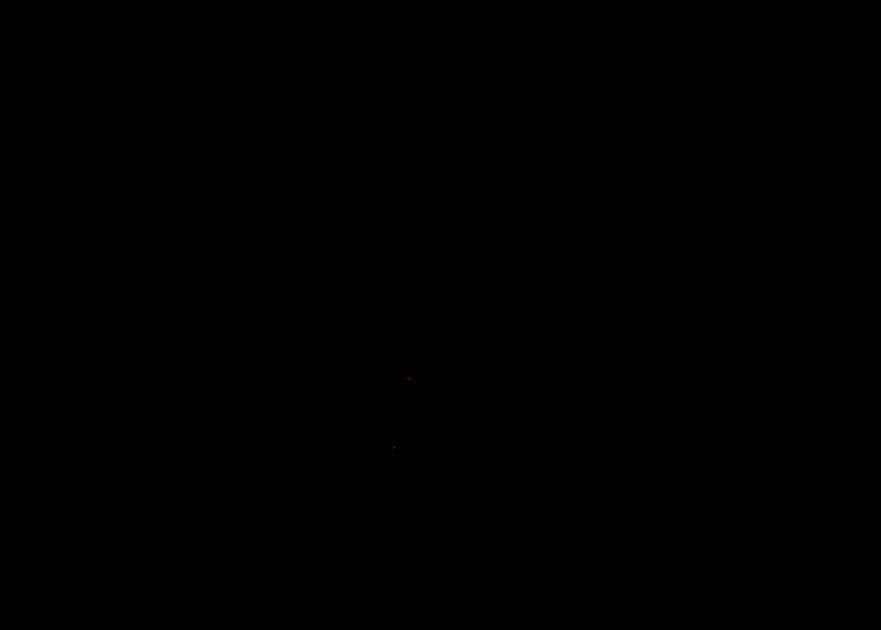

Figure 1(D6, Metaphase) - Centrin

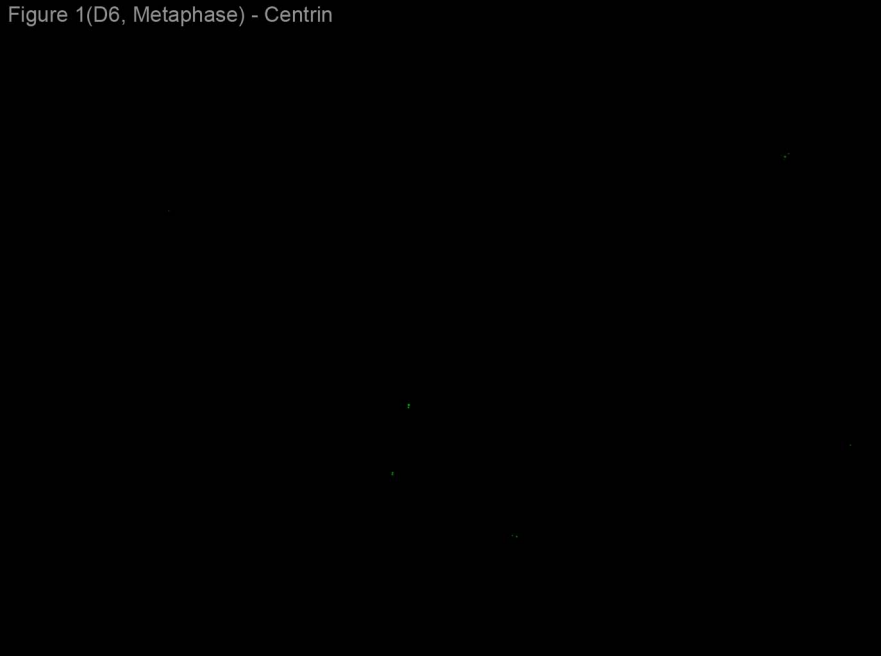

Figure 1(D6, Metaphase) - DAPI

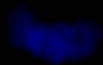



Figure 1(D6, Metaphase) - Merge

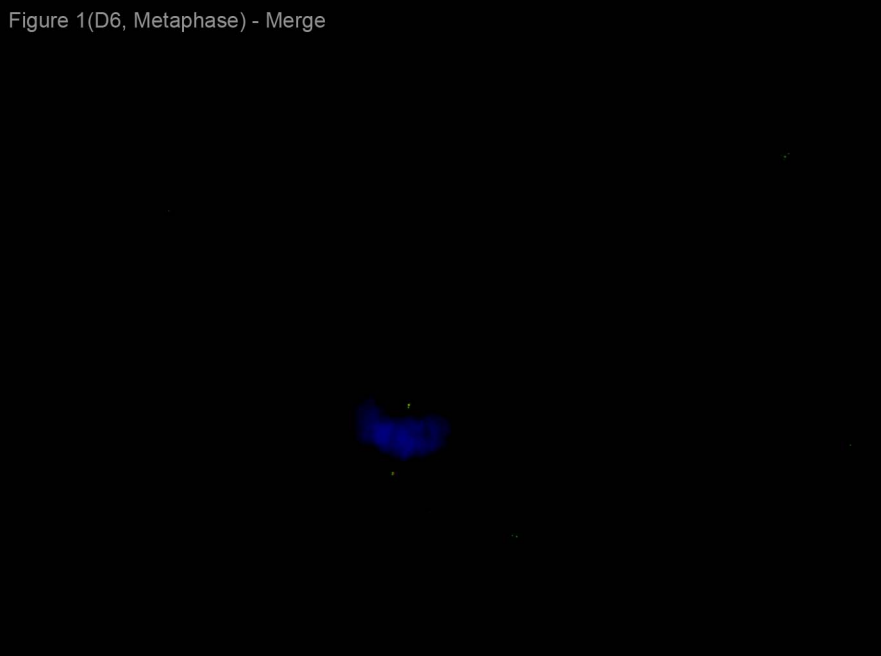

Figure 1(D7, Anaphase) - Cep78

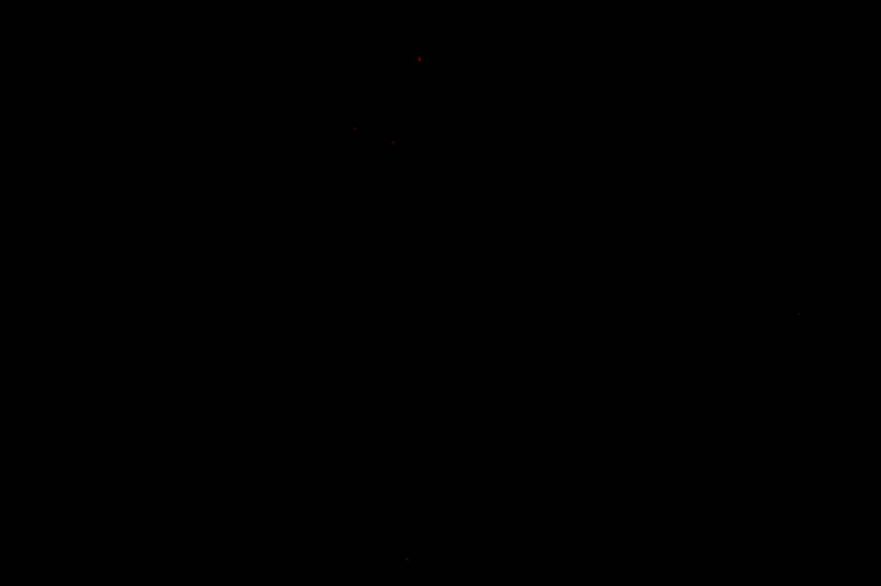

Figure 1(D7, Anaphase) - Centrin

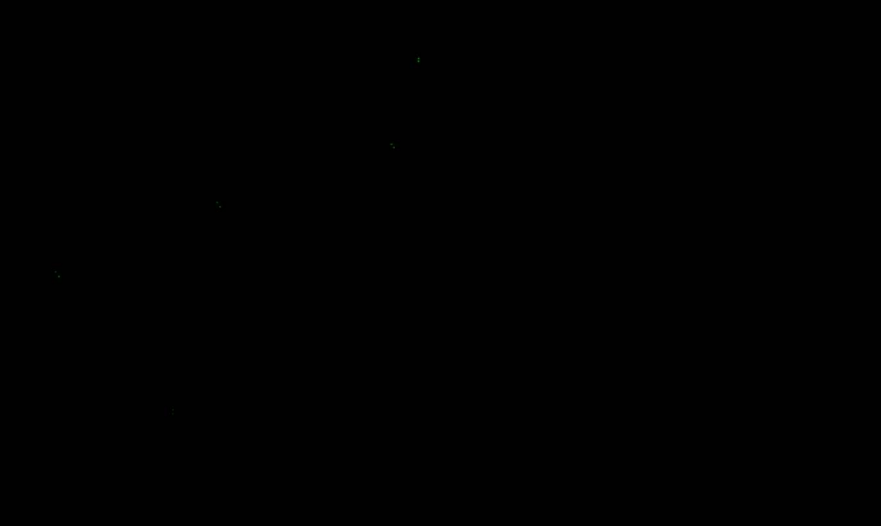

Figure 1(D7, Anaphase) - DAPI

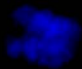

Figure 1(D7, Anaphase) - Merge

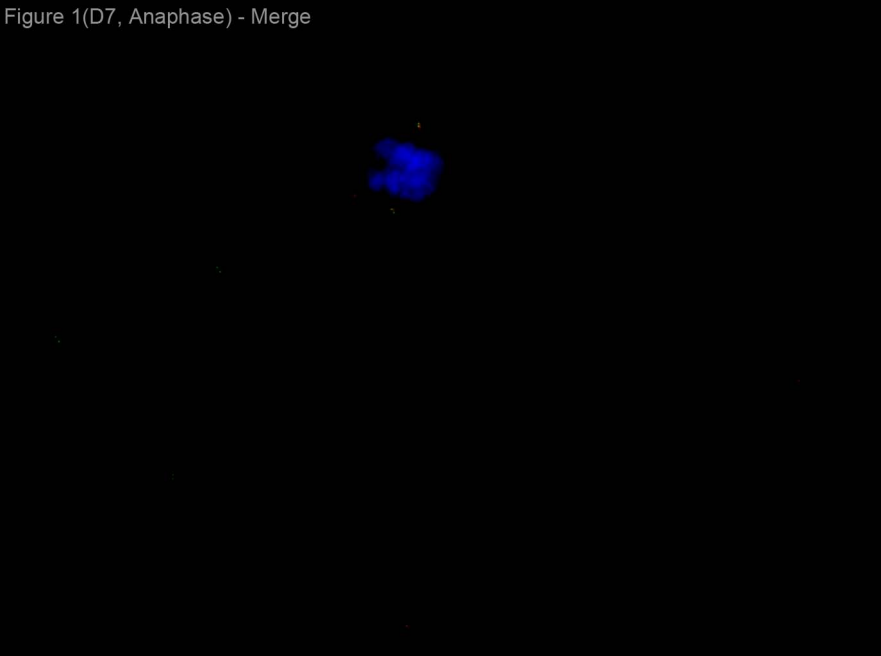

Figure 1(D8, Telophase) - Cep78

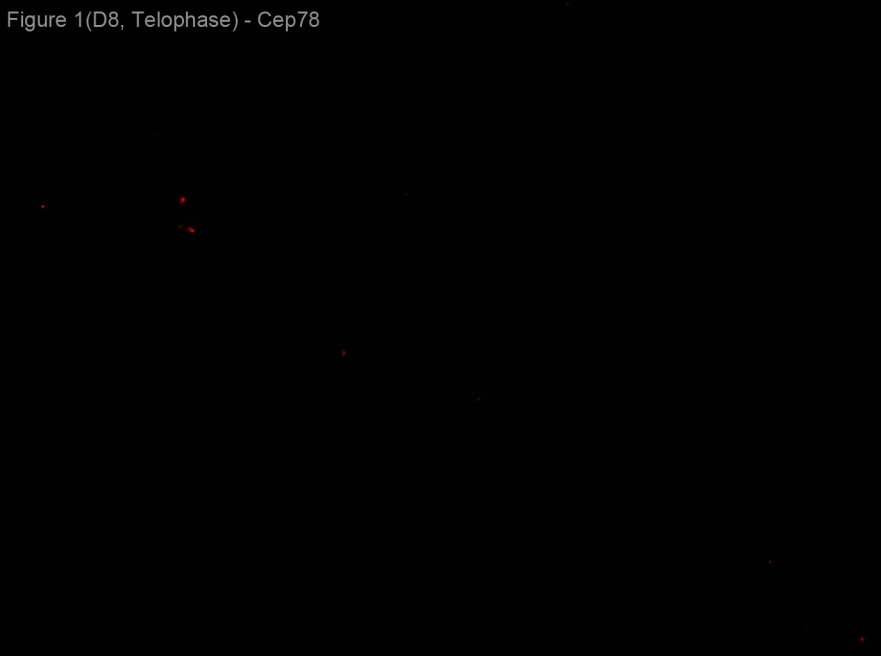

Figure 1(D8, Telophase) - Centrin

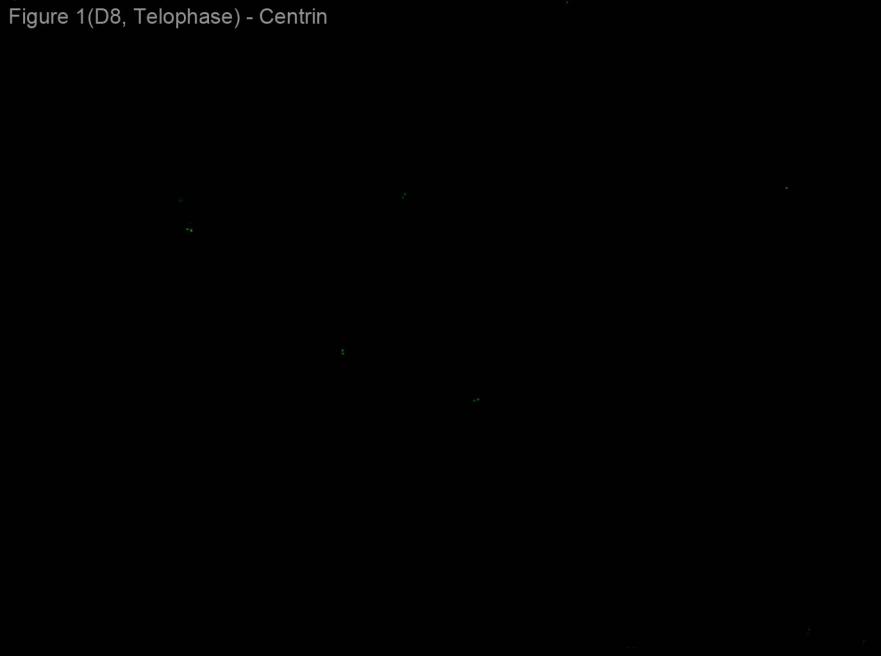

Figure 1(D8, Telophase) - DAPI

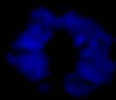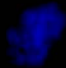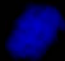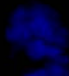



Figure 1(D8, Telophase) - Merge

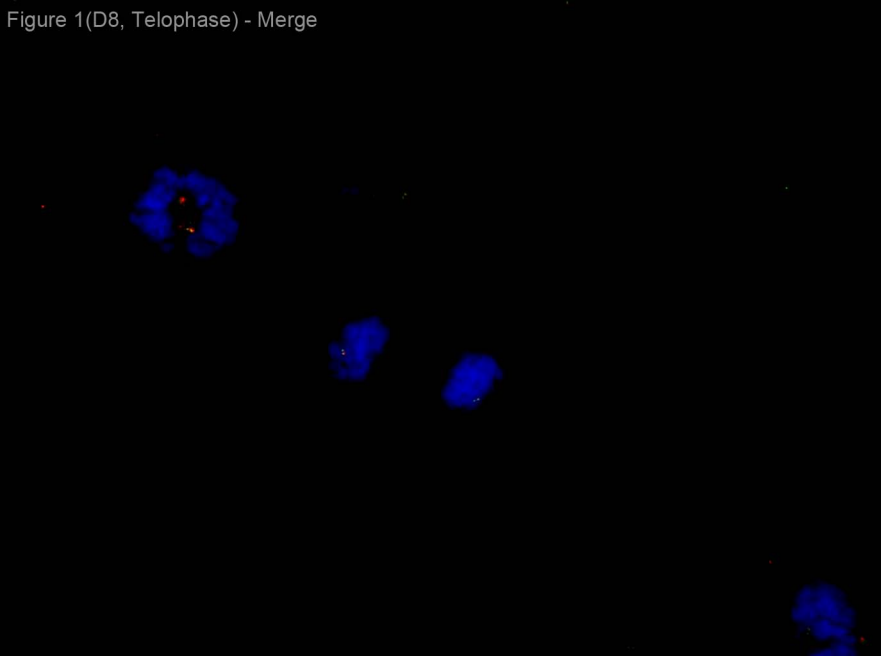

Figure 1 (F)

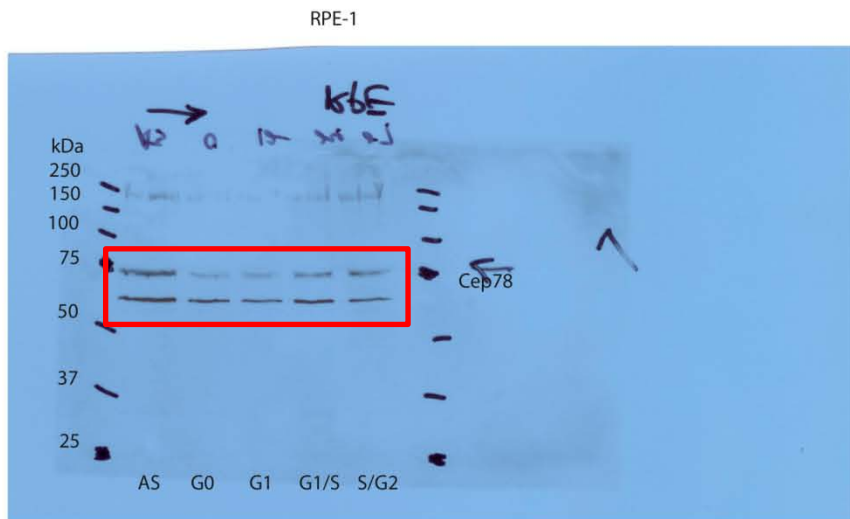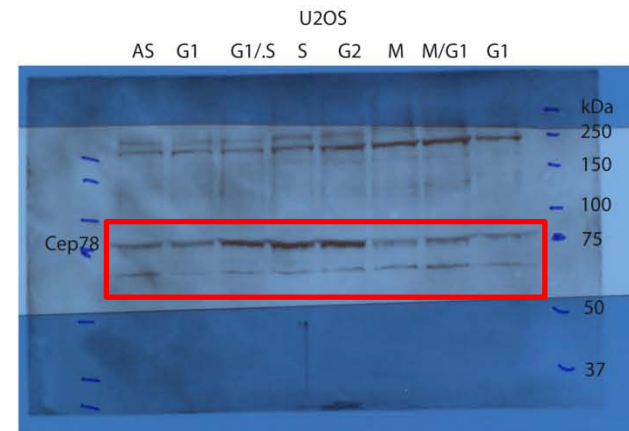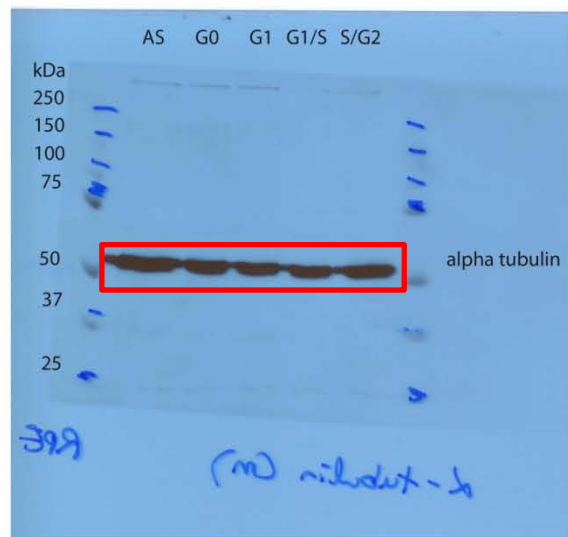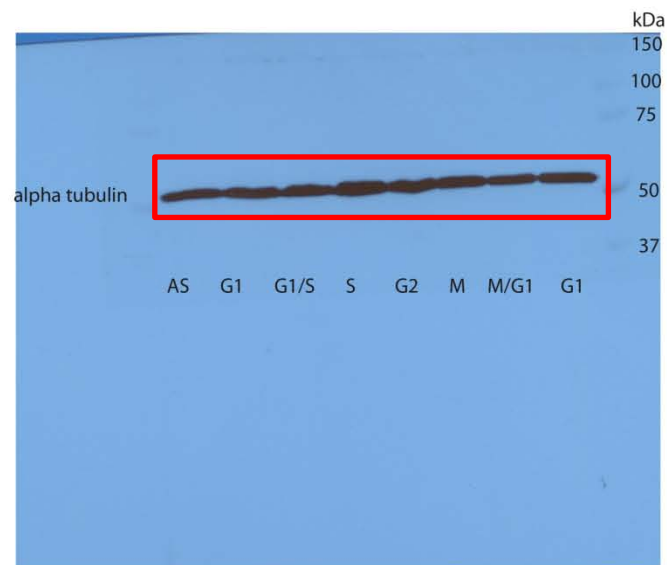

RPE-1

U2OS
