# Supplementary material
Source: PubMed Central journal article supplement (PMC5376967)

Figure 7 (B)

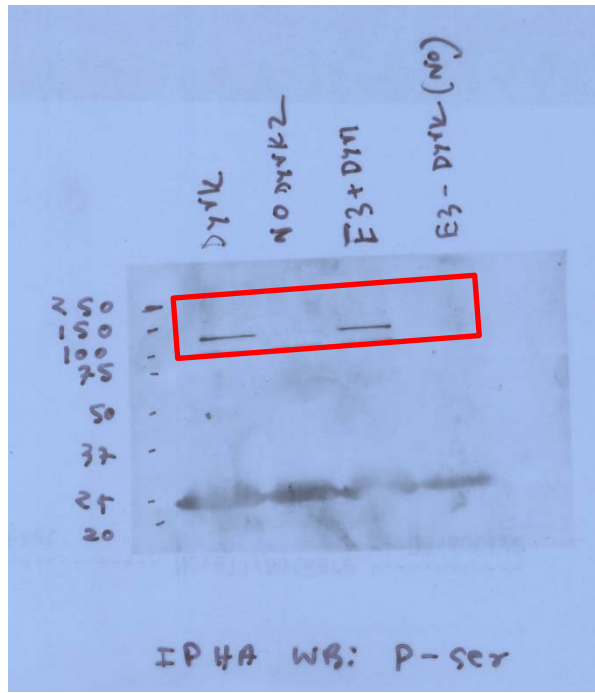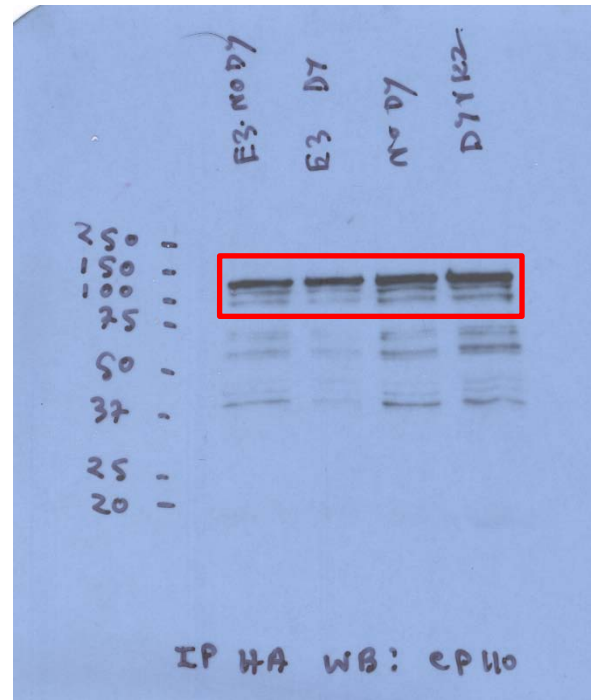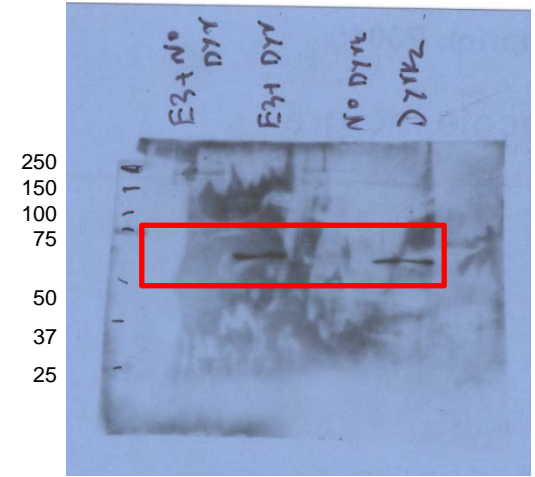

IN: DYRK2

Figure 7 (C and F)

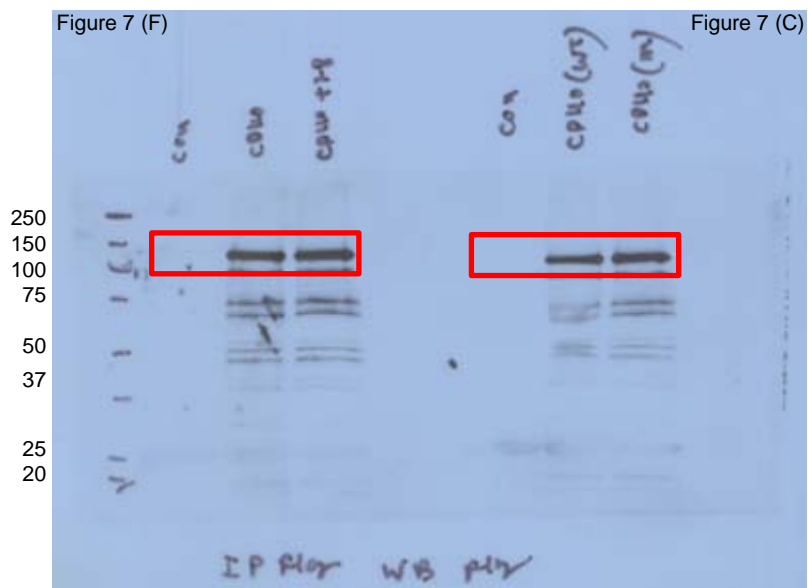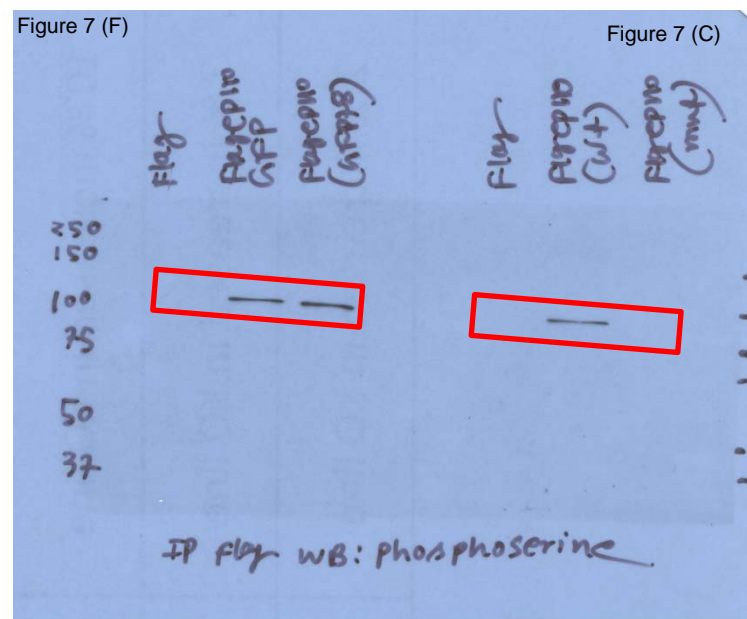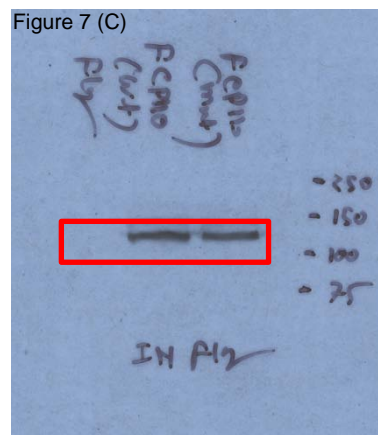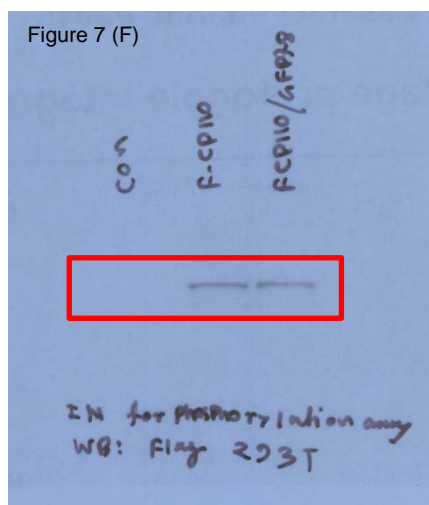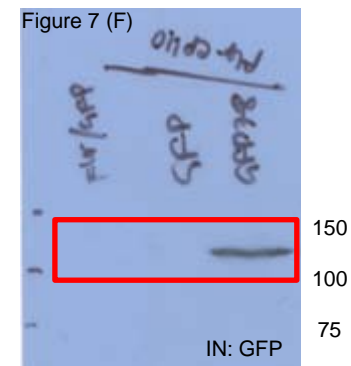

Figure 7 (D)

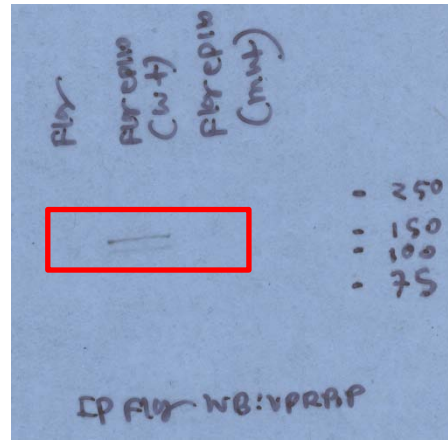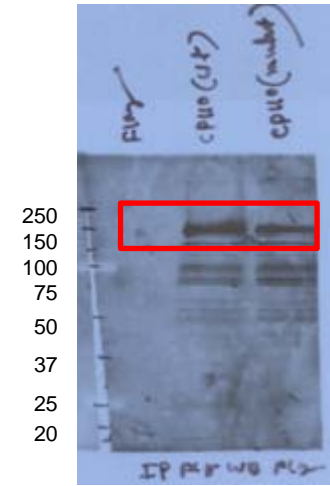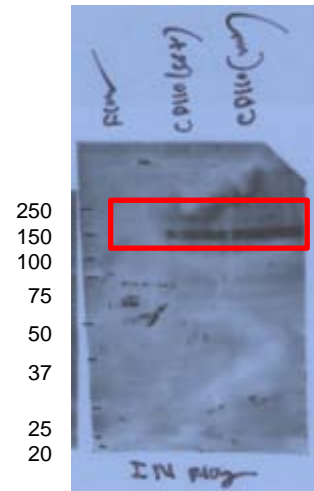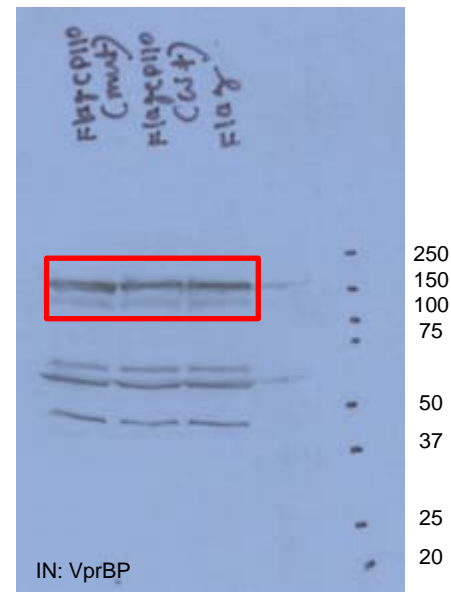

Figure 7 (E)

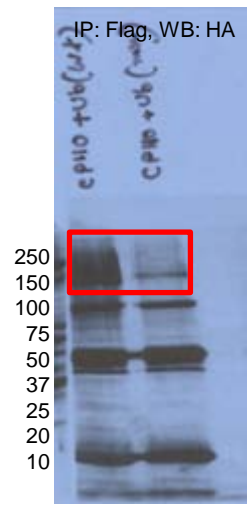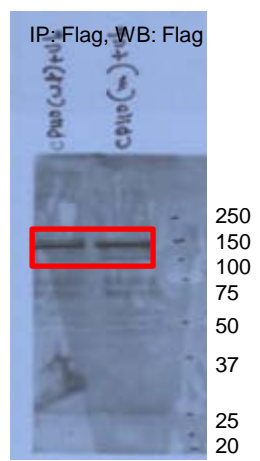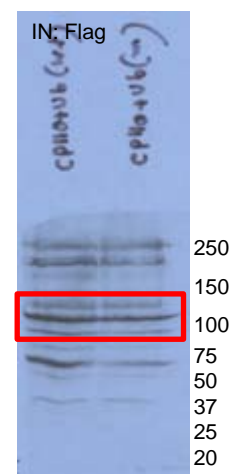

Figure 7 (G)

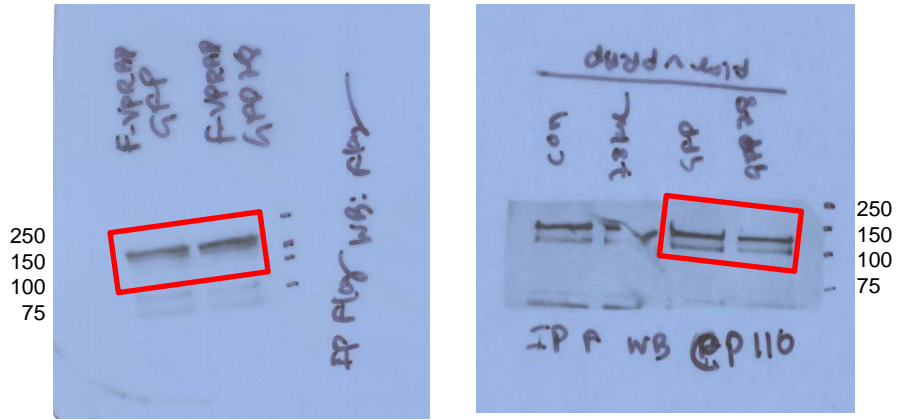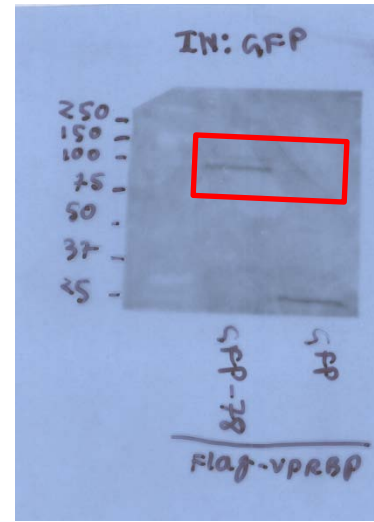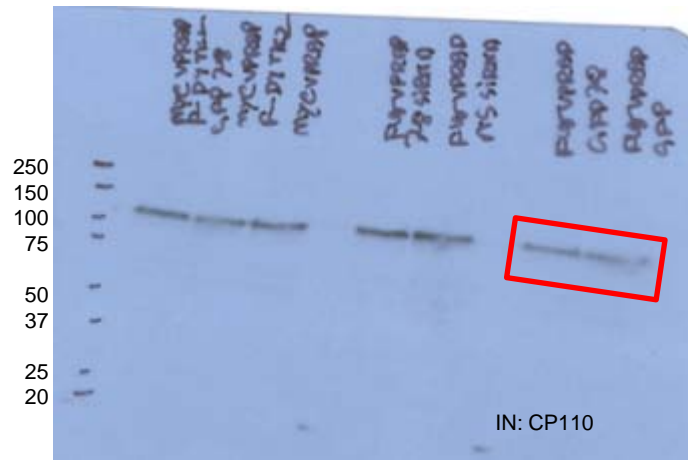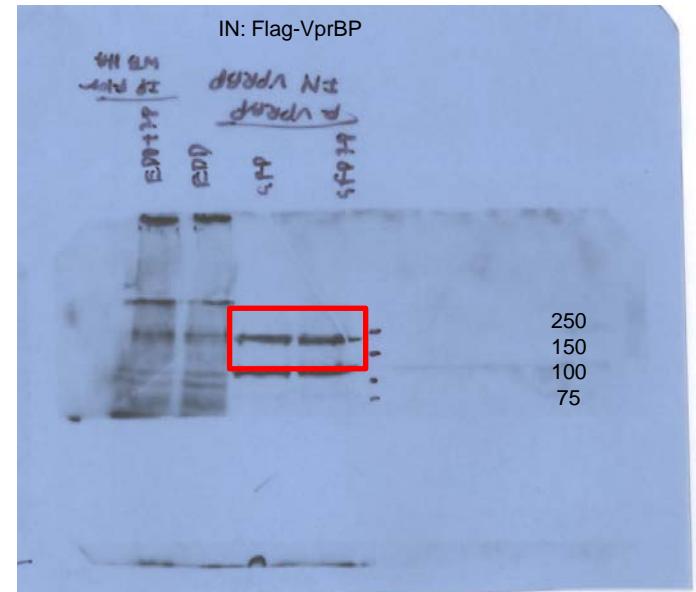

Supplement: EMBR-18-632-s010.pdf [file EMBR-18-632-s010.pdf]
